# Supplementary material for: Novel genetic loci affecting facial shape variation in humans
Source: eLife. 2019 Nov 26;8:e49898. doi: 10.7554/eLife.49898 (PMC6905649; doi:10.7554/eLife.49898)
Supplement: Supplementary file 1. — Includes: Supplementary Table 1. Characteristics of the all cohorts. Supplementary Table 2 Characteristics of 78 facial phenotypes in RS. Supplementary Table 3 Effects of 6 covariates to 78 facial phenotypes in RS. Supplementary Table 4. Phenotype correlations between all facial phenotypes in RS. Supplementary Table 5. Genetic correlation between all facial phenotypes in RS. Supplementary Table 6. Twins heritability and SNP-based heritability of all facial phenotypes in TwinsUK and QIMR. Supplementary Table7. 494 SNPs associated (p<5e-8) with facial shape phenotypes in meta-analysis of GWAS. Supplementary Table 8. Replication of reported variants of facial variation. Supplementary Table 9. GWAS Catalog entries (release on 2018-01-01), for polymorphisms that were significantly associated with facial traits in meta-analyses. Supplementary Table 10. Significant pleiotropic effect of study-wide suggestive SNPs on GeneATLAS traits. Supplementary Table 11. Frequency distribution of 24 top-associated SNPs. Supplementary Table 12. Population differentiation and positive selection at the suggestive significant GWAS SNPs. Supplementary Table 13. Replication of reported variants of NSCL/P trait. Supplementary Table 14. Multiple linear regression for 31 top-associated SNPs fitting with SEX and AGE in RS. Supplementary Table 15. Enrichment of the genes annotating the associated 24 regions. Supplementary Table 16. Significant expression quantitative trait loci effects for 494 SNPs significantly associated with facial traits and the target genes. Supplementary Table 17. Overviews of 5 selected candidate regulatory SNPs. Supplementary Table 18. Luciferase reporter assay results overview presented as relative luciferase activity fold change compared to construct containing less active allele ± standard deviation. Supplementary Table 19. Key Resource Table for functional experiments. [file elife-49898-supp1.xlsx]

## Sheet: TS1
	Table S1. Characteristics of the all cohorts
	Cohort	Country	Individual	For	Image	N	Male%	Average age	SD of age	Covariances
	RS	Netherlands	Unrelated	Discovery	3dMD image	3193	41.8	58.4	6.2	Sex, Age, 4PCs
	TwinsUK	UK	Twins	Discovery	3dMD image	1020	0	59.5	9.5	Age, 4PCs
	ALSPAC	UK	Unrelated	Discovery	3dMD image	3707	47.5	15.3	0.3	Sex, Age, 4PCs, Height
	Pittsburgh sample	US	Unrelated	Discovery	3dMD image	2195	38.1	22.5	9.4	Sex, Age, Age2, 4PCs, Height, Weight
	QIMR	Australia	Twins	Replication	2D photos	1101	34.8	36.7	17.2	Sex, Age, 5PCs, BMI
	CANDELA	Latin America	Unrelated	Replication	2D photos	5958	45.9	24.5	5.7	Sex, Age, 5PCs, BMI
	UYG	China	Unrelated	Replication	3dMD image	858	38.5	20.2	1.3	Sex, 4PCs
	"PCs" in Covariances column: The first few genetic PCs derived from SNP data using GCTA software package

## Sheet: TS2
	Table S2. Characteristics of 78 facial phenotypes in RS
	P column : Shapiro-Wilk test P, Bonferroni corrected significant threshold is set on p<0.00064
			L1	L2	_	Min	L95	Mean	U95	Max	SD	Prop>3sd	P
	Intra-organs landmark pairs Euclidean distances (22 pairs)	Eyes (4 landmarks, 6 pairs)	ExR	EnR		18.87	23.47	26.71	30.11	36.57	2.07	0.0103	0.0261699
			ExR	EnL		48.61	55.83	61.28	66.73	76.69	3.36	0.0063	0.107527
			ExR	ExL		68.72	80.9	87.16	93.21	99.86	3.75	0.005	0.152272
			EnR	EnL		27.39	31	34.85	38.69	44.38	2.37	0.005	0.0648421
			EnR	ExL		49.3	56.09	61.02	65.96	75.24	3.04	0.0056	0.0370347
			EnL	ExL		16.48	22.13	26.48	30.79	44.01	2.7	0.0094	0.15542
		Nose (5 landmarks, 10 pairs)	N	Prn		33.43	40.18	45.61	50.82	55.49	3.27	0.0038	0.0390885
			N	AlL		38.63	44.49	47.94	51.57	57.88	2.16	0.005	0.0139425
			N	Sn		40.63	46.7	51.33	56.22	65.68	2.92	0.0047	0.105593
			N	AlR		40.56	43.98	47.64	51.46	58.24	2.28	0.0053	0.0845572
			Prn	AlL		16.91	29.44	35.25	39.76	44.68	3.57	0.0319	9.46262e-05
			Prn	Sn		4.88	13.87	20.85	24.65	36.68	2.95	0.0225	0.0654211
			Prn	AlR		17.05	27.8	34.46	39.11	44.81	3.63	0.0294	0.000546595
			AlL	Sn		14.33	20.62	23.7	27.26	37.93	2.32	0.0175	0.00261675
			AlL	AlR		27.73	32.73	37.26	42.18	47.9	2.88	0.0031	0.0148763
			Sn	AlR		14.84	20.47	23.6	27.01	37.87	2.32	0.02	0.00161667
		Mouth (4 landmarks, 6 pairs)	Ls	ChR		22.49	27.46	32.3	36.66	46.06	2.83	0.0063	0.00983834
			Ls	Li		0.62	8.16	11.69	17.36	35.54	3.09	0.0191	0.00277575
			Ls	ChL		19.06	25.69	30.95	35.84	51.2	3.08	0.0063	0.000214084
			ChR	Li		18.03	25.57	30.78	35.8	51.28	3.17	0.005	0.273284
			ChR	ChL		34.1	45.1	50.95	56.93	67.42	3.64	0.0072	0.370493
			Li	ChL		17.89	24.24	29.43	34.65	42.74	3.19	0.0034	0.118727
	Inter-organs landmark pairs Euclidean distances (56 pairs)	Eyes-Nose (9 landmarks, 20 pairs)	ExR	N		33.71	43.63	47.91	52	62.8	2.64	0.0081	0.131317
			ExR	Prn		47.45	62.78	68.57	73.24	77.23	3.34	0.015	0.00195929
			ExR	AlL		62.8	68.87	73.02	77.18	81.87	2.52	0.0041	0.170533
			ExR	Sn		53.49	62.47	66.85	71.23	77.65	2.66	0.006	0.00814351
			ExR	AlR		33.9	41.99	46.23	50.31	55.67	2.55	0.0038	0.0719708
			EnR	N		15.38	20.91	23.95	27.17	39.2	2.05	0.0097	3.60584e-05
			EnR	Prn		35.76	46.29	52.92	58.03	63.78	3.68	0.021	0.0461665
			EnR	AlL		43.62	49.21	51.88	54.69	59.44	1.74	0.0075	0.0463856
			EnR	Sn		39.76	47.91	51.89	55.88	64.43	2.51	0.0103	0.17903
			EnR	AlR		27.73	34.36	37.95	41.27	47.38	2.15	0.0075	0.0301663
			N	EnL		15.73	21.23	24.67	28.43	36.16	2.26	0.0075	0.0047711
			Prn	EnL		36.79	46.4	52.78	57.81	62.52	3.65	0.0207	0.176766
			EnL	AlL		27.85	34.19	37.37	40.43	45.77	1.97	0.0106	0.301919
			EnL	Sn		41.26	47.7	51.64	55.74	65.02	2.53	0.0113	0.278042
			EnL	AlR		44.94	49.09	52.3	55.51	61.3	1.98	0.0053	0.0509601
			N	ExL		33.58	44.13	48.52	53.12	62.38	2.77	0.0056	0.0260134
			Prn	ExL		51.97	62.4	68.57	73.72	78.95	3.41	0.0119	0.167894
			ExL	AlL		37.24	41.91	46.16	50.3	60.07	2.6	0.0056	0.0815053
			ExL	Sn		53.37	62.37	66.75	71.56	82.57	2.8	0.0078	0.0108517
			ExL	AlR		64.15	69.31	73.57	77.84	86.93	2.65	0.0072	0.111688
		Eyes-Mouth (8 landmarks, 16 pairs)	ExR	Ls		68.4	76.15	80.24	84.47	90.03	2.55	0.0081	0.0312833
			ExR	ChR		43.89	66.69	71.92	77.18	83.01	3.28	0.006	0.0380542
			ExR	Li		76.53	84.22	88.59	93.18	103.46	2.78	0.0085	0.0976332
			ExR	ChL		86.31	93.83	97.81	101.81	108.25	2.45	0.0085	0.0111624
			EnR	Ls		54.65	64.14	68.44	72.88	79.94	2.7	0.005	0.0431703
			EnR	ChR		48.22	65.47	70.29	75.02	81.77	2.96	0.0047	0.0838277
			EnR	Li		66.88	73.81	78.25	82.95	92.14	2.83	0.0097	0.0342332
			EnR	ChL		70.25	77.92	81.65	85.18	94.28	2.28	0.0094	0.0322676
			EnL	Ls		58.36	64.03	68.21	72.64	79.2	2.65	0.0056	0.0399604
			EnL	ChR		64.91	78.29	82.17	86.3	93.48	2.46	0.0085	0.152293
			EnL	Li		65.64	73.75	78.08	82.88	92.86	2.83	0.0078	0.185502
			EnL	ChL		58.31	65.72	70.23	74.86	87.7	2.86	0.0097	0.0305984
			ExL	Ls		66.93	76.32	80.27	84.4	91.41	2.53	0.0063	0.0113052
			ExL	ChR		82.37	94.81	98.91	103.26	110.7	2.65	0.0094	0.0250173
			ExL	Li		73.26	84.4	88.78	93.5	101.96	2.78	0.0075	0.014657
			ExL	ChL		60.76	68.09	72.9	78.25	92.32	3.12	0.0072	0.254347
		Nose-Mouth (9 landmarks, 20 pairs)	N	Ls		58.32	65.02	70.32	75.77	83.44	3.27	0.0053	0.018682
			N	ChR		61.93	76.98	81.86	86.7	96.51	2.98	0.0053	0.213488
			N	Li		70.05	75.9	81.3	87.14	97.23	3.46	0.0078	0.0451024
			N	ChL		70.43	77.31	81.99	86.52	96.65	2.89	0.0066	0.347242
			Prn	Ls		15.99	31.32	36.3	41.32	51.6	3.16	0.0072	0.0157721
			Prn	ChR		38.2	51.63	58.1	63.41	68.91	3.65	0.0106	0.00829029
			Prn	Li		29.96	41.06	47.1	53.58	66.34	3.85	0.0106	0.0670341
			Prn	ChL		42.38	51.48	57.79	63.14	67.87	3.54	0.0091	0.349125
			AlL	Ls		25.42	30.84	34.35	38.18	47.94	2.3	0.006	0.0349522
			AlL	ChR		44.3	51.78	56.12	60.44	67.84	2.65	0.0053	0.114913
			AlL	Li		31.95	39.21	43.14	47.75	58.87	2.72	0.0119	0.000317064
			AlL	ChL		22.08	31	34.82	38.69	52.79	2.41	0.0063	0.140337
			Sn	Ls		2.63	15.34	19.72	24.67	35.78	2.99	0.0097	0.00272585
			Sn	ChR		29.26	36.9	41.62	46.61	55.83	3.01	0.0088	0.0763284
			Sn	Li		8.62	25.76	30.95	37.11	51.4	3.6	0.0163	0.0150797
			Sn	ChL		28.23	35.99	40.76	45.69	59.57	3.03	0.0069	0.00408086
			AlR	Ls		25.76	30.69	34.27	38.38	52.08	2.42	0.0063	0.00122218
			AlR	ChR		16.43	30.65	34.92	39.49	49.33	2.82	0.01	0.0122644
			AlR	Li		31.73	38.97	43.01	47.75	59.9	2.85	0.0141	0.000262364
			AlR	ChL		44.92	51.21	55.39	59.85	67.04	2.68	0.0075	0.00262451

## Sheet: TS3
	Table S3. Effects of 6 covariates to 78 facial phenotypes in RS
						SEX				AGE						PC1				PC2				PC3				PC4
			L1	L2	_	Estimate	Std. Error	Pr(>|t|)	_	Estimate	Std. Error	Pr(>|t|)	_	Sex+Age R2	_	Estimate	Std. Error	Pr(>|t|)	_	Estimate	Std. Error	Pr(>|t|)	_	Estimate	Std. Error	Pr(>|t|)	_	Estimate	Std. Error	Pr(>|t|)
	Intra-organs landmark pairs Euclidean distances (22 pairs)	Eyes (4 landmarks, 6 pairs)	ExR	EnR		0.171677	0.0350782	1.03657e-06		-0.033242	0.00277973	2.83864e-32		0.0515905		1.91601	1.87146	0.306006		-1.89734	1.91352	0.321494		4.44787	1.8691	0.0173862		0.194597	2.12941	0.927192
			ExR	EnL		0.517689	0.0345996	5.74187e-49		-0.0152418	0.00274181	2.93646e-08		0.0740625		4.20816	1.84593	0.0226915		-1.08597	1.88741	0.565077		4.18533	1.8436	0.0232627		-2.35053	2.10036	0.263178
			ExR	ExL		0.427119	0.0341788	5.09063e-35		-0.0381821	0.00270845	7.96604e-44		0.0954859		2.47039	1.82348	0.175587		-2.28909	1.86445	0.21963		3.02546	1.82118	0.0967585		-1.22244	2.07481	0.555781
			EnR	EnL		0.596425	0.0342594	6.49048e-65		0.00765887	0.00271485	0.00481545		0.094672		4.70777	1.82778	0.0100491		0.052333	1.86886	0.977662		2.15896	1.82548	0.237023		-3.29297	2.07971	0.113434
			EnR	ExL		0.440853	0.0347168	4.44487e-36		-0.0250358	0.00275109	1.54798e-19		0.0740836		2.15442	1.85218	0.244844		-1.36811	1.8938	0.470092		0.877482	1.84985	0.63528		-1.54946	2.10747	0.462257
			EnL	ExL		-0.0203941	0.0351178	0.56146		-0.0349506	0.00278286	2.39928e-35		0.0556476		-1.75837	1.87357	0.348053		-1.53376	1.91568	0.423401		-0.499641	1.87121	0.789475		0.654643	2.13181	0.758801
		Nose (5 landmarks, 10 pairs)	N	Prn		-0.387946	0.0351404	7.79082e-28		0.0124986	0.00278466	7.43108e-06		0.0435088		-6.42178	1.87478	0.000621769		1.68935	1.91691	0.378227		-3.51432	1.87242	0.0606245		0.933869	2.13319	0.661575
			N	AlL		-0.250641	0.0355715	2.24485e-12		0.0114848	0.00281882	4.72717e-05		0.0213123		-4.85771	1.89778	0.0105226		2.27861	1.94043	0.24037		2.3809	1.89539	0.209152		0.267065	2.15936	0.901578
			N	Sn		-0.250924	0.0355037	1.92885e-12		0.0151654	0.00281345	7.54463e-08		0.0257216		-6.09351	1.89416	0.0013084		1.07891	1.93673	0.577513		-1.17809	1.89178	0.533497		-0.431975	2.15524	0.841157
			N	AlR		-0.195903	0.035699	4.39213e-08		0.010704	0.00282892	0.000157306		0.0138369		-3.8115	1.90458	0.0454525		2.74456	1.94738	0.158827		1.68965	1.90218	0.374463		2.74448	2.1671	0.205452
			Prn	AlL		-0.505723	0.0348193	2.49279e-46		-0.00381592	0.00275921	0.16677		0.131015		-2.33402	1.85765	0.20905		0.179667	1.8994	0.924645		-1.17703	1.85531	0.525857		-0.379024	2.1137	0.857699
			Prn	Sn		0.0860094	0.0359344	0.0167455		0.00524697	0.00284758	0.0654791		0.00448527		-1.59195	1.91714	0.406389		0.330915	1.96023	0.865953		0.108423	1.91473	0.954847		-1.78333	2.18139	0.413692
			Prn	AlR		-0.492181	0.0348762	6.53407e-44		-0.00418643	0.00276372	0.129927		0.113712		-2.40621	1.86069	0.19604		-0.885882	1.9025	0.641504		-1.56506	1.85834	0.399751		0.406953	2.11715	0.847584
			AlL	Sn		-0.699086	0.0337548	1.69347e-89		0.0083407	0.00267485	0.0018359		0.140601		-1.61105	1.80086	0.371068		-0.758351	1.84133	0.680477		-0.804231	1.79859	0.6548		0.754128	2.04907	0.712873
			AlL	AlR		-0.281929	0.0354304	2.42268e-15		0.0169573	0.00280764	1.72239e-09		0.0291472		0.461494	1.89025	0.807135		-0.508252	1.93273	0.79259		4.17012	1.88787	0.0272525		-1.27226	2.15079	0.554207
			Sn	AlR		-0.697548	0.0337886	5.68162e-89		0.0045781	0.00267753	0.0873965		0.145564		0.12139	1.80266	0.946316		-2.88506	1.84317	0.117618		1.15431	1.80039	0.521473		-1.47456	2.05113	0.472254
		Mouth (4 landmarks, 6 pairs)	Ls	ChR		0.209224	0.0355411	4.34634e-09		-0.0175281	0.00281641	5.49447e-10		0.0227976		-0.984811	1.89616	0.603538		2.08898	1.93877	0.281348		1.10973	1.89377	0.557925		-7.08527	2.15751	0.00103452
			Ls	Li		0.469543	0.0349657	4.93782e-40		-0.00953294	0.00277081	0.000588137		0.0782644		0.285761	1.86546	0.878262		0.955495	1.90738	0.616444		-1.44136	1.86311	0.439205		-1.18311	2.12258	0.577299
			Ls	ChL		0.350869	0.0352591	5.3785e-23		-0.0175876	0.00279406	3.50306e-10		0.0390175		-2.01038	1.88111	0.285277		-1.04936	1.92339	0.585394		0.148876	1.87874	0.936845		0.076809	2.14039	0.971376
			ChR	Li		0.0531579	0.0358748	0.138502		-0.00730562	0.00284285	0.0102201		0.00254379		-3.78306	1.91396	0.0481772		1.95413	1.95697	0.318088		2.17131	1.91155	0.256088		-5.84772	2.17777	0.00728641
			ChR	ChL		0.0664809	0.0358942	0.0640992		-0.00796228	0.00284439	0.00515235		0.00348863		-1.08678	1.915	0.570407		1.29053	1.95803	0.509884		2.57364	1.91259	0.178516		-4.77465	2.17895	0.0285052
			Li	ChL		0.147566	0.0358869	4.02223e-05		-0.00421835	0.00284381	0.138082		0.00577535		-1.87773	1.91461	0.326798		0.348409	1.95764	0.858754		0.230018	1.9122	0.904261		-0.502651	2.17851	0.817538
	Inter-organs landmark pairs Euclidean distances (56 pairs)	Eyes-Nose (9 landmarks, 20 pairs)	ExR	N		0.182044	0.0353997	2.87424e-07		-0.0251216	0.0028052	5.63129e-19		0.0352952		2.7843	1.88861	0.140511		0.409411	1.93105	0.832109		3.63948	1.88623	0.0537577		-0.438041	2.14893	0.83849
			ExR	Prn		-0.21471	0.0354362	1.52933e-09		-0.021145	0.00280809	6.56705e-14		0.0315176		-2.73615	1.89056	0.14792		-0.181257	1.93305	0.9253		-1.52885	1.88818	0.418174		0.302025	2.15114	0.888351
			ExR	AlL		0.248953	0.0354742	2.74096e-12		-0.0178755	0.00281111	2.32233e-10		0.0256121		0.770449	1.89259	0.683972		-0.94541	1.93512	0.625192		5.76873	1.89021	0.0022927		0.306732	2.15345	0.886744
			ExR	Sn		-0.0850261	0.0355478	0.0168198		-0.0236491	0.00281694	6.89624e-17		0.0264537		-1.70852	1.89651	0.367724		-1.94545	1.93913	0.315814		1.82655	1.89412	0.334956		-0.146201	2.15792	0.945988
			ExR	AlR		0.367891	0.0349713	1.82182e-25		-0.0254908	0.00277125	6.39981e-20		0.0588346		-1.1125	1.86576	0.551035		0.561627	1.90769	0.76847		1.59346	1.86341	0.392542		3.38683	2.12292	0.11073
			EnR	N		-0.209843	0.035755	4.83682e-09		-0.0064108	0.00283336	0.0237265		0.0156704		1.0691	1.90757	0.575213		2.21455	1.95044	0.256288		1.02842	1.90517	0.589368		0.34642	2.1705	0.873203
			EnR	Prn		-0.524788	0.0346903	5.5568e-50		-0.00161548	0.00274899	0.556799		0.0956006		-3.73581	1.85077	0.0436211		1.12213	1.89236	0.553237		-4.72194	1.84844	0.0106783		1.32361	2.10587	0.529698
			EnR	AlL		0.029497	0.0357882	0.409882		0.0163198	0.00283599	9.51233e-09		0.0123571		0.332676	1.90934	0.861691		2.00875	1.95225	0.303586		1.92638	1.90694	0.312479		0.992027	2.17252	0.647971
			EnR	Sn		-0.481373	0.0349285	5.14976e-42		0.00424646	0.00276786	0.125079		0.0652945		-3.08289	1.86348	0.0981493		0.160493	1.90535	0.932877		-2.76343	1.86113	0.137692		0.917369	2.12033	0.665295
			EnR	AlR		-0.104064	0.0358966	0.00376928		0.00393313	0.00284458	0.166862		0.00577866		-1.53606	1.91512	0.422573		2.49206	1.95816	0.203234		-1.18898	1.91271	0.534235		4.53237	2.17909	0.0376111
			N	EnL		-0.0950045	0.0359103	0.00819453		-0.00673662	0.00284567	0.0179766		0.00521239		1.73186	1.91586	0.366084		0.697629	1.95891	0.721766		2.04009	1.91344	0.286419		-0.381622	2.17993	0.861042
			Prn	EnL		-0.501723	0.0347679	8.94221e-46		-0.00179766	0.00275514	0.514143		0.0854316		-4.42385	1.85491	0.01714		0.431038	1.89659	0.820229		-6.05965	1.85257	0.00108333		1.41395	2.11058	0.502949
			EnL	AlL		-0.167779	0.0357815	2.86111e-06		0.00479945	0.00283546	0.0906192		0.00939462		-4.46788	1.90898	0.0193219		-0.159534	1.95188	0.934864		-4.68882	1.90658	0.0139741		2.9941	2.17211	0.168166
			EnL	Sn		-0.477405	0.0348625	1.61641e-41		0.00625684	0.00276264	0.0235913		0.0590506		-5.06818	1.85996	0.00646742		-1.0951	1.90175	0.564768		-6.02608	1.85761	0.00119084		1.56682	2.11632	0.459141
			EnL	AlR		0.0289933	0.0358426	0.41863		0.0144898	0.0028403	3.56682e-07		0.00822142		-0.0828976	1.91225	0.965425		-0.402112	1.95522	0.837069		0.000536171	1.90984	0.999776		0.644731	2.17582	0.767008
			N	ExL		0.107431	0.0349967	0.00216038		-0.0368769	0.00277327	2.62847e-39		0.0560429		0.257796	1.86712	0.890192		-1.59205	1.90908	0.404378		0.109399	1.86476	0.953221		-0.871369	2.12447	0.681717
			Prn	ExL		-0.203912	0.0352518	7.97879e-09		-0.0244925	0.00279348	2.91123e-18		0.0381216		-4.65967	1.88072	0.0132786		1.26467	1.92299	0.510805		-6.4121	1.87835	0.000648902		1.2738	2.13995	0.55172
			ExL	AlL		0.274388	0.0352409	9.27633e-15		-0.0237037	0.00279262	3.17604e-17		0.039646		-3.62207	1.88014	0.0541325		1.48394	1.92239	0.440218		-4.23737	1.87777	0.0241009		2.49551	2.13929	0.243495
			ExL	Sn		-0.131421	0.0355114	0.000218537		-0.02039	0.00281405	5.36796e-13		0.0252815		-5.1783	1.89457	0.00630627		0.565857	1.93715	0.770223		-5.60562	1.89218	0.00307397		1.88425	2.15571	0.382144
			ExL	AlR		0.12971	0.0356383	0.000277376		-0.0205006	0.00282411	4.87226e-13		0.0192746		-1.27583	1.90134	0.502261		-0.461801	1.94407	0.81225		0.247852	1.89895	0.896163		0.698159	2.16341	0.746934
		Eyes-Mouth (8 landmarks, 16 pairs)	ExR	Ls		-0.438643	0.0350384	3.89521e-35		-0.00899621	0.00277657	0.00120739		0.0491061		0.556276	1.86934	0.766044		0.579452	1.91135	0.761784		3.72442	1.86698	0.04614		1.05073	2.12699	0.621343
			ExR	ChR		-0.240178	0.0357023	2.04185e-11		-0.00108667	0.00282918	0.700936		0.0173171		3.28406	1.90476	0.0847811		0.624069	1.94756	0.748659		3.43603	1.90236	0.0709819		2.13231	2.1673	0.325262
			ExR	Li		-0.0595703	0.0358894	0.0970474		-0.00977182	0.00284401	0.00059808		0.00525238		-0.924778	1.91474	0.629145		1.73952	1.95777	0.374327		3.1888	1.91233	0.0955139		0.583069	2.17866	0.789003
			ExR	ChL		-0.0131324	0.0357187	0.71315		-0.0176677	0.00283048	4.89248e-10		0.0122879		1.82785	1.90563	0.33754		0.503459	1.94846	0.796124		6.03382	1.90323	0.00153723		1.50898	2.16829	0.486524
			EnR	Ls		-0.76947	0.0331362	2.46455e-110		0.0170081	0.00262584	1.07832e-10		0.155723		0.869761	1.76785	0.622762		1.88714	1.80758	0.296559		-0.467498	1.76563	0.791198		2.09547	2.01152	0.297615
			EnR	ChR		-0.442564	0.0350311	9.79294e-36		0.0106377	0.002776	0.000129554		0.057496		4.12645	1.86895	0.0273226		2.65479	1.91095	0.164854		1.69457	1.8666	0.364032		0.385787	2.12656	0.856054
			EnR	Li		-0.311228	0.0354449	2.6037e-18		0.0130632	0.00280879	3.44067e-06		0.0316349		-0.0420277	1.89103	0.98227		3.29184	1.93352	0.0887579		-1.02079	1.88864	0.588897		1.04633	2.15168	0.626797
			EnR	ChL		-0.334232	0.0353362	5.85939e-21		0.0146314	0.00280017	1.85196e-07		0.0290851		2.81399	1.88523	0.135627		3.07571	1.92759	0.110673		1.8152	1.88285	0.335084		2.10382	2.14507	0.326782
			EnL	Ls		-0.777626	0.0330931	9.78807e-113		0.0159489	0.00262242	1.32989e-09		0.159563		-0.818813	1.76555	0.642843		-0.705789	1.80523	0.695846		-3.34148	1.76333	0.0581844		2.47629	2.0089	0.217795
			EnL	ChR		-0.301567	0.0354916	2.94734e-17		0.0103703	0.00281249	0.000230481		0.0288974		3.74732	1.89352	0.0478994		1.96672	1.93607	0.309786		1.00134	1.89113	0.5965		-3.8276	2.15451	0.0757373
			EnL	Li		-0.335722	0.0353597	4.196e-21		0.0136238	0.00280203	1.21761e-06		0.0339584		-0.967345	1.88648	0.608142		1.31646	1.92887	0.494971		-4.19885	1.8841	0.0259119		0.913928	2.1465	0.6703
			EnL	ChL		-0.562804	0.0344661	1.25812e-57		0.01382	0.00273122	4.42982e-07		0.0831832		0.145906	1.83881	0.936761		0.963534	1.88013	0.608349		-1.86823	1.83649	0.309095		2.61145	2.09225	0.212067
			ExL	Ls		-0.455942	0.0349091	5.13287e-38		-0.0109158	0.00276633	8.1202e-05		0.0586176		-2.28962	1.86244	0.219027		0.374065	1.9043	0.844284		-3.90495	1.8601	0.0358664		3.15342	2.11915	0.136834
			ExL	ChR		-0.127706	0.0356369	0.000344064		-0.0188204	0.002824	3.11847e-11		0.0198536		1.22698	1.90127	0.518749		2.80113	1.944	0.149707		1.01482	1.89887	0.59308		-3.35061	2.16333	0.121524
			ExL	Li		-0.124794	0.0358394	0.000504297		-0.00663015	0.00284005	0.0196304		0.00533173		-1.97902	1.91207	0.300741		2.62372	1.95504	0.179683		-4.48298	1.90966	0.0189597		1.49427	2.17562	0.492244
			ExL	ChL		-0.387769	0.0352867	1.34127e-27		0.00528987	0.00279625	0.0586119		0.0383156		-0.407055	1.88259	0.828829		2.81237	1.92489	0.1441		-1.83288	1.88021	0.32972		3.01531	2.14207	0.159329
		Nose-Mouth (9 landmarks, 20 pairs)	N	Ls		-0.616018	0.0339927	6.18671e-70		0.0213736	0.00269371	2.89784e-15		0.103801		-2.10867	1.81355	0.245025		1.86539	1.8543	0.314501		-0.28338	1.81126	0.875685		1.82135	2.06352	0.377495
			N	ChR		-0.301533	0.0355182	3.13423e-17		0.00893017	0.00281459	0.00152407		0.0291766		0.762592	1.89494	0.687389		3.49836	1.93752	0.0710773		1.97712	1.89255	0.296246		-1.29139	2.15612	0.549255
			N	Li		-0.175317	0.0357119	9.60484e-07		0.0138007	0.00282994	1.13178e-06		0.0149299		-2.25564	1.90527	0.236542		2.87037	1.94809	0.140733		-1.33473	1.90287	0.483085		0.592985	2.16788	0.784462
			N	ChL		-0.360656	0.0352976	3.8829e-24		0.0123126	0.00279712	1.10834e-05		0.0368009		-1.81018	1.88317	0.336503		2.94568	1.92549	0.126156		1.25733	1.8808	0.503857		1.91044	2.14273	0.372681
			Prn	Ls		-0.421495	0.0351386	1.86315e-32		0.0106941	0.00278451	0.000125145		0.0499901		1.06286	1.87469	0.570786		-0.109855	1.91681	0.954301		-1.17799	1.87232	0.529289		3.03374	2.13308	0.155056
			Prn	ChR		0.0194349	0.0358958	0.588253		-0.0114523	0.00284452	5.80354e-05		0.00413698		-0.0537617	1.91508	0.977606		0.167351	1.95812	0.931897		-1.33218	1.91267	0.486164		-1.94282	2.17905	0.372678
			Prn	Li		0.107131	0.0359283	0.00288736		-0.00279106	0.00284709	0.327004		0.00180533		1.21044	1.91682	0.527769		-0.240296	1.95989	0.902426		-2.18192	1.9144	0.25448		0.808227	2.18102	0.71098
			Prn	ChL		0.0340795	0.0359335	0.342996		-0.00819763	0.00284751	0.00401753		0.0018695		-1.55108	1.9171	0.418531		0.760055	1.96018	0.698229		-1.30218	1.91468	0.496487		1.81703	2.18134	0.404914
			AlL	Ls		-0.860838	0.0324841	5.14115e-140		0.0151835	0.00257416	4.05495e-09		0.191035		2.15027	1.73307	0.214797		-0.847635	1.77201	0.632437		0.996523	1.73088	0.564838		0.691686	1.97194	0.725788
			AlL	ChR		-0.245202	0.0356491	7.26524e-12		0.00570689	0.00282497	0.0434503		0.0167158		2.65142	1.90192	0.163392		2.12023	1.94466	0.275672		3.16896	1.89952	0.0953562		-5.06404	2.16407	0.0193423
			AlL	Li		-0.352208	0.0353373	4.60788e-23		0.0133906	0.00280026	1.81516e-06		0.0444889		2.02223	1.88529	0.283515		1.4534	1.92765	0.45092		-1.09121	1.88291	0.562269		-0.257851	2.14514	0.904331
			AlL	ChL		-0.269095	0.0356256	5.50629e-14		0.00765469	0.00282311	0.00673514		0.0198615		2.98212	1.90067	0.116751		1.324	1.94338	0.49574		-0.366084	1.89827	0.847088		2.41616	2.16264	0.263982
			Sn	Ls		-0.53033	0.0346115	3.46906e-51		0.013499	0.00274274	9.01468e-07		0.0691175		4.88739	1.84656	0.00816688		0.435056	1.88806	0.817776		0.0950079	1.84423	0.958917		3.18726	2.10108	0.129375
			Sn	ChR		-0.102261	0.0358093	0.00432175		-0.0127702	0.00283766	7.03053e-06		0.00898801		3.04228	1.91047	0.111388		0.512764	1.9534	0.792954		0.0680408	1.90806	0.971556		-2.45713	2.17379	0.258417
			Sn	Li		-0.0197435	0.03596	0.583016		0.00290918	0.00284961	0.307376		0.000161151		3.6146	1.91851	0.0596468		1.21915	1.96162	0.534316		-1.52506	1.91609	0.426137		1.38309	2.18294	0.526393
			Sn	ChL		-0.0837567	0.0359198	0.019775		-0.00547455	0.00284642	0.0545304		0.00234976		0.660001	1.91637	0.730566		1.04876	1.95943	0.592523		-1.46736	1.91395	0.443337		3.4962	2.1805	0.108948
			AlR	Ls		-0.889391	0.0321197	2.08728e-151		0.019673	0.00254529	1.44038e-14		0.208007		2.15033	1.71363	0.209628		0.609675	1.75214	0.727892		2.31504	1.71147	0.176259		-2.18653	1.94982	0.262201
			AlR	ChR		-0.181287	0.0357912	4.31365e-07		0.00402345	0.00283623	0.156116		0.0111865		5.10202	1.9095	0.00758043		1.52003	1.95241	0.43631		0.607894	1.9071	0.749934		-3.2739	2.1727	0.131951
			AlR	Li		-0.34309	0.0353605	5.89726e-22		0.0131916	0.0028021	2.61124e-06		0.0430828		0.948879	1.88653	0.615015		1.56322	1.92892	0.417764		0.926567	1.88415	0.622916		-2.36911	2.14655	0.269815
			AlR	ChL		-0.218439	0.0356993	1.05729e-09		0.0101402	0.00282894	0.00034286		0.013649		1.53445	1.9046	0.420501		0.504425	1.9474	0.795632		3.3116	1.9022	0.0817919		-1.27854	2.16711	0.555251

## Sheet: TS4
	Table S4. Phenotype correlations between all facial phenotypes in RS
					Intra-organs landmark pairs Euclidean distances (22 pairs)																						Inter-organs landmark pairs Euclidean distances (56 pairs)
					Eyes (4 landmarks, 6 pairs)						Nose (5 landmarks, 10 pairs)										Mouth (4 landmarks, 6 pairs)						Eyes-Nose (9 landmarks, 20 pairs)																				Eyes-Mouth (8 landmarks, 16 pairs)
				L1	ExR	ExR	ExR	EnR	EnR	EnL	N	N	N	N	Prn	Prn	Prn	AlL	AlL	Sn	Ls	Ls	Ls	ChR	ChR	Li	ExR	ExR	ExR	ExR	ExR	EnR	EnR	EnR	EnR	EnR	N	Prn	EnL	EnL	EnL	N	Prn	ExL	ExL	ExL	ExR	ExR	ExR
			L1	L2	EnR	EnL	ExL	EnL	ExL	ExL	Prn	AlL	Sn	AlR	AlL	Sn	AlR	Sn	AlR	AlR	ChR	Li	ChL	Li	ChL	ChL	N	Prn	AlL	Sn	AlR	N	Prn	AlL	Sn	AlR	EnL	EnL	AlL	Sn	AlR	ExL	ExL	AlL	Sn	AlR	Ls	ChR	Li
	Intra-organs landmark pairs Euclidean distances (22 pairs)	Eyes (4 landmarks, 6 pairs)	ExR	EnR	1	0.738	0.6	0.201	0.092	-0.089	-0.15	-0.179	-0.176	-0.126	0.136	0.065	-0.052	-0.031	0.093	0.038	0.066	-0.016	0.078	0.085	0.067	0.014	0.698	0.305	0.623	0.454	0.354	-0.101	-0.157	-0.191	-0.195	-0.142	0.175	0.012	-0.267	-0.146	0.129	0.101	0.052	-0.185	-0.151	0.06	0.237	0.026	0.197
			ExR	EnL	0.738	1	0.72	0.804	0.43	-0.209	-0.318	-0.249	-0.283	-0.212	-0.007	0.04	-0.149	-0.074	0.177	-0.008	0.086	0.022	0.108	0.089	0.115	0.051	0.772	0.203	0.657	0.358	0.264	0.152	-0.268	0.022	-0.274	-0.29	0.434	-0.121	-0.404	-0.211	0.325	0.278	-0.014	-0.182	-0.145	0.171	0.085	-0.094	0.074
			ExR	ExL	0.6	0.72	1	0.506	0.841	0.513	-0.325	-0.286	-0.328	-0.287	0.033	0.061	-0.018	0	0.196	0.042	0.093	0.01	0.139	0.071	0.145	0.099	0.618	0.181	0.575	0.239	0.122	0.133	-0.217	-0.006	-0.314	-0.401	0.153	-0.181	-0.425	-0.317	0.01	0.661	0.257	0.144	0.226	0.589	-0.055	-0.184	-0.074
			EnR	EnL	0.201	0.804	0.506	1	0.54	-0.238	-0.345	-0.196	-0.25	-0.188	-0.159	-0.025	-0.204	-0.082	0.175	-0.045	0.062	0.048	0.084	0.048	0.107	0.055	0.527	0.006	0.402	0.126	0.077	0.31	-0.288	0.204	-0.229	-0.294	0.494	-0.21	-0.349	-0.176	0.365	0.318	-0.088	-0.103	-0.081	0.189	-0.088	-0.157	-0.067
			EnR	ExL	0.092	0.43	0.841	0.54	1	0.681	-0.341	-0.229	-0.293	-0.267	-0.105	-0.008	-0.049	0.01	0.188	0.02	0.069	0.029	0.122	0.024	0.14	0.113	0.35	-0.008	0.313	0.007	-0.069	0.254	-0.23	0.134	-0.276	-0.413	0.113	-0.283	-0.357	-0.303	-0.053	0.788	0.259	0.306	0.383	0.695	-0.228	-0.245	-0.225
			EnL	ExL	-0.089	-0.209	0.513	-0.238	0.681	1	-0.103	-0.077	-0.108	-0.132	-0.017	-0.012	0.09	0.083	0.063	0.061	0.02	-0.008	0.061	-0.024	0.066	0.079	-0.06	-0.044	0	-0.108	-0.148	0.037	-0.039	-0.012	-0.112	-0.213	-0.302	-0.179	-0.095	-0.194	-0.369	0.65	0.368	0.464	0.53	0.644	-0.189	-0.143	-0.207
		Nose (5 landmarks, 10 pairs)	N	Prn	-0.15	-0.318	-0.325	-0.345	-0.341	-0.103	1	0.575	0.74	0.584	0.373	0.245	0.35	0.094	-0.128	0.068	-0.125	-0.155	-0.125	-0.05	-0.149	-0.062	-0.3	0.42	-0.172	0.148	0.092	-0.166	0.65	0.073	0.46	0.384	-0.198	0.64	0.395	0.461	0.095	-0.326	0.394	0.102	0.164	-0.121	0.072	-0.038	-0.033
			N	AlL	-0.179	-0.249	-0.286	-0.196	-0.229	-0.077	0.575	1	0.736	0.791	-0.074	-0.087	-0.103	0.019	0.04	-0.008	-0.133	-0.127	-0.112	-0.09	-0.089	-0.094	-0.137	-0.104	0.007	0.007	0.057	0.068	0.051	0.392	0.267	0.353	0.052	0.022	0.513	0.25	0.164	-0.097	-0.104	0.162	0.057	-0.041	0	-0.011	-0.093
			N	Sn	-0.176	-0.283	-0.328	-0.25	-0.293	-0.108	0.74	0.736	1	0.708	-0.064	-0.068	-0.058	0.247	-0.135	0.219	-0.172	-0.12	-0.156	-0.1	-0.11	-0.106	-0.222	0.025	-0.162	0.285	0.108	-0.072	0.21	0.155	0.646	0.397	-0.106	0.194	0.447	0.65	0.139	-0.236	0.019	0.168	0.331	-0.102	0.017	-0.036	-0.068
			N	AlR	-0.126	-0.212	-0.287	-0.188	-0.267	-0.132	0.584	0.791	0.708	1	-0.103	-0.08	-0.05	-0.032	0.017	-0.033	-0.131	-0.121	-0.141	-0.085	-0.121	-0.134	-0.082	-0.1	-0.089	-0.001	0.148	0.064	0.047	0.191	0.234	0.53	-0.026	0.056	0.405	0.254	0.399	-0.204	-0.098	0.103	0.021	0.06	0.005	0.022	-0.076
			Prn	AlL	0.136	-0.007	0.033	-0.159	-0.105	-0.017	0.373	-0.074	-0.064	-0.103	1	0.7	0.839	0.262	0.139	0.199	0.058	-0.131	0.036	0.105	-0.021	0.085	-0.037	0.64	0.022	0.055	-0.144	-0.08	0.69	-0.162	0.025	-0.13	0.004	0.749	-0.185	0.035	-0.089	-0.088	0.625	-0.255	-0.045	-0.057	0.072	-0.1	-0.019
			Prn	Sn	0.065	0.04	0.061	-0.025	-0.008	-0.012	0.245	-0.087	-0.068	-0.08	0.7	1	0.663	-0.239	0.081	-0.209	0.069	-0.057	0.027	0.107	-0.036	0.069	-0.015	0.512	0.032	-0.117	-0.081	-0.026	0.516	-0.098	-0.178	-0.114	0.008	0.517	-0.166	-0.192	-0.06	-0.04	0.46	-0.141	-0.168	-0.007	-0.028	-0.103	-0.033
			Prn	AlR	-0.052	-0.149	-0.018	-0.204	-0.049	0.09	0.35	-0.103	-0.058	-0.05	0.839	0.663	1	0.206	0.099	0.288	0.063	-0.116	0.015	0.108	-0.027	0.066	-0.141	0.614	-0.087	-0.027	-0.27	-0.01	0.716	-0.134	0.052	-0.178	-0.077	0.661	-0.135	0.034	-0.17	-0.055	0.557	-0.162	0.021	-0.03	0.015	-0.119	-0.054
			AlL	Sn	-0.031	-0.074	0	-0.082	0.01	0.083	0.094	0.019	0.247	-0.032	0.262	-0.239	0.206	1	0.359	0.748	-0.039	-0.092	0.026	0.006	0.131	0.121	-0.075	0.026	0.06	0.252	-0.274	-0.043	0.11	0.097	0.436	-0.124	-0.052	0.126	-0.096	0.507	0.02	0.011	0.108	-0.217	0.424	0.091	-0.055	-0.138	-0.131
			AlL	AlR	0.093	0.177	0.196	0.175	0.188	0.063	-0.128	0.04	-0.135	0.017	0.139	0.081	0.099	0.359	1	0.395	0.092	-0.082	0.149	0.157	0.285	0.213	0.147	-0.039	0.506	-0.038	-0.355	0.068	-0.106	0.445	-0.148	-0.177	0.082	-0.1	-0.237	-0.161	0.413	0.149	-0.054	-0.42	-0.101	0.461	-0.108	-0.164	-0.13
			Sn	AlR	0.038	-0.008	0.042	-0.045	0.02	0.061	0.068	-0.008	0.219	-0.033	0.199	-0.209	0.288	0.748	0.395	1	-0.012	-0.098	0.003	0.083	0.125	0.032	-0.005	0.095	0.102	0.399	-0.309	-0.026	0.103	0.069	0.458	-0.19	-0.03	0.089	-0.107	0.398	0.055	0.02	0.042	-0.233	0.251	0.103	0	-0.109	-0.049
		Mouth (4 landmarks, 6 pairs)	Ls	ChR	0.066	0.086	0.093	0.062	0.069	0.02	-0.125	-0.133	-0.172	-0.131	0.058	0.069	0.063	-0.039	0.092	-0.012	1	0.182	0.369	0.782	0.674	0.351	0.104	0.057	0.07	-0.03	-0.056	0.086	-0.008	-0.055	-0.141	-0.15	0.083	-0.013	-0.17	-0.153	-0.04	0.091	0.011	-0.125	-0.1	0.017	-0.036	-0.301	0.028
			Ls	Li	-0.016	0.022	0.01	0.048	0.029	-0.008	-0.155	-0.127	-0.12	-0.121	-0.131	-0.057	-0.116	-0.092	-0.082	-0.098	0.182	1	0.256	0.101	0.036	0.115	0.001	-0.127	-0.063	-0.1	-0.033	-0.017	-0.17	-0.127	-0.168	-0.142	-0.024	-0.167	-0.125	-0.156	-0.123	-0.002	-0.119	-0.027	-0.084	-0.069	-0.296	-0.087	0.477
			Ls	ChL	0.078	0.108	0.139	0.084	0.122	0.061	-0.125	-0.112	-0.156	-0.141	0.036	0.027	0.015	0.026	0.149	0.003	0.369	0.256	1	0.302	0.606	0.764	0.084	-0.014	0.111	-0.057	-0.096	0.009	-0.078	-0.008	-0.162	-0.182	0.049	-0.048	-0.152	-0.128	-0.022	0.12	0.042	-0.063	-0.008	0.096	-0.251	-0.189	-0.022
			ChR	Li	0.085	0.089	0.071	0.048	0.024	-0.024	-0.05	-0.09	-0.1	-0.085	0.105	0.107	0.108	0.006	0.157	0.083	0.782	0.101	0.302	1	0.704	0.271	0.098	0.091	0.086	0.018	-0.083	0.066	0.037	-0.038	-0.079	-0.131	0.087	0.04	-0.15	-0.094	0.023	0.037	0.01	-0.157	-0.106	0.028	-0.059	-0.462	0.189
			ChR	ChL	0.067	0.115	0.145	0.107	0.14	0.066	-0.149	-0.089	-0.11	-0.121	-0.021	-0.036	-0.027	0.131	0.285	0.125	0.674	0.036	0.606	0.704	1	0.679	0.14	-0.051	0.167	-0.006	-0.149	0.116	-0.113	0.058	-0.099	-0.21	0.114	-0.1	-0.185	-0.08	0.024	0.162	-0.028	-0.143	0.007	0.134	-0.147	-0.416	-0.065
			Li	ChL	0.014	0.051	0.099	0.055	0.113	0.079	-0.062	-0.094	-0.106	-0.134	0.085	0.069	0.066	0.121	0.213	0.032	0.351	0.115	0.764	0.271	0.679	1	0.051	0	0.117	-0.073	-0.152	0.045	-0.012	0.057	-0.11	-0.193	0.023	0.005	-0.145	-0.071	-0.043	0.114	0.096	-0.096	0.046	0.094	-0.166	-0.238	-0.063
	Inter-organs landmark pairs Euclidean distances (56 pairs)	Eyes-Nose (9 landmarks, 20 pairs)	ExR	N	0.698	0.772	0.618	0.527	0.35	-0.06	-0.3	-0.137	-0.222	-0.082	-0.037	-0.015	-0.141	-0.075	0.147	-0.005	0.104	0.001	0.084	0.098	0.14	0.051	1	0.272	0.595	0.376	0.237	0.557	-0.181	0.034	-0.188	-0.264	0.499	-0.097	-0.328	-0.19	0.127	0.354	0.013	-0.159	-0.105	0.115	0.11	-0.136	0.049
			ExR	Prn	0.305	0.203	0.181	0.006	-0.008	-0.044	0.42	-0.104	0.025	-0.1	0.64	0.512	0.614	0.026	-0.039	0.095	0.057	-0.127	-0.014	0.091	-0.051	0	0.272	1	0.346	0.564	0.401	0.151	0.781	-0.011	0.253	0.046	0.125	0.729	-0.052	0.159	-0.023	-0.001	0.621	-0.027	0.082	-0.018	0.376	0.015	0.222
			ExR	AlL	0.623	0.657	0.575	0.402	0.313	0	-0.172	0.007	-0.162	-0.089	0.022	0.032	-0.087	0.06	0.506	0.102	0.07	-0.063	0.111	0.086	0.167	0.117	0.595	0.346	1	0.56	0.443	0.117	-0.119	0.465	-0.088	-0.094	0.166	-0.099	-0.14	-0.167	0.257	0.193	0.02	-0.14	-0.055	0.297	0.328	0.059	0.233
			ExR	Sn	0.454	0.358	0.239	0.126	0.007	-0.108	0.148	0.007	0.285	-0.001	0.055	-0.117	-0.027	0.252	-0.038	0.399	-0.03	-0.1	-0.057	0.018	-0.006	-0.073	0.376	0.564	0.56	1	0.672	0.067	0.198	0.117	0.555	0.166	0.125	0.193	0.045	0.424	0.125	0.006	0.156	0.048	0.257	0.017	0.509	0.176	0.363
			ExR	AlR	0.354	0.264	0.122	0.077	-0.069	-0.148	0.092	0.057	0.108	0.148	-0.144	-0.081	-0.27	-0.274	-0.355	-0.309	-0.056	-0.033	-0.096	-0.083	-0.149	-0.152	0.237	0.401	0.443	0.672	1	-0.02	0.066	0.075	0.205	0.466	0.038	0.065	0.21	0.114	0.159	-0.089	0.053	0.267	0.051	-0.035	0.557	0.361	0.448
			EnR	N	-0.101	0.152	0.133	0.31	0.254	0.037	-0.166	0.068	-0.072	0.064	-0.08	-0.026	-0.01	-0.043	0.068	-0.026	0.086	-0.017	0.009	0.066	0.116	0.045	0.557	0.151	0.117	0.067	-0.02	1	0.078	0.109	-0.021	-0.222	0.609	0.004	-0.146	-0.051	-0.039	0.402	0.067	-0.004	0.054	0.062	-0.015	-0.145	-0.082
			EnR	Prn	-0.157	-0.268	-0.217	-0.288	-0.23	-0.039	0.65	0.051	0.21	0.047	0.69	0.516	0.716	0.11	-0.106	0.103	-0.008	-0.17	-0.078	0.037	-0.113	-0.012	-0.181	0.781	-0.119	0.198	0.066	0.078	1	0.076	0.473	0.281	-0.023	0.895	0.214	0.372	-0.042	-0.168	0.655	0.027	0.152	-0.119	0.148	-0.082	-0.003
			EnR	AlL	-0.191	0.022	-0.006	0.204	0.134	-0.012	0.073	0.392	0.155	0.191	-0.162	-0.098	-0.134	0.097	0.445	0.069	-0.055	-0.127	-0.008	-0.038	0.058	0.057	0.034	-0.011	0.465	0.117	0.075	0.109	0.076	1	0.339	0.383	-0.031	-0.075	0.411	0.141	0.324	0.005	-0.106	0.049	0.062	0.195	0.015	-0.103	-0.104
			EnR	Sn	-0.195	-0.274	-0.314	-0.229	-0.276	-0.112	0.46	0.267	0.646	0.234	0.025	-0.178	0.052	0.436	-0.148	0.458	-0.141	-0.168	-0.162	-0.079	-0.099	-0.11	-0.188	0.253	-0.088	0.555	0.205	-0.021	0.473	0.339	1	0.557	-0.076	0.363	0.475	0.841	0.131	-0.21	0.139	0.153	0.44	-0.127	0.161	-0.02	0
			EnR	AlR	-0.142	-0.29	-0.401	-0.294	-0.413	-0.213	0.384	0.353	0.397	0.53	-0.13	-0.114	-0.178	-0.124	-0.177	-0.19	-0.15	-0.142	-0.182	-0.131	-0.21	-0.193	-0.264	0.046	-0.094	0.166	0.466	-0.222	0.281	0.383	0.557	1	-0.168	0.214	0.629	0.42	0.459	-0.346	-0.033	0.214	0.051	-0.029	0.182	0.141	0.052
			N	EnL	0.175	0.434	0.153	0.494	0.113	-0.302	-0.198	0.052	-0.106	-0.026	0.004	0.008	-0.077	-0.052	0.082	-0.03	0.083	-0.024	0.049	0.087	0.114	0.023	0.499	0.125	0.166	0.125	0.038	0.609	-0.023	-0.031	-0.076	-0.168	1	0.12	-0.262	0.006	0.219	0.439	0.078	-0.135	-0.061	0.001	-0.003	-0.106	-0.048
			Prn	EnL	0.012	-0.121	-0.181	-0.21	-0.283	-0.179	0.64	0.022	0.194	0.056	0.749	0.517	0.661	0.126	-0.1	0.089	-0.013	-0.167	-0.048	0.04	-0.1	0.005	-0.097	0.729	-0.099	0.193	0.065	0.004	0.895	-0.075	0.363	0.214	0.12	1	0.228	0.454	0.125	-0.173	0.727	0.003	0.148	-0.117	0.111	-0.104	-0.028
			EnL	AlL	-0.267	-0.404	-0.425	-0.349	-0.357	-0.095	0.395	0.513	0.447	0.405	-0.185	-0.166	-0.135	-0.096	-0.237	-0.107	-0.17	-0.125	-0.152	-0.15	-0.185	-0.145	-0.328	-0.052	-0.14	0.045	0.21	-0.146	0.214	0.411	0.475	0.629	-0.262	0.228	1	0.582	0.309	-0.292	0.022	0.472	0.241	-0.067	0.046	0.029	-0.063
			EnL	Sn	-0.146	-0.211	-0.317	-0.176	-0.303	-0.194	0.461	0.25	0.65	0.254	0.035	-0.192	0.034	0.507	-0.161	0.398	-0.153	-0.156	-0.128	-0.094	-0.08	-0.071	-0.19	0.159	-0.167	0.424	0.114	-0.051	0.372	0.141	0.841	0.42	0.006	0.454	0.582	1	0.308	-0.198	0.215	0.222	0.555	-0.081	0.051	-0.08	-0.091
			EnL	AlR	0.129	0.325	0.01	0.365	-0.053	-0.369	0.095	0.164	0.139	0.399	-0.089	-0.06	-0.17	0.02	0.413	0.055	-0.04	-0.123	-0.022	0.023	0.024	-0.043	0.127	-0.023	0.257	0.125	0.159	-0.039	-0.042	0.324	0.131	0.459	0.219	0.125	0.309	0.308	1	-0.068	-0.039	-0.034	-0.012	0.362	-0.017	-0.075	-0.093
			N	ExL	0.101	0.278	0.661	0.318	0.788	0.65	-0.326	-0.097	-0.236	-0.204	-0.088	-0.04	-0.055	0.011	0.149	0.02	0.091	-0.002	0.12	0.037	0.162	0.114	0.354	-0.001	0.193	0.006	-0.089	0.402	-0.168	0.005	-0.21	-0.346	0.439	-0.173	-0.292	-0.198	-0.068	1	0.369	0.292	0.421	0.613	-0.198	-0.218	-0.233
			Prn	ExL	0.052	-0.014	0.257	-0.088	0.259	0.368	0.394	-0.104	0.019	-0.098	0.625	0.46	0.557	0.108	-0.054	0.042	0.011	-0.119	0.042	0.01	-0.028	0.096	0.013	0.621	0.02	0.156	0.053	0.067	0.655	-0.106	0.139	-0.033	0.078	0.727	0.022	0.215	-0.039	0.369	1	0.395	0.554	0.385	-0.026	-0.192	-0.147
			ExL	AlL	-0.185	-0.182	0.144	-0.103	0.306	0.464	0.102	0.162	0.168	0.103	-0.255	-0.141	-0.162	-0.217	-0.42	-0.233	-0.125	-0.027	-0.063	-0.157	-0.143	-0.096	-0.159	-0.027	-0.14	0.048	0.267	-0.004	0.027	0.049	0.153	0.214	-0.135	0.003	0.472	0.222	-0.034	0.292	0.395	1	0.72	0.47	-0.079	-0.042	-0.123
			ExL	Sn	-0.151	-0.145	0.226	-0.081	0.383	0.53	0.164	0.057	0.331	0.021	-0.045	-0.168	0.021	0.424	-0.101	0.251	-0.1	-0.084	-0.008	-0.106	0.007	0.046	-0.105	0.082	-0.055	0.257	0.051	0.054	0.152	0.062	0.44	0.051	-0.061	0.148	0.241	0.555	-0.012	0.421	0.554	0.72	1	0.554	-0.128	-0.182	-0.226
			ExL	AlR	0.06	0.171	0.589	0.189	0.695	0.644	-0.121	-0.041	-0.102	0.06	-0.057	-0.007	-0.03	0.091	0.461	0.103	0.017	-0.069	0.096	0.028	0.134	0.094	0.115	-0.018	0.297	0.017	-0.035	0.062	-0.119	0.195	-0.127	-0.029	0.001	-0.117	-0.067	-0.081	0.362	0.613	0.385	0.47	0.554	1	-0.204	-0.208	-0.246
		Eyes-Mouth (8 landmarks, 16 pairs)	ExR	Ls	0.237	0.085	-0.055	-0.088	-0.228	-0.189	0.072	0	0.017	0.005	0.072	-0.028	0.015	-0.055	-0.108	0	-0.036	-0.296	-0.251	-0.059	-0.147	-0.166	0.11	0.376	0.328	0.509	0.557	-0.015	0.148	0.015	0.161	0.182	-0.003	0.111	0.046	0.051	-0.017	-0.198	-0.026	-0.079	-0.128	-0.204	1	0.468	0.568
			ExR	ChR	0.026	-0.094	-0.184	-0.157	-0.245	-0.143	-0.038	-0.011	-0.036	0.022	-0.1	-0.103	-0.119	-0.138	-0.164	-0.109	-0.301	-0.087	-0.189	-0.462	-0.416	-0.238	-0.136	0.015	0.059	0.176	0.361	-0.145	-0.082	-0.103	-0.02	0.141	-0.106	-0.104	0.029	-0.08	-0.075	-0.218	-0.192	-0.042	-0.182	-0.208	0.468	1	0.373
			ExR	Li	0.197	0.074	-0.074	-0.067	-0.225	-0.207	-0.033	-0.093	-0.068	-0.076	-0.019	-0.033	-0.054	-0.131	-0.13	-0.049	0.028	0.477	-0.022	0.189	-0.065	-0.063	0.049	0.222	0.233	0.363	0.448	-0.082	-0.003	-0.104	0	0.052	-0.048	-0.028	-0.063	-0.091	-0.093	-0.233	-0.147	-0.123	-0.226	-0.246	0.568	0.373	1
			ExR	ChL	0.391	0.328	0.252	0.127	0.054	-0.057	-0.195	-0.091	-0.17	-0.142	-0.097	-0.122	-0.151	-0.041	0.073	0	0.133	-0.01	0.377	0.115	0.342	0.287	0.262	0.126	0.522	0.376	0.41	-0.032	-0.198	0.057	-0.126	-0.105	0.014	-0.2	-0.153	-0.191	-0.062	-0.008	-0.177	-0.129	-0.163	-0.055	0.454	0.351	0.44
			EnR	Ls	-0.298	-0.434	-0.526	-0.37	-0.473	-0.214	0.276	0.206	0.234	0.196	0.034	-0.09	0.063	0.028	-0.188	0.014	-0.177	-0.364	-0.306	-0.148	-0.244	-0.219	-0.345	0.006	-0.305	-0.028	0.023	-0.12	0.308	0.178	0.426	0.489	-0.167	0.2	0.382	0.293	-0.003	-0.384	-0.111	-0.053	-0.1	-0.356	0.587	0.238	0.169
			EnR	ChR	-0.16	-0.316	-0.421	-0.306	-0.415	-0.204	0.042	0.097	0.066	0.133	-0.118	-0.147	-0.12	-0.088	-0.168	-0.082	-0.146	-0.123	-0.165	-0.307	-0.279	-0.211	-0.288	-0.252	-0.325	-0.196	-0.051	-0.239	-0.034	-0.01	0.12	0.341	-0.156	-0.066	0.199	0.046	-0.011	-0.321	-0.291	-0.124	-0.248	-0.322	0.135	0.731	0.053
			EnR	Li	-0.274	-0.375	-0.484	-0.302	-0.43	-0.229	0.13	0.082	0.115	0.08	-0.069	-0.099	-0.033	-0.058	-0.213	-0.057	-0.056	0.508	-0.077	0.072	-0.149	-0.054	-0.332	-0.129	-0.337	-0.14	-0.045	-0.174	0.12	0.055	0.228	0.32	-0.196	0.032	0.231	0.114	-0.095	-0.391	-0.233	-0.11	-0.207	-0.398	0.182	0.139	0.645
			EnR	ChL	-0.283	-0.257	-0.321	-0.112	-0.2	-0.123	-0.021	0.157	0.056	0.076	-0.235	-0.245	-0.185	-0.028	-0.074	-0.035	-0.016	-0.047	0.193	-0.039	0.109	0.083	-0.235	-0.302	-0.184	-0.187	-0.094	-0.116	-0.093	0.284	0.155	0.254	-0.153	-0.195	0.225	0.026	-0.06	-0.223	-0.358	-0.082	-0.184	-0.27	0.097	0.21	0.085
			EnL	Ls	-0.25	-0.384	-0.524	-0.337	-0.497	-0.273	0.287	0.197	0.241	0.215	0.043	-0.107	0.058	0.049	-0.197	0.022	-0.241	-0.357	-0.214	-0.147	-0.234	-0.204	-0.341	-0.05	-0.371	-0.095	-0.051	-0.139	0.233	-0.008	0.308	0.364	-0.12	0.282	0.502	0.422	0.169	-0.373	-0.051	0.01	-0.034	-0.305	0.433	0.17	0.08
			EnL	ChR	-0.063	-0.013	-0.242	0.047	-0.242	-0.304	-0.094	0.006	-0.036	0.07	-0.167	-0.172	-0.18	-0.079	-0.052	-0.049	0.168	-0.108	-0.038	0.03	0.074	-0.084	-0.093	-0.3	-0.236	-0.214	-0.132	-0.09	-0.198	-0.111	-0.073	0.09	0.045	-0.096	0.156	0.073	0.263	-0.178	-0.294	-0.145	-0.235	-0.187	-0.004	0.475	-0.045
			EnL	Li	-0.275	-0.363	-0.49	-0.283	-0.432	-0.244	0.142	0.079	0.124	0.092	-0.068	-0.12	-0.035	-0.021	-0.225	-0.064	-0.071	0.51	-0.046	-0.003	-0.134	0.04	-0.349	-0.187	-0.406	-0.218	-0.121	-0.166	0.062	-0.092	0.125	0.197	-0.183	0.1	0.357	0.238	0.029	-0.364	-0.162	-0.032	-0.113	-0.346	0.073	0.072	0.509
			EnL	ChL	-0.328	-0.483	-0.503	-0.408	-0.412	-0.105	0.142	0.227	0.172	0.193	-0.16	-0.218	-0.095	-0.042	-0.229	-0.043	-0.163	-0.077	-0.122	-0.164	-0.228	-0.253	-0.422	-0.298	-0.423	-0.258	-0.121	-0.212	-0.01	0.004	0.15	0.285	-0.307	-0.026	0.493	0.212	-0.01	-0.346	-0.26	0.063	-0.101	-0.3	0.09	0.269	0.055
			ExL	Ls	-0.26	-0.337	-0.03	-0.266	0.127	0.395	0.106	0.057	0.073	0.034	-0.016	-0.099	0.058	0.043	-0.161	-0.024	-0.237	-0.286	-0.047	-0.154	-0.144	-0.086	-0.286	-0.049	-0.257	-0.111	-0.05	-0.048	0.11	-0.063	0.1	0.084	-0.157	0.094	0.259	0.181	-0.076	0.184	0.36	0.605	0.548	0.357	0.195	0.034	-0.072
			ExL	ChR	-0.093	-0.077	0.277	-0.033	0.401	0.497	-0.201	-0.115	-0.165	-0.104	-0.136	-0.117	-0.076	-0.018	0.024	-0.021	0.286	-0.084	0.074	0.176	0.285	0.054	-0.082	-0.223	-0.119	-0.204	-0.161	0.004	-0.204	-0.145	-0.209	-0.176	-0.071	-0.211	-0.08	-0.148	-0.073	0.367	0.145	0.423	0.362	0.504	-0.169	0.168	-0.184
			ExL	Li	-0.308	-0.351	-0.086	-0.243	0.092	0.332	0.014	-0.024	0	-0.052	-0.101	-0.106	-0.018	-0.006	-0.196	-0.105	-0.065	0.459	0.036	-0.063	-0.06	0.175	-0.322	-0.17	-0.308	-0.226	-0.112	-0.078	-0.011	-0.119	-0.028	-0.029	-0.218	-0.036	0.162	0.052	-0.195	0.095	0.215	0.507	0.42	0.229	-0.072	-0.032	0.301
			ExL	ChL	-0.328	-0.422	-0.271	-0.321	-0.129	0.145	0.083	0.155	0.105	0.118	-0.163	-0.176	-0.082	-0.089	-0.28	-0.108	-0.252	-0.079	-0.289	-0.245	-0.391	-0.425	-0.4	-0.231	-0.369	-0.211	-0.029	-0.157	-0.028	-0.068	0.059	0.173	-0.25	-0.065	0.341	0.099	-0.113	-0.144	-0.007	0.482	0.246	0.063	0.053	0.253	0.015
		Nose-Mouth (9 landmarks, 20 pairs)	N	Ls	-0.268	-0.423	-0.502	-0.373	-0.452	-0.185	0.523	0.598	0.585	0.581	-0.031	-0.102	-0.012	0.005	-0.214	-0.013	-0.26	-0.325	-0.302	-0.183	-0.264	-0.25	-0.325	-0.129	-0.37	-0.111	-0.041	-0.091	0.119	-0.021	0.252	0.312	-0.137	0.091	0.35	0.252	-0.019	-0.353	-0.163	0.002	-0.075	-0.318	0.385	0.172	0.059
			N	ChR	-0.159	-0.256	-0.351	-0.219	-0.32	-0.167	0.235	0.439	0.34	0.47	-0.143	-0.118	-0.129	-0.124	-0.166	-0.116	0.06	-0.066	-0.06	-0.111	-0.111	-0.132	-0.12	-0.269	-0.333	-0.24	-0.112	0.053	-0.126	-0.152	-0.043	0.108	0.014	-0.119	0.11	-0.019	-0.054	-0.198	-0.285	-0.099	-0.225	-0.281	0.002	0.514	-0.039
			N	Li	-0.257	-0.368	-0.453	-0.302	-0.393	-0.182	0.362	0.45	0.441	0.438	-0.123	-0.117	-0.093	-0.076	-0.256	-0.094	-0.099	0.511	-0.079	-0.042	-0.191	-0.092	-0.298	-0.221	-0.392	-0.195	-0.078	-0.099	-0.024	-0.123	0.085	0.163	-0.144	-0.046	0.212	0.094	-0.121	-0.331	-0.246	-0.031	-0.15	-0.353	0.063	0.081	0.474
			N	ChL	-0.262	-0.356	-0.415	-0.276	-0.335	-0.132	0.312	0.583	0.435	0.494	-0.168	-0.173	-0.139	-0.085	-0.189	-0.081	-0.057	-0.02	0.1	-0.083	-0.061	-0.061	-0.248	-0.289	-0.346	-0.23	-0.113	-0.007	-0.089	-0.03	0.058	0.161	-0.011	-0.114	0.247	0.058	-0.097	-0.195	-0.291	-0.01	-0.157	-0.299	0.039	0.183	0.033
			Prn	Ls	-0.102	-0.196	-0.196	-0.205	-0.2	-0.06	0.027	-0.088	-0.098	-0.097	0.406	0.344	0.415	0.019	-0.153	0.02	-0.187	-0.308	-0.263	-0.122	-0.245	-0.208	-0.181	0.133	-0.281	-0.16	-0.163	-0.077	0.234	-0.245	-0.05	-0.079	-0.077	0.216	-0.069	-0.056	-0.22	-0.169	0.095	-0.123	-0.146	-0.245	0.3	0.078	0.001
			Prn	ChR	-0.029	-0.09	-0.043	-0.123	-0.066	0.01	-0.016	-0.228	-0.253	-0.223	0.475	0.47	0.524	-0.075	-0.108	-0.053	0.445	0.027	0.203	0.276	0.105	0.091	-0.09	0.282	-0.198	-0.179	-0.172	-0.025	0.303	-0.302	-0.197	-0.218	-0.034	0.263	-0.222	-0.209	-0.267	-0.052	0.203	-0.157	-0.183	-0.168	-0.06	0.072	-0.05
			Prn	Li	-0.094	-0.144	-0.158	-0.131	-0.147	-0.062	-0.133	-0.179	-0.187	-0.179	0.183	0.194	0.204	-0.085	-0.223	-0.088	0	0.575	0.025	-0.05	-0.192	-0.105	-0.155	-0.023	-0.289	-0.209	-0.133	-0.099	0.017	-0.31	-0.181	-0.161	-0.095	0.003	-0.145	-0.179	-0.282	-0.149	-0.054	-0.105	-0.194	-0.267	0.026	0.015	0.406
			Prn	ChL	0.042	-0.04	-0.026	-0.109	-0.089	-0.028	0.01	-0.189	-0.228	-0.208	0.535	0.46	0.469	-0.034	-0.082	-0.042	0.207	0.067	0.475	0.115	0.125	0.304	-0.078	0.242	-0.142	-0.149	-0.144	-0.111	0.264	-0.271	-0.189	-0.189	-0.029	0.304	-0.193	-0.174	-0.218	-0.081	0.256	-0.143	-0.164	-0.158	-0.001	-0.029	0.02
			AlL	Ls	-0.087	-0.174	-0.203	-0.177	-0.206	-0.084	-0.005	-0.1	-0.101	-0.066	0.259	0.024	0.233	0.317	0.308	0.264	-0.109	-0.279	0.026	0.017	0.008	0.013	-0.147	-0.054	-0.131	-0.185	-0.371	-0.054	0.066	-0.116	-0.062	-0.152	-0.026	0.075	-0.239	-0.05	-0.041	-0.134	-0.079	-0.46	-0.211	-0.134	0.299	0.081	0.056
			AlL	ChR	0.021	0.062	0.043	0.078	0.05	-0.01	-0.276	-0.184	-0.276	-0.162	0.012	-0.015	0.013	0.179	0.533	0.18	0.563	-0.033	0.238	0.479	0.569	0.249	0.081	-0.181	0.13	-0.208	-0.373	0.085	-0.205	0.026	-0.278	-0.304	0.117	-0.19	-0.379	-0.271	0.056	0.094	-0.195	-0.466	-0.254	0.084	-0.13	0.012	-0.106
			AlL	Li	-0.147	-0.177	-0.204	-0.127	-0.159	-0.073	-0.121	-0.212	-0.176	-0.173	0.086	-0.009	0.096	0.177	0.158	0.104	0.054	0.564	0.095	0.082	0.055	0.237	-0.167	-0.18	-0.215	-0.288	-0.37	-0.059	-0.077	-0.208	-0.191	-0.257	-0.074	-0.079	-0.307	-0.171	-0.189	-0.133	-0.168	-0.41	-0.243	-0.209	-0.012	-0.002	0.454
			AlL	ChL	-0.168	-0.204	-0.24	-0.139	-0.182	-0.083	-0.166	-0.199	-0.17	-0.135	-0.124	-0.127	-0.062	-0.071	-0.145	-0.046	0.024	0.072	0.164	-0.042	-0.046	-0.048	-0.19	-0.268	-0.372	-0.304	-0.237	-0.079	-0.163	-0.318	-0.187	-0.143	-0.057	-0.171	-0.187	-0.178	-0.229	-0.136	-0.269	-0.213	-0.261	-0.285	0.038	0.226	0.096
			Sn	Ls	-0.138	-0.218	-0.234	-0.19	-0.202	-0.061	-0.141	-0.082	-0.175	-0.069	-0.047	-0.311	-0.019	0.133	-0.171	0.133	-0.213	-0.245	-0.267	-0.176	-0.217	-0.243	-0.208	-0.232	-0.308	-0.197	-0.15	-0.128	-0.123	-0.203	-0.08	-0.029	-0.147	-0.136	-0.007	-0.08	-0.182	-0.192	-0.239	-0.111	-0.18	-0.262	0.356	0.204	0.087
			Sn	ChR	0.021	-0.029	-0.044	-0.054	-0.065	-0.03	-0.239	-0.203	-0.243	-0.183	-0.025	-0.282	-0.007	0.127	-0.108	0.229	0.504	0.064	0.19	0.335	0.265	0.047	-0.013	-0.122	-0.171	-0.029	-0.117	-0.035	-0.145	-0.265	-0.089	-0.166	-0.002	-0.139	-0.173	-0.116	-0.169	-0.026	-0.171	-0.155	-0.156	-0.171	-0.05	0.124	-0.01
			Sn	Li	-0.127	-0.164	-0.188	-0.121	-0.148	-0.063	-0.231	-0.173	-0.259	-0.157	-0.124	-0.278	-0.09	0	-0.21	-0.006	-0.022	0.631	0.009	-0.042	-0.144	-0.081	-0.173	-0.275	-0.305	-0.26	-0.147	-0.12	-0.218	-0.271	-0.222	-0.136	-0.139	-0.227	-0.107	-0.214	-0.252	-0.164	-0.276	-0.111	-0.233	-0.273	0.02	0.093	0.485
			Sn	ChL	-0.089	-0.117	-0.074	-0.088	-0.032	0.042	-0.207	-0.135	-0.183	-0.17	-0.058	-0.339	-0.041	0.272	-0.104	0.164	0.17	0.13	0.528	0.051	0.267	0.36	-0.116	-0.223	-0.199	-0.146	-0.177	-0.079	-0.17	-0.167	-0.077	-0.164	-0.085	-0.162	-0.076	-0.02	-0.216	-0.029	-0.138	-0.033	0.029	-0.131	-0.059	0.018	0.001
			AlR	Ls	-0.137	-0.195	-0.194	-0.165	-0.161	-0.038	-0.024	-0.039	-0.078	-0.149	0.201	0.028	0.244	0.255	0.29	0.343	0.021	-0.275	-0.165	0.026	0.007	-0.017	-0.142	-0.055	-0.12	-0.171	-0.456	0.004	0.063	-0.041	-0.035	-0.279	-0.045	0.023	-0.16	-0.054	-0.162	-0.11	-0.105	-0.361	-0.178	-0.162	0.463	0.105	0.118
			AlR	ChR	-0.06	-0.086	-0.131	-0.063	-0.113	-0.071	-0.226	-0.178	-0.218	-0.321	-0.066	-0.055	-0.128	-0.082	-0.098	-0.073	0.136	0.02	0.05	-0.087	-0.052	-0.036	-0.057	-0.206	-0.242	-0.254	-0.251	-0.008	-0.181	-0.278	-0.242	-0.31	0.021	-0.18	-0.221	-0.233	-0.324	-0.052	-0.231	-0.216	-0.264	-0.297	0	0.537	0.007
			AlR	Li	-0.107	-0.131	-0.165	-0.097	-0.139	-0.075	-0.145	-0.151	-0.164	-0.256	0.06	0.003	0.087	0.104	0.16	0.196	0.069	0.565	0.065	0.228	0.047	0.054	-0.118	-0.159	-0.174	-0.234	-0.425	-0.037	-0.098	-0.177	-0.182	-0.371	-0.052	-0.119	-0.253	-0.189	-0.248	-0.126	-0.215	-0.346	-0.262	-0.228	0.047	0.016	0.584
			AlR	ChL	-0.002	0.05	0.062	0.078	0.088	0.036	-0.237	-0.091	-0.204	-0.212	-0.017	-0.048	-0.052	0.19	0.557	0.245	0.251	0.044	0.598	0.239	0.566	0.541	0.051	-0.199	0.15	-0.18	-0.418	0.043	-0.222	0.099	-0.23	-0.354	0.055	-0.221	-0.276	-0.22	0.029	0.092	-0.192	-0.339	-0.164	0.133	-0.092	-0.072	-0.021
[truncated: 33 more columns]

## Sheet: TS5
	Table S5. Genetic correlation between all facial phenotypes in RS
					Intra-organs landmark pairs Euclidean distances (22 pairs)																						Inter-organs landmark pairs Euclidean distances (56 pairs)
					Eyes (4 landmarks, 6 pairs)						Nose (5 landmarks, 10 pairs)										Mouth (4 landmarks, 6 pairs)						Eyes-Nose (9 landmarks, 20 pairs)																				Eyes-Mouth (8 landmarks, 16 pairs)
				L1	ExR	ExR	ExR	EnR	EnR	EnL	N	N	N	N	Prn	Prn	Prn	AlL	AlL	Sn	Ls	Ls	Ls	ChR	ChR	Li	ExR	ExR	ExR	ExR	ExR	EnR	EnR	EnR	EnR	EnR	N	Prn	EnL	EnL	EnL	N	Prn	ExL	ExL	ExL	ExR	ExR	ExR
			L1	L2	EnR	EnL	ExL	EnL	ExL	ExL	Prn	AlL	Sn	AlR	AlL	Sn	AlR	Sn	AlR	AlR	ChR	Li	ChL	Li	ChL	ChL	N	Prn	AlL	Sn	AlR	N	Prn	AlL	Sn	AlR	EnL	EnL	AlL	Sn	AlR	ExL	ExL	AlL	Sn	AlR	Ls	ChR	Li
	Intra-organs landmark pairs Euclidean distances (22 pairs)	Eyes (4 landmarks, 6 pairs)	ExR	EnR	1	0.778	1	0.493	1	0	-0.243	0.006	-0.192	-0.464	0.305	0.001	0.35	0.236	0.119	0.754	0	-0.086	-0.462	0	0.16	0	0.696	-0.344	0.62	0.284	-0.168	-0.421	-0.444	0.519	-0.305	-0.424	-0.523	-0.867	-0.666	-0.718	-0.531	0.002	-0.632	-0.26	-0.121	0.33	-0.317	0	0
			ExR	EnL	0.778	1	1	0.897	1	0.001	-0.457	-0.43	-0.532	-0.753	0.356	0.385	0.464	0.31	0.351	0.787	0	-0.073	-0.181	0	0.261	0	0.965	-0.021	0.821	0.272	-0.336	0.113	-0.374	0.475	-0.541	-0.685	-0.052	-0.749	-0.667	-0.83	-0.35	0.011	-0.57	-0.415	-0.179	0.475	-0.302	-0.005	-0.001
			ExR	ExL	1	1	1	0.803	0.971	0.002	-0.254	-0.399	-0.4	-0.62	0.151	0.055	0.005	0.228	0.198	0.5	0	-0.241	-0.107	0	0.004	0	0.853	0.313	0.949	0.609	0.121	-0.145	-0.334	0.404	-0.41	-0.526	-0.236	-0.657	-0.63	-0.576	-0.177	0.005	-0.462	-0.22	-0.034	0.495	0.055	-0.002	0
			EnR	EnL	0.493	0.897	0.803	1	1	0	-0.591	-0.606	-0.657	-0.748	0.382	0.606	0.253	0.193	0.423	0.589	0	-0.006	0.15	0	0.231	0	0.937	0.114	0.713	0.132	-0.402	0.447	-0.465	0.417	-0.673	-0.71	0.199	-0.691	-0.709	-0.869	-0.227	0.013	-0.231	-0.412	-0.121	0.618	-0.306	-0.006	0
			EnR	ExL	1	1	0.971	1	1	0.005	-0.309	-0.537	-0.341	-0.661	-0.118	0.006	-0.597	0.054	0.236	0.251	0	-0.104	-0.109	0	-0.216	0	1	0.505	1	0.797	0.223	0.026	-0.551	0.529	-0.495	-0.577	-0.04	-0.764	-0.716	-0.602	-0.058	0.006	-0.475	-0.301	-0.152	0.5	0.363	-0.001	-0.001
			EnL	ExL	0	0.001	0.002	0	0.005	1	0	0	0.001	0	0	0	-0.002	0	-0.001	0	0	0	0	0	0	0	0	0	0	0.005	0.009	0	0	0	0	0	-0.004	0	0	0	0	0	0	0.005	0.005	0	0.009	0	0
		Nose (5 landmarks, 10 pairs)	N	Prn	-0.243	-0.457	-0.254	-0.591	-0.309	0	1	0.717	0.939	0.843	-0.327	-0.251	-0.299	-0.456	-0.373	-0.453	0	0.491	-0.559	0	-0.263	0	-0.5	0.511	-0.185	0.573	0.745	-0.283	0.652	0.02	1	0.82	-0.149	0.652	0.809	0.763	0.274	-0.001	0.818	0.83	0.669	0.478	0.008	0	0
			N	AlL	0.006	-0.43	-0.399	-0.606	-0.537	0	0.717	1	0.675	0.94	-0.32	-0.339	-0.463	-0.712	-0.065	-0.279	0	0.419	0.022	0	-0.326	0	-0.428	-0.137	-0.139	0.112	0.464	-0.409	0.13	0.401	0.431	0.839	-0.155	0.175	0.617	-0.266	0.258	0	-0.069	0.234	-0.381	-0.034	0.407	0	0
			N	Sn	-0.192	-0.532	-0.4	-0.657	-0.341	0.001	0.939	0.675	1	0.782	-0.644	-0.449	-0.761	-0.613	-0.377	-0.596	0	0.746	-0.458	0	-0.41	-0.001	-0.523	0.136	-0.346	0.458	0.664	-0.455	0.252	0.033	1	0.775	-0.358	0.437	0.626	0.518	-0.224	0	0.403	0.503	0.407	-0.026	0.04	0	0
			N	AlR	-0.464	-0.753	-0.62	-0.748	-0.661	0	0.843	0.94	0.782	1	-0.36	-0.086	-0.309	-0.613	-0.212	-0.391	0	0.718	-0.241	0	-0.478	-0.001	-0.858	-0.143	-0.425	-0.098	0.475	-0.502	0.304	0.496	0.889	1	-0.132	0.229	0.749	0.249	0.247	-0.001	-0.077	0.295	-0.18	-0.078	-0.039	0	0
			Prn	AlL	0.305	0.356	0.151	0.382	-0.118	0	-0.327	-0.32	-0.644	-0.36	1	0.678	1	0.362	0.29	0.627	0.005	-0.056	-0.252	0.004	0.356	0	0.291	0.248	0.095	-0.191	-0.574	0.153	0.015	-0.206	-0.727	-0.365	0.77	0.35	-0.549	-0.561	0.054	0	0.222	-0.491	-0.619	-0.299	-0.372	0	0
			Prn	Sn	0.001	0.385	0.055	0.606	0.006	0	-0.251	-0.339	-0.449	-0.086	0.678	1	0.878	-0.25	0.104	0.027	0	1	-0.003	0	0.546	0	0.302	0.201	0.098	0.132	-0.089	0.433	0.019	-0.001	-0.508	-0.13	0.817	0.28	-0.097	-0.302	0.841	0	0.257	0.032	-0.058	0.408	-0.598	0	0
			Prn	AlR	0.35	0.464	0.005	0.253	-0.597	-0.002	-0.299	-0.463	-0.761	-0.309	1	0.878	1	0.094	0.163	0.395	0	-0.065	-0.5	0	0.287	0	0.24	0.173	-0.145	-0.255	-0.506	0.087	-0.106	-1	-1	-0.517	1	0.598	-0.74	-0.763	0.145	0	0.277	-0.669	-1	-0.71	-0.112	0	0
			AlL	Sn	0.236	0.31	0.228	0.193	0.054	0	-0.456	-0.712	-0.613	-0.613	0.362	-0.25	0.094	1	0.266	0.604	0	-0.026	-0.517	0	0.173	0.001	0.279	-0.054	0.08	-0.238	-0.589	0.021	-0.137	-0.421	-0.659	-0.545	0.353	0.079	-0.918	-0.3	-0.254	0	-0.074	-0.788	-0.449	-0.48	-0.189	-0.004	0
			AlL	AlR	0.119	0.351	0.198	0.423	0.236	-0.001	-0.373	-0.065	-0.377	-0.212	0.29	0.104	0.163	0.266	1	0.878	0	-0.17	0.29	0.003	0.499	0.001	0.139	-0.516	0.605	-0.325	-0.628	-0.097	-0.48	0.686	-0.571	-0.35	0.075	-0.569	-0.37	-0.618	0.821	0.001	-0.768	-0.733	-0.687	0.508	-0.499	-0.003	-0.001
			Sn	AlR	0.754	0.787	0.5	0.589	0.251	0	-0.453	-0.279	-0.596	-0.391	0.627	0.027	0.395	0.604	0.878	1	0	-0.603	-0.011	0.006	0.584	0	0.704	-0.222	0.446	-0.327	-0.916	-0.302	-0.579	-0.042	-1	-0.644	0.641	0.022	-0.792	-0.403	0.972	0	-0.212	-1	-0.921	0.096	-0.498	-0.003	0
		Mouth (4 landmarks, 6 pairs)	Ls	ChR	0	0	0	0	0	0	0	0	0	0	0.005	0	0	0	0	0	1	0	0	0	0.001	0	0.001	0	0	0	0	0	0	0	0	0	0	0	-0.004	0	0	0	0	-0.003	0	0	0	0	0
			Ls	Li	-0.086	-0.073	-0.241	-0.006	-0.104	0	0.491	0.419	0.746	0.718	-0.056	1	-0.065	-0.026	-0.17	-0.603	0	1	0.839	0	-0.922	0	0.108	0.156	-0.352	-0.244	0.263	0.027	0.532	0.128	0.403	0.515	-0.282	0.335	0.305	0.667	0.21	0	0.563	-0.002	0.073	-0.581	-0.338	0	0
			Ls	ChL	-0.462	-0.181	-0.107	0.15	-0.109	0	-0.559	0.022	-0.458	-0.241	-0.252	-0.003	-0.5	-0.517	0.29	-0.011	0	0.839	1	0.002	0.771	0.001	-0.262	-0.7	-0.181	-0.732	-0.553	0.412	-0.078	0.267	-0.687	-0.123	0.026	-0.695	-0.138	-1	-0.157	0	-0.943	-0.225	-0.607	-0.044	-0.43	0	0
			ChR	Li	0	0	0	0	0	0	0	0	0	0	0.004	0	0	0	0.003	0.006	0	0	0.002	1	0.01	0	0	0	0	0	-0.001	0	0	0	0	0	0	0	-0.001	0	0	0	0	-0.004	0	0	0	0	0
			ChR	ChL	0.16	0.261	0.004	0.231	-0.216	0	-0.263	-0.326	-0.41	-0.478	0.356	0.546	0.287	0.173	0.499	0.584	0.001	-0.922	0.771	0.01	1	0.015	0.332	0.209	0.058	-0.161	-0.662	0.603	0.301	0.078	-0.332	-0.431	0.74	-0.19	-0.732	-0.945	-0.429	0	-0.249	-0.617	-0.639	-0.736	-0.167	0	0
			Li	ChL	0	0	0	0	0	0	0	0	-0.001	-0.001	0	0	0	0.001	0.001	0	0	0	0.001	0	0.015	1	0	0	0	0	-0.004	0	0	0	0	-0.002	0	0	-0.003	0	0	0	0	0	0	0	-0.001	0	0
	Inter-organs landmark pairs Euclidean distances (56 pairs)	Eyes-Nose (9 landmarks, 20 pairs)	ExR	N	0.696	0.965	0.853	0.937	1	0	-0.5	-0.428	-0.523	-0.858	0.291	0.302	0.24	0.279	0.139	0.704	0.001	0.108	-0.262	0	0.332	0	1	0.04	0.695	0.401	-0.105	0.256	-0.553	0.377	-0.342	-0.643	0.056	-0.985	-0.863	-0.828	-0.661	0.014	-0.214	-0.433	-0.172	-0.011	-0.063	-0.005	0
			ExR	Prn	-0.344	-0.021	0.313	0.114	0.505	0	0.511	-0.137	0.136	-0.143	0.248	0.201	0.173	-0.054	-0.516	-0.222	0	0.156	-0.7	0	0.209	0	0.04	1	0.04	0.901	0.614	0.448	0.608	-0.064	0.606	0.127	0.361	0.361	-0.096	0.139	-0.544	0	1	0.999	1	0.675	0.095	0	0
			ExR	AlL	0.62	0.821	0.949	0.713	1	0	-0.185	-0.139	-0.346	-0.425	0.095	0.098	-0.145	0.08	0.605	0.446	0	-0.352	-0.181	0	0.058	0	0.695	0.04	1	0.413	-0.088	-0.11	-0.327	0.948	-0.433	-0.321	-0.262	-0.728	-0.505	-1	0.079	0.007	-0.186	-0.121	0.13	1	-0.186	-0.002	-0.001
			ExR	Sn	0.284	0.272	0.609	0.132	0.797	0.005	0.573	0.112	0.458	-0.098	-0.191	0.132	-0.255	-0.238	-0.325	-0.327	0	-0.244	-0.732	0	-0.161	0	0.401	0.901	0.413	1	0.672	-0.057	0.403	0.372	0.521	0.036	-0.271	0.242	-0.083	0.147	-0.794	0	0.739	0.652	1	0.544	0.324	-0.001	0.001
			ExR	AlR	-0.168	-0.336	0.121	-0.402	0.223	0.009	0.745	0.464	0.664	0.475	-0.574	-0.089	-0.506	-0.589	-0.628	-0.916	0	0.263	-0.553	-0.001	-0.662	-0.004	-0.105	0.614	-0.088	0.672	1	-0.098	0.5	0.284	0.913	0.706	-0.579	0.207	0.531	0.379	-0.66	0	0.701	0.956	1	0.518	0.493	0.003	0.003
			EnR	N	-0.421	0.113	-0.145	0.447	0.026	0	-0.283	-0.409	-0.455	-0.502	0.153	0.433	0.087	0.021	-0.097	-0.302	0	0.027	0.412	0	0.603	0	0.256	0.448	-0.11	-0.057	-0.098	1	0.177	0.028	-0.095	-0.12	1	0.114	-0.405	-0.303	-0.336	0.01	0.833	-0.142	-0.034	-0.485	0.15	0	0
			EnR	Prn	-0.444	-0.374	-0.334	-0.465	-0.551	0	0.652	0.13	0.252	0.304	0.015	0.019	-0.106	-0.137	-0.48	-0.579	0	0.532	-0.078	0	0.301	0	-0.553	0.608	-0.327	0.403	0.5	0.177	1	-0.38	0.613	0.456	0.433	1	0.51	0.786	0.203	0	1	0.518	0.511	-0.135	0.307	0	0
			EnR	AlL	0.519	0.475	0.404	0.417	0.529	0	0.02	0.401	0.033	0.496	-0.206	-0.001	-1	-0.421	0.686	-0.042	0	0.128	0.267	0	0.078	0	0.377	-0.064	0.948	0.372	0.284	0.028	-0.38	1	-0.341	0.12	0.012	-0.464	-0.049	-0.772	0.82	0	-0.258	-0.172	-0.155	1	0.408	0	0
			EnR	Sn	-0.305	-0.541	-0.41	-0.673	-0.495	0	1	0.431	1	0.889	-0.727	-0.508	-1	-0.659	-0.571	-1	0	0.403	-0.687	0	-0.332	0	-0.342	0.606	-0.433	0.521	0.913	-0.095	0.613	-0.341	1	0.724	-0.06	1	0.596	0.854	-0.388	0	0.911	0.455	0.696	-0.572	0.398	0	0
			EnR	AlR	-0.424	-0.685	-0.526	-0.71	-0.577	0	0.82	0.839	0.775	1	-0.365	-0.13	-0.517	-0.545	-0.35	-0.644	0	0.515	-0.123	0	-0.431	-0.002	-0.643	0.127	-0.321	0.036	0.706	-0.12	0.456	0.12	0.724	1	-0.192	0.327	0.788	0.54	0.302	-0.005	0.085	0.442	0.221	-0.096	0.333	0.003	0.001
			N	EnL	-0.523	-0.052	-0.236	0.199	-0.04	-0.004	-0.149	-0.155	-0.358	-0.132	0.77	0.817	1	0.353	0.075	0.641	0	-0.282	0.026	0	0.74	0	0.056	0.361	-0.262	-0.271	-0.579	1	0.433	0.012	-0.06	-0.192	1	0.415	-0.308	-0.248	-0.235	0.007	0.368	-0.519	-0.542	-0.648	-0.201	-0.001	0
			Prn	EnL	-0.867	-0.749	-0.657	-0.691	-0.764	0	0.652	0.175	0.437	0.229	0.35	0.28	0.598	0.079	-0.569	0.022	0	0.335	-0.695	0	-0.19	0	-0.985	0.361	-0.728	0.242	0.207	0.114	1	-0.464	1	0.327	0.415	1	0.51	0.942	-0.14	0	0.928	0.527	0.449	-0.465	0.144	0	0
			EnL	AlL	-0.666	-0.667	-0.63	-0.709	-0.716	0	0.809	0.617	0.626	0.749	-0.549	-0.097	-0.74	-0.918	-0.37	-0.792	-0.004	0.305	-0.138	-0.001	-0.732	-0.003	-0.863	-0.096	-0.505	-0.083	0.531	-0.405	0.51	-0.049	0.596	0.788	-0.308	0.51	1	0.456	0.36	-0.006	0.257	0.684	0.208	-0.137	0.561	0	0
			EnL	Sn	-0.718	-0.83	-0.576	-0.869	-0.602	0	0.763	-0.266	0.518	0.249	-0.561	-0.302	-0.763	-0.3	-0.618	-0.403	0	0.667	-1	0	-0.945	0	-0.828	0.139	-1	0.147	0.379	-0.303	0.786	-0.772	0.854	0.54	-0.248	0.942	0.456	1	-0.423	0	0.77	0.312	0.5	-0.577	0.355	0	0
			EnL	AlR	-0.531	-0.35	-0.177	-0.227	-0.058	0	0.274	0.258	-0.224	0.247	0.054	0.841	0.145	-0.254	0.821	0.972	0	0.21	-0.157	0	-0.429	0	-0.661	-0.544	0.079	-0.794	-0.66	-0.336	0.203	0.82	-0.388	0.302	-0.235	-0.14	0.36	-0.423	1	0	-0.572	-0.568	-0.909	0.362	-0.414	0	0
			N	ExL	0.002	0.011	0.005	0.013	0.006	0	-0.001	0	0	-0.001	0	0	0	0	0.001	0	0	0	0	0	0	0	0.014	0	0.007	0	0	0.01	0	0	0	-0.005	0.007	0	-0.006	0	0	1	-0.006	-0.003	-0.006	-0.009	0.001	0	0
			Prn	ExL	-0.632	-0.57	-0.462	-0.231	-0.475	0	0.818	-0.069	0.403	-0.077	0.222	0.257	0.277	-0.074	-0.768	-0.212	0	0.563	-0.943	0	-0.249	0	-0.214	1	-0.186	0.739	0.701	0.833	1	-0.258	0.911	0.085	0.368	0.928	0.257	0.77	-0.572	-0.006	1	0.822	0.785	-0.659	0.294	0.002	0
			ExL	AlL	-0.26	-0.415	-0.22	-0.412	-0.301	0.005	0.83	0.234	0.503	0.295	-0.491	0.032	-0.669	-0.788	-0.733	-1	-0.003	-0.002	-0.225	-0.004	-0.617	0	-0.433	0.999	-0.121	0.652	0.956	-0.142	0.518	-0.172	0.455	0.442	-0.519	0.527	0.684	0.312	-0.568	-0.003	0.822	1	0.743	-0.019	0.939	0	0.001
			ExL	Sn	-0.121	-0.179	-0.034	-0.121	-0.152	0.005	0.669	-0.381	0.407	-0.18	-0.619	-0.058	-1	-0.449	-0.687	-0.921	0	0.073	-0.607	0	-0.639	0	-0.172	1	0.13	1	1	-0.034	0.511	-0.155	0.696	0.221	-0.542	0.449	0.208	0.5	-0.909	-0.006	0.785	0.743	1	-0.125	1	0.005	0.007
			ExL	AlR	0.33	0.475	0.495	0.618	0.5	0	0.478	-0.034	-0.026	-0.078	-0.299	0.408	-0.71	-0.48	0.508	0.096	0	-0.581	-0.044	0	-0.736	0	-0.011	0.675	1	0.544	0.518	-0.485	-0.135	1	-0.572	-0.096	-0.648	-0.465	-0.137	-0.577	0.362	-0.009	-0.659	-0.019	-0.125	1	0.593	0	0
		Eyes-Mouth (8 landmarks, 16 pairs)	ExR	Ls	-0.317	-0.302	0.055	-0.306	0.363	0.009	0.008	0.407	0.04	-0.039	-0.372	-0.598	-0.112	-0.189	-0.499	-0.498	0	-0.338	-0.43	0	-0.167	-0.001	-0.063	0.095	-0.186	0.324	0.493	0.15	0.307	0.408	0.398	0.333	-0.201	0.144	0.561	0.355	-0.414	0.001	0.294	0.939	1	0.593	1	-0.002	0.008
			ExR	ChR	0	-0.005	-0.002	-0.006	-0.001	0	0	0	0	0	0	0	0	-0.004	-0.003	-0.003	0	0	0	0	0	0	-0.005	0	-0.002	-0.001	0.003	0	0	0	0	0.003	-0.001	0	0	0	0	0	0.002	0	0.005	0	-0.002	1	0
			ExR	Li	0	-0.001	0	0	-0.001	0	0	0	0	0	0	0	0	0	-0.001	0	0	0	0	0	0	0	0	0	-0.001	0.001	0.003	0	0	0	0	0.001	0	0	0	0	0	0	0	0.001	0.007	0	0.008	0	1
			ExR	ChL	0.008	0.305	0.514	0.357	0.759	0	-0.535	0.022	-0.183	-0.383	-0.879	-0.701	-0.4	-0.356	-0.106	-0.543	0	-0.146	0.608	0	0.626	0	0.358	-0.461	0.19	-0.093	-0.012	0.224	-0.525	0.543	-0.452	-0.22	-0.464	-1	-0.012	-0.831	-0.716	0	-0.764	0.601	0.765	0.606	-0.094	0	-0.003
			EnR	Ls	-0.315	-0.529	-0.518	-0.576	-0.58	0	0.133	0.57	0.206	0.545	-0.215	-0.622	-0.359	-0.23	-0.316	-0.464	0	0.075	0.063	0	-0.106	-0.001	-0.449	-0.141	-0.333	-0.14	0.304	0.11	0.272	-0.038	0.366	0.507	0.123	0.446	0.736	0.535	0.244	-0.006	-0.108	0.296	0.139	-0.424	0.935	0.001	0.006
			EnR	ChR	-1	-1	-0.999	-0.999	-0.999	0	1	0.999	1	0.999	0.001	0.121	0.003	-0.999	-0.091	-0.226	0	0.395	0.999	0	0.555	0	-1	0.966	-1	-0.999	0.23	-0.552	0	-0.84	-0.177	0.999	-0.364	0	0.999	0.743	1	0	0.065	0.068	-0.698	-0.044	0.257	0	0
			EnR	Li	-0.636	-0.853	-0.746	-0.882	-0.715	0.001	0.384	0.576	0.62	0.795	-0.492	-0.317	-0.38	-0.032	-0.249	-0.919	0	0.582	0.403	0	-0.519	0	-0.636	-0.611	-0.853	-0.742	-0.105	-0.124	0.398	-0.063	0.576	0.685	-0.263	0.418	0.75	0.682	-0.002	-0.003	0.094	0.052	0.207	-0.62	0.305	0	0.005
			EnR	ChL	-0.261	-0.22	-0.301	-0.188	-0.313	0	-0.164	0.278	0.113	0.389	-0.498	-0.565	-0.379	-0.33	-0.065	-0.651	0	0.825	0.828	0	0.225	0	-0.082	-0.524	-0.232	-0.493	-0.127	0.279	-0.205	-0.01	-0.132	0.163	-0.097	-0.325	0.305	-0.148	0.053	-0.002	-0.589	0.119	0.025	-0.368	0.044	0	0
			EnL	Ls	-0.504	-0.635	-0.587	-0.657	-0.69	-0.001	0.054	0.221	-0.047	0.113	-0.234	-0.342	-0.106	-0.099	-0.158	-0.112	-0.001	0.222	-0.09	0	-0.254	-0.002	-0.724	-0.433	-0.448	-0.434	-0.123	-0.3	0.311	-0.109	0.169	0.341	-0.19	0.412	0.719	0.477	0.183	-0.009	-0.273	0.128	-0.152	-0.588	0.629	0	0.002
			EnL	ChR	0	0	-0.002	-0.001	-0.003	0	0	0	0	0	0.005	0.005	0.014	0	0	0.005	0	0	0	0	0	0	0	0	-0.003	-0.003	-0.001	0	0	0	0	0	0	0	0	0	0	0	0	-0.001	-0.007	0	0	0	0
			EnL	Li	-0.672	-0.782	-0.769	-0.8	-0.823	0	0.257	0.194	0.275	0.347	-0.291	0.055	0.044	0.265	-0.188	-0.408	0	0.429	0.055	0	-1	0	-0.702	-0.51	-0.809	-0.707	-0.262	-0.24	0.515	-0.214	0.422	0.466	-0.277	0.499	0.713	0.697	0.038	-0.009	-0.016	-0.017	-0.026	-0.85	0.165	0	0.004
			EnL	ChL	-0.506	-0.54	-0.596	-0.519	-0.743	-0.001	0.119	0.306	0.238	0.324	-0.422	-0.459	-0.118	-0.357	-0.221	-0.411	-0.001	0.502	0.325	-0.001	-0.476	-0.001	-0.509	-0.522	-0.519	-0.531	-0.106	-0.333	0.005	-0.237	0.113	0.338	-0.336	0.123	0.695	0.389	0.088	-0.011	-0.451	0.219	-0.196	-0.774	0.205	0.003	0.001
			ExL	Ls	-0.344	-0.484	-0.375	-0.501	-0.522	0.001	0.455	0.143	0.152	0.024	-0.325	-0.336	-0.272	-0.054	-0.305	-0.518	-0.002	-0.332	0.099	0	-0.297	0	-0.707	0.255	-0.056	0.248	0.407	-0.421	0.443	-0.092	0.19	0.21	-0.623	0.458	0.639	0.624	-0.388	-0.006	0.286	0.596	0.433	-0.133	1	0	0
			ExL	ChR	0	0	0.001	0	-0.001	0	0.005	0	0	0	0.001	0	0	0	0	0	0	0	0	0	0	0	0	0.006	0	0	0.001	0	0	0	0	-0.001	0	0	0	0	0	0	0	0.003	0.001	0.001	0.007	0	0
			ExL	Li	-0.887	-1	-1	-1	-1	0	0.712	0.13	0.467	0.316	-0.755	-0.616	-0.75	0.42	-0.815	-1	0	-0.642	-0.344	0	-0.999	0	-1	0.403	-0.823	-0.125	0.534	-0.589	0.999	-0.36	0.705	0.772	-1	0.968	1	1	-0.978	0	0.882	0.76	0.89	-0.899	1	0	0
			ExL	ChL	-0.427	-0.566	-0.562	-0.592	-0.675	0	0.423	0.253	0.334	0.344	-0.307	-0.474	-0.086	-0.16	-0.407	-0.758	-0.001	-0.112	0.336	-0.004	-0.478	-0.001	-0.628	-0.02	-0.376	0.027	0.417	-0.462	0.187	-0.251	0.397	0.432	-0.625	0.389	0.791	0.82	-0.128	-0.007	0.176	0.586	0.341	-0.421	0.74	0.006	0
		Nose-Mouth (9 landmarks, 20 pairs)	N	Ls	-0.28	-0.705	-0.572	-0.86	-0.67	0	0.479	0.844	0.519	0.677	-0.319	-0.661	-0.255	-0.261	-0.398	-0.383	0.001	0.482	-0.077	0	0.011	-0.001	-0.633	-0.103	-0.463	0.066	0.388	-0.14	0.331	0.108	0.788	0.844	0.05	0.532	0.947	0.72	0.049	-0.003	-0.04	0.474	0.103	-0.358	0.718	0	0
			N	ChR	-0.544	-0.826	-0.687	-0.825	-0.639	0	0.719	1	0.599	1	0.576	0.429	0.999	-0.433	-0.067	0.114	0	0.188	0.298	0	0.363	0	-0.787	0.433	-0.787	-0.391	0.058	-0.171	0.405	-0.12	0.218	0.932	0.212	0.531	0.519	-0.114	0.311	0	0.165	0.027	-0.546	-0.147	-0.089	0.004	0
			N	Li	-0.537	-0.8	-0.758	-0.793	-0.802	0	0.559	0.696	0.694	0.634	-0.312	-0.204	-0.094	-0.006	-0.188	-0.422	0	0.73	0.314	0	-0.484	0	-0.713	-0.352	-0.765	-0.393	-0.087	-0.27	0.552	0.177	0.893	0.729	-0.198	0.515	0.685	0.648	-0.055	-0.004	-0.153	-0.03	-0.136	-0.802	0.122	0	0.001
			N	ChL	-0.46	-0.571	-0.61	-0.598	-0.685	0	0.299	0.645	0.402	0.483	-0.319	-0.475	0.055	-0.382	-0.398	-0.291	0	0.807	0.635	0	0.081	0	-0.455	-0.21	-0.655	-0.286	-0.06	0.041	0.312	-0.151	0.525	0.493	-0.045	0.223	0.528	0.196	-0.305	-0.003	-0.327	0.189	-0.255	-0.843	0.147	0.004	0
			Prn	Ls	-0.32	-0.14	-0.277	-0.061	-0.315	0	-0.685	-0.181	-0.713	-0.485	0.632	0.353	1	0.255	-0.104	0.165	0	-0.089	0.212	0	0.371	0.001	-0.109	-0.277	-0.319	-0.586	-0.531	0.305	0.055	-0.223	-0.269	-0.29	0.457	0.105	0.049	0.025	-0.03	0	-0.647	-0.221	-0.462	-0.558	0.271	0	0
			Prn	ChR	0.021	-0.057	-0.246	-0.036	-0.35	0	-0.277	0.118	-0.401	-0.006	0.999	0.999	0.999	0.32	0.229	1	0	0.369	0.184	0	0.501	0	0.207	0.506	-0.42	-0.47	-0.621	0.187	0.356	-0.561	-0.314	-0.144	0.752	0.489	-0.305	-0.185	0.759	0	-0.021	-0.574	-0.943	0.035	-0.389	0	0
			Prn	Li	-0.33	-0.255	-0.367	-0.143	-0.375	0	-0.41	-0.021	-0.201	-0.238	0.331	0.318	0.452	0.075	-0.062	-0.109	0	0.459	0.364	0	-0.293	0	-0.282	-0.431	-0.432	-0.714	-0.456	-0.03	-0.017	-0.153	-0.097	-0.133	-0.079	-0.082	-0.015	-0.009	-0.13	-0.002	-0.603	-0.322	-0.576	-0.755	0.152	0	0.001
			Prn	ChL	-0.519	-0.292	-0.469	-0.066	-0.492	0	-0.557	-0.045	-0.533	-0.37	0.744	0.582	1	-0.279	-0.206	0.226	0.003	0.955	0.311	0	0.084	0	-0.239	-0.097	-0.713	-0.851	-0.704	0.383	0.107	-0.401	-0.089	-0.204	0.356	-0.106	-0.04	-0.186	-0.112	0	-0.86	-0.314	-0.953	-0.801	-0.439	0	0
			AlL	Ls	-0.105	-0.035	-0.125	-0.028	-0.244	0	-0.661	-0.107	-0.656	-0.367	0.354	-0.38	0.474	0.765	0.497	0.435	0	-0.308	0.241	0	0.624	0	-0.288	-0.807	0.065	-0.76	-0.772	-0.239	-0.228	0.155	-0.657	-0.286	0.133	0.006	-0.05	-0.134	0.399	0	-0.679	-0.629	-0.602	-0.357	0	0	0
			AlL	ChR	0.102	0.227	-0.012	0.286	-0.068	0	-0.224	-0.064	-0.316	-0.083	1	0.705	1	0.732	0.962	0.999	0.002	-0.799	0.407	0.008	0.697	0.003	0.245	0.103	0.192	-0.329	-0.88	0.142	-0.025	0.182	-0.304	-0.289	0.727	-0.041	-0.7	-0.457	0.805	0	-0.283	-1	-0.999	-0.141	-0.476	0	0
			AlL	Li	-0.228	-0.093	-0.237	-0.051	-0.242	0	-0.458	-0.292	-0.313	-0.329	0.414	0.062	0.687	1	0.316	0.105	0	-0.172	0.077	0	-0.222	0	0.006	-0.456	-0.292	-0.965	-0.95	0.125	0.205	-0.013	-0.211	-0.258	0.176	0.17	-0.312	0.059	-0.02	0	-0.158	-0.786	-0.383	-0.86	-0.478	0	-0.003
			AlL	ChL	-0.644	-0.29	-0.499	-0.045	-0.425	0	-0.53	-0.215	-0.138	-0.329	-0.023	-0.467	0.495	0.205	-0.199	0.015	0	0.612	0.854	0	0.224	0	-0.232	-0.593	-0.648	-0.674	-0.577	0.356	-0.043	-0.322	0.326	-0.074	0.055	-0.005	0.196	0.622	-0.162	-0.001	-0.677	-0.098	-0.158	-0.974	-0.294	0	0
			Sn	Ls	-0.209	-0.224	-0.305	-0.253	-0.36	0	-0.534	0.002	-0.461	-0.368	0	-0.249	0.181	0.217	-0.114	0.028	0	-0.433	0.103	0	0.097	0.001	-0.294	-0.638	-0.192	-0.592	-0.322	-0.066	-0.069	-0.12	-0.289	-0.144	-0.03	-0.097	0.23	-0.134	-0.17	-0.004	-0.909	-0.176	-0.539	-0.64	0.63	0.001	0
			Sn	ChR	0.9	0.021	0	-0.004	0	0	-0.572	0.992	-0.859	0.024	0.004	0.006	0	0.799	0.001	0.999	0	0	0	0	0.003	0	0.745	0.999	0.017	-0.042	-0.996	-0.017	0.991	0	-0.999	-0.001	0	0.77	-0.549	-1	0.997	0	0	-0.942	-0.999	0	0.999	0	0
			Sn	Li	-0.092	-0.156	-0.396	-0.188	-0.466	0	-0.353	0.022	-0.285	-0.213	0.182	0.095	0.306	0.245	-0.095	-0.084	0	-0.026	0.686	0	-0.312	0	-0.225	-0.733	-0.342	-0.729	-0.408	-0.139	-0.05	-0.156	-0.235	-0.133	-0.024	-0.06	0.082	0.078	-0.073	-0.002	-0.871	-0.429	-0.629	-0.949	0.46	0	0.002
			Sn	ChL	-0.394	-0.175	-0.187	0.014	-0.142	0	-0.821	-0.383	-0.664	-0.572	-0.145	-0.363	0.241	-0.049	-0.193	-0.143	0.001	0.356	0.84	0	0.392	0.009	-0.103	-0.606	-0.532	-0.891	-0.712	0.501	-0.068	-0.415	-0.608	-0.405	0.049	-0.503	-0.343	-0.859	-0.734	0	-1	-0.365	-0.662	-0.779	-0.088	0	0
			AlR	Ls	0.004	0.154	-0.081	0.171	-0.12	0	-0.712	-0.094	-0.577	-0.517	0.316	-0.548	0.169	0.511	0.256	0.451	0	-0.244	0.241	0	0.55	0	0.083	-0.618	-0.084	-0.581	-0.725	0.104	-0.329	-0.152	-0.712	-0.483	0.431	0.065	-0.097	-0.1	0.595	0	-0.634	-0.405	-0.465	-0.342	0.271	0	0
			AlR	ChR	-0.967	0	0	0	0	0	-0.004	0	-0.002	-0.001	0.006	0	0.006	0	0	0	0	0	0	0	0	0	-0.21	0	-0.003	-0.004	-0.005	0	-0.001	-0.005	-0.009	-0.005	0	-0.001	-0.003	-0.006	0	0	0	-0.003	-0.006	0	0	0	0
			AlR	Li	0.063	0.115	-0.038	0.082	-0.02	0	-0.511	-0.285	-0.329	-0.524	0.226	0.3	0.308	0.39	0.362	0.13	0	0.144	0.57	0	0.308	0	0.169	-0.645	-0.237	-0.96	-1	0.079	-0.195	-0.146	-0.574	-0.497	0.17	-0.004	-0.227	-0.188	0.21	0	-0.301	-0.656	-0.606	-0.438	-0.25	0	0.001
			AlR	ChL	-0.339	0.127	-0.07	0.338	0.016	0	-0.661	-0.147	-0.44	-0.453	0.011	-0.128	0.22	0.117	0.485	0.446	0.004	0.407	1	0.007	1	0.008	0	-0.66	-0.003	-0.591	-0.843	0.335	-0.479	0.056	-0.681	-0.613	0.17	-0.731	-0.346	-0.654	0.02	0	-0.995	-0.468	-0.51	-0.122	-0.625	0	0
[truncated: 33 more columns]

## Sheet: TS6
	Table S6. Twins heritability and SNP-based heritability of all facial phenotypes in TwinsUK and QIMR
	Bar chart : ranged from 0 to 1
						Twins heritability			SNP-based heritability
						TwinsUK	QIMR		TwinsUK				QIMR
			L1	L2	_	Mean	Mean	_	L95	Mean	U95	_	L95	Mean	U95
	Intra-organs landmark pairs Euclidean distances (22 pairs)	Eyes (4 landmarks, 6 pairs)	ExR	EnR		0.31	0.25		0.01	0.15	0.29		0.23	0.33	0.43
			ExR	EnL		0.69	0.87		0.36	0.48	0.6		0.61	0.67	0.74
			ExR	ExL		0.73	0.82		0.44	0.55	0.66		0.61	0.67	0.74
			EnR	EnL		0.55	0.7		0.29	0.42	0.55		0.54	0.61	0.68
			EnR	ExL		0.51	0.77		0.28	0.41	0.53		0.6	0.66	0.73
			EnL	ExL		0.31	0.29		0.08	0.22	0.36		0.25	0.35	0.45
		Nose (5 landmarks, 10 pairs)	N	Prn		0.59	0.62		0.22	0.34	0.46		0.49	0.57	0.65
			N	AlL		0.59	0.52		0.16	0.3	0.43		0.28	0.38	0.49
			N	Sn		0.65	0.73		0.31	0.43	0.56		0.39	0.49	0.58
			N	AlR		0.86	0.39		0.25	0.38	0.51		0.22	0.33	0.44
			Prn	AlL		0.67	0.32		0.38	0.49	0.59		0.18	0.29	0.4
			Prn	Sn		0.41	0.19		0.26	0.38	0.5		0.37	0.46	0.55
			Prn	AlR		0.62	0.15		0.33	0.46	0.6		0.18	0.28	0.39
			AlL	Sn		0.33	0.47		0.15	0.28	0.4		0.29	0.39	0.49
			AlL	AlR		0.76	0.58		0.53	0.62	0.72		0.47	0.54	0.62
			Sn	AlR		0.17	0.46		0.14	0.28	0.41		0.31	0.4	0.5
		Mouth (4 landmarks, 6 pairs)	Ls	ChR		0.48	0.29		0.12	0.25	0.39		0.3	0.39	0.48
			Ls	Li		0.21	0.68		0	0.09	0.23		0.36	0.46	0.56
			Ls	ChL		0.34	0.57		0.18	0.3	0.43		0.39	0.48	0.57
			ChR	Li		0.56	0.45		0.22	0.34	0.46		0.36	0.45	0.54
			ChR	ChL		0.39	0.56		0.35	0.46	0.57		0.43	0.51	0.6
			Li	ChL		0.16	0.75		0.17	0.3	0.43		0.46	0.55	0.63
	Inter-organs landmark pairs Euclidean distances (56 pairs)	Eyes-Nose (9 landmarks, 20 pairs)	ExR	N		0.57	0.37		0.18	0.31	0.44		0.28	0.38	0.48
			ExR	Prn		0.62	0.46		0.31	0.43	0.54		0.33	0.43	0.52
			ExR	AlL		0.66	0.33		0.3	0.42	0.54		0.4	0.48	0.57
			ExR	Sn		0.62	0.55		0.33	0.46	0.58		0.39	0.48	0.58
			ExR	AlR		0.72	0.53		0.1	0.25	0.4		0.37	0.47	0.56
			EnR	N		0.55	0.56		0.28	0.4	0.52		0.21	0.32	0.42
			EnR	Prn		0.61	0.55		0.26	0.38	0.5		0.53	0.6	0.68
			EnR	AlL		0.53	0.39		0.26	0.38	0.51		0.4	0.48	0.57
			EnR	Sn		0.63	0.56		0.51	0.62	0.72		0.51	0.59	0.67
			EnR	AlR		0.6	0.35		0.27	0.4	0.52		0.44	0.52	0.61
			N	EnL		0.73	0.3		0.35	0.46	0.58		0.21	0.32	0.42
			Prn	EnL		0.65	0.35		0.22	0.34	0.46		0.5	0.57	0.65
			EnL	AlL		0.64	0.62		0.3	0.42	0.55		0.47	0.56	0.65
			EnL	Sn		0.58	0.58		0.35	0.47	0.6		0.5	0.58	0.66
			EnL	AlR		0.63	0.36		0.27	0.39	0.52		0.37	0.46	0.55
			N	ExL		0.42	0.38		0.2	0.33	0.46		0.26	0.36	0.47
			Prn	ExL		0.5	0.24		0.21	0.32	0.44		0.31	0.41	0.5
			ExL	AlL		0.5	0.63		0.21	0.34	0.46		0.36	0.46	0.56
			ExL	Sn		0.43	0.56		0.14	0.26	0.39		0.35	0.45	0.55
			ExL	AlR		0.76	0.47		0.18	0.32	0.45		0.39	0.48	0.57
		Eyes-Mouth (8 landmarks, 16 pairs)	ExR	Ls		0.54	0.77		0	0.14	0.29		0.42	0.51	0.61
			ExR	ChR		0.51	0.78		0	0.1	0.24		0.39	0.48	0.58
			ExR	Li		0.36	0.29		0	0.1	0.26		0.36	0.45	0.54
			ExR	ChL		0.12	0.64		0.2	0.33	0.46		0.4	0.48	0.57
			EnR	Ls		0.79	0.73		0.26	0.38	0.51		0.54	0.62	0.7
			EnR	ChR		0.42	0.75		0.05	0.19	0.32		0.4	0.49	0.59
			EnR	Li		0.6	0.5		0.11	0.25	0.39		0.42	0.51	0.6
			EnR	ChL		0.24	0.88		0.23	0.35	0.47		0.36	0.45	0.55
			EnL	Ls		0.66	0.77		0.29	0.41	0.54		0.52	0.6	0.69
			EnL	ChR		0.45	0.49		0.33	0.45	0.58		0.19	0.3	0.42
			EnL	Li		0.49	0.57		0.22	0.35	0.47		0.43	0.52	0.61
			EnL	ChL		0.42	0.82		0.17	0.31	0.44		0.38	0.48	0.57
			ExL	Ls		0.54	0.66		0.04	0.18	0.32		0.4	0.5	0.59
			ExL	ChR		0.28	0.41		0.28	0.41	0.53		0.28	0.38	0.48
			ExL	Li		0.42	0.57		0.08	0.22	0.36		0.42	0.51	0.6
			ExL	ChL		0.45	0.85		0.2	0.33	0.46		0.33	0.43	0.54
		Nose-Mouth (9 landmarks, 20 pairs)	N	Ls		0.75	0.83		0.29	0.42	0.55		0.38	0.48	0.58
			N	ChR		0.65	0.6		0.3	0.42	0.55		0.46	0.54	0.62
			N	Li		0.67	0.56		0.23	0.37	0.5		0.37	0.46	0.55
			N	ChL		0.63	0.77		0.15	0.28	0.41		0.36	0.45	0.55
			Prn	Ls		0.68	0.84		0.16	0.28	0.41		0.52	0.6	0.67
			Prn	ChR		0.46	0.31		0.19	0.32	0.45		0.4	0.48	0.57
			Prn	Li		0.56	0.7		0.22	0.34	0.47		0.51	0.59	0.66
			Prn	ChL		0.62	0.81		0.18	0.31	0.45		0.48	0.56	0.65
			AlL	Ls		0.47	0.38		0.34	0.46	0.58		0.24	0.34	0.45
			AlL	ChR		0.55	0.37		0.19	0.32	0.44		0.33	0.42	0.51
			AlL	Li		0.58	0.4		0.31	0.43	0.55		0.3	0.39	0.49
			AlL	ChL		0.56	0.72		0.28	0.41	0.53		0.47	0.55	0.63
			Sn	Ls		0.5	0.91		0.25	0.37	0.49		0.49	0.57	0.66
			Sn	ChR		0.34	0.41		0.19	0.31	0.43		0.28	0.38	0.48
			Sn	Li		0.43	0.61		0.18	0.3	0.43		0.45	0.53	0.61
			Sn	ChL		0.32	0.72		0.07	0.2	0.33		0.4	0.49	0.59
			AlR	Ls		0.56	0.33		0.23	0.36	0.48		0.21	0.31	0.41
			AlR	ChR		0.47	0.63		0.26	0.39	0.51		0.46	0.53	0.61
			AlR	Li		0.46	0.4		0.3	0.42	0.54		0.3	0.39	0.49
			AlR	ChL		0.28	0.7		0.12	0.26	0.4		0.42	0.5	0.59

## Sheet: TS7
	Table S7. 494 SNPs associated (P<5e-8) with facial shape phenotypes in meta-analysis of GWAS
	MetaP column : colored with < 1.2E-9
	P column of 4 cohorts : colored with <1E-5, bolded with < 5E-8
	Eafreq column : bar chart ranged from 0 to 1
											RS (N=3,193)					TwinsUK (N=1,020)					ALSPAC (N=3,707)					Pittsburgh sample (N=2,195)
	SNP	CHR	BPhg37	EA	OA	Nearby Gene	MetaBeta	MetaP	Traits		EAfreq	BETA	SE	P		EAfreq	BETA	SE	P		EAfreq	BETA	SE	P		EAfreq	BETA	SE	P
	rs116460699	1	10725193	A	G	CASZ1/PEX14	-0.2897	8.519e-09	Prn-AlL		0.03023	-0.338311	0.0691649	1.054e-06		0.02985	-0.225313	0.12823	0.07918		NA	NA	NA	NA		0.02863	-0.23982	0.0893912	0.007341
	rs143353512	1	10733079	A	G	CASZ1/PEX14	-0.2871	6.437e-09	Prn-AlL		0.03079	-0.299198	0.068221	1.192e-05		0.03324	-0.197512	0.124155	0.112		NA	NA	NA	NA		0.02967	-0.311998	0.0880184	0.0004025
	rs7545505	1	10747151	T	C	CASZ1/PEX14	-0.2672	3.394e-08	Prn-AlL		0.03188	-0.28572	0.067617	2.443e-05		0.03387	-0.210563	0.124446	0.09097		NA	NA	NA	NA		0.03312	-0.264583	0.0835303	0.001557
	rs116229779	1	10748723	C	A	CASZ1/PEX14	-0.27	2.611e-08	Prn-AlL		0.03197	-0.28572	0.067617	2.443e-05		0.03407	-0.210563	0.124446	0.09097		NA	NA	NA	NA		0.03265	-0.272926	0.0840583	0.001187
	rs200243292	1	16528472	TACCCTAGGGACC	T	ARHGEF19	-0.1097	1.456e-08	EnR-ChL		0.2545	-0.122518	0.0285014	1.773e-05		NA	NA	NA	NA		0.2646	-0.0986661	0.0263602	0.0001847		NA	NA	NA	NA
	rs3118410	1	68885434	G	A	RPE65/DEPDC1	-0.0771	3.683e-08	EnR-Sn		0.4048	-0.0871998	0.0242792	0.0003332		0.3886	-0.069239	0.0458847	0.1316		0.399	-0.0684957	0.0230083	0.002928		0.3863	-0.0799147	0.0310563	0.01013
	rs3118410	1	68885434	G	A	RPE65/DEPDC1	-0.0807	7.804e-09	EnL-Sn		0.4048	-0.09618	0.0243073	7.777e-05		0.3886	-0.0877264	0.0460033	0.05674		0.399	-0.0719614	0.0228376	0.001639		0.3863	-0.0683708	0.0310972	0.02804
	rs3125890	1	68892089	T	C	RPE65/DEPDC1	-0.0804	4.432e-08	EnL-Sn		0.398	-0.0953269	0.0244097	9.619e-05		NA	NA	NA	NA		0.3991	-0.0725903	0.0228415	0.001497		0.3866	-0.0706738	0.0310255	0.02286
	rs3125895	1	68901735	A	C	RPE65/DEPDC1	-0.077	3.71e-08	EnR-Sn		0.405	-0.0871571	0.024292	0.0003378		0.3889	-0.0637461	0.0457449	0.1638		0.3989	-0.0680077	0.0230223	0.003154		0.3878	-0.0827969	0.0308542	0.007335
	rs3125895	1	68901735	A	C	RPE65/DEPDC1	-0.0803	8.825e-09	EnL-Sn		0.405	-0.0958388	0.0243244	8.296e-05		0.3889	-0.0793781	0.0458695	0.08392		0.3989	-0.0724106	0.0228425	0.001538		0.3878	-0.0700697	0.0308631	0.02325
	rs3125897	1	68901855	A	G	RPE65/DEPDC1	-0.0772	3.387e-08	EnR-Sn		0.4048	-0.0877983	0.0242834	0.0003033		0.3887	-0.0637461	0.0457449	0.1638		0.3989	-0.0680077	0.0230223	0.003154		0.3878	-0.0827969	0.0308542	0.007335
	rs3125897	1	68901855	A	G	RPE65/DEPDC1	-0.0802	9.126e-09	EnL-Sn		0.4048	-0.0955402	0.0243116	8.701e-05		0.3887	-0.0793781	0.0458695	0.08392		0.3989	-0.0724106	0.0228425	0.001538		0.3878	-0.0700697	0.0308631	0.02325
	rs3125899	1	68902237	C	T	RPE65/DEPDC1	-0.077	3.721e-08	EnR-Sn		0.405	-0.0871571	0.024292	0.0003378		0.3884	-0.0636979	0.045769	0.1643		0.3989	-0.0680077	0.0230223	0.003154		0.3878	-0.0827969	0.0308542	0.007335
	rs3125899	1	68902237	C	T	RPE65/DEPDC1	-0.0803	8.791e-09	EnL-Sn		0.405	-0.0958388	0.0243244	8.296e-05		0.3884	-0.0795164	0.0458926	0.08349		0.3989	-0.0724106	0.0228425	0.001538		0.3878	-0.0700697	0.0308631	0.02325
	rs3125902	1	68904266	C	T	RPE65/DEPDC1	-0.0771	3.509e-08	EnR-Sn		0.4049	-0.0871571	0.024292	0.0003378		0.3889	-0.0649507	0.0458124	0.1567		0.3989	-0.0680521	0.0230061	0.003121		0.3878	-0.0827969	0.0308542	0.007335
	rs3125902	1	68904266	C	T	RPE65/DEPDC1	-0.0804	8.571e-09	EnL-Sn		0.4049	-0.0958388	0.0243244	8.296e-05		0.3889	-0.0798393	0.0458603	0.08203		0.3989	-0.0724555	0.022835	0.00152		0.3878	-0.0700697	0.0308631	0.02325
	rs1925955	1	68905358	C	G	RPE65/DEPDC1	-0.077	3.647e-08	EnR-Sn		0.4049	-0.0871571	0.024292	0.0003378		0.3888	-0.0638907	0.0457738	0.1631		0.3989	-0.0680521	0.0230061	0.003121		0.3878	-0.0827969	0.0308542	0.007335
	rs1925955	1	68905358	C	G	RPE65/DEPDC1	-0.0802	9.113e-09	EnL-Sn		0.4049	-0.0958388	0.0243244	8.296e-05		0.3888	-0.078225	0.045828	0.08808		0.3989	-0.0724555	0.022835	0.00152		0.3878	-0.0700697	0.0308631	0.02325
	rs77142479	1	68907527	C	A	RPE65/DEPDC1	-0.0775	2.974e-08	EnR-Sn		0.4049	-0.0871571	0.024292	0.0003378		0.3888	-0.0638907	0.0457738	0.1631		0.3989	-0.0680521	0.0230061	0.003121		0.3874	-0.0852674	0.0308654	0.005787
	rs77142479	1	68907527	C	A	RPE65/DEPDC1	-0.0806	7.65e-09	EnL-Sn		0.4049	-0.0958388	0.0243244	8.296e-05		0.3888	-0.078225	0.045828	0.08808		0.3989	-0.0724555	0.022835	0.00152		0.3874	-0.0721084	0.0308745	0.01959
	rs1229119	1	119023640	T	C	TBX15	0.0788	2.252e-08	ExR-ChR		0.405	0.0481739	0.0250136	0.05413		0.394	0.134525	0.0451701	0.002973		0.4043	0.0988103	0.0229898	1.768e-05		0.3786	0.0633913	0.0307788	0.03966
	rs1146311	1	119027515	G	T	TBX15	0.0764	4.07e-08	ExR-ChR		0.485	0.0420068	0.0247488	0.0898		0.4821	0.111933	0.0446604	0.01237		0.4879	0.106007	0.0226656	3.01e-06		0.4689	0.0583978	0.0303556	0.05454
	rs1146308	1	119031724	C	T	TBX15	0.0767	3.497e-08	ExR-ChR		0.4856	0.042362	0.0247456	0.08692		0.4819	0.115657	0.0446408	0.009722		0.4878	0.104594	0.0226639	4.061e-06		0.4707	0.0604009	0.0303556	0.04674
	rs10923576	1	119042892	T	A	TBX15	0.0769	3.29e-08	ExR-ChR		0.4842	0.0441701	0.0247779	0.0747		0.4796	0.112668	0.0446801	0.01184		0.4896	0.106228	0.0226885	2.95e-06		0.4688	0.0571847	0.0303556	0.05966
	rs10754378	1	119043914	C	A	TBX15	0.0771	3.072e-08	ExR-ChR		0.4847	0.0427172	0.0247714	0.08478		0.482	0.115854	0.0445771	0.009495		0.4898	0.106978	0.0226889	2.507e-06		0.4688	0.0571847	0.0303556	0.05966
	rs10923577	1	119045267	A	G	TBX15	0.0775	2.522e-08	ExR-ChR		0.4847	0.0427495	0.0247844	0.08457		0.4825	0.11948	0.0442488	0.00705		0.4898	0.106978	0.0226889	2.507e-06		0.4688	0.0571847	0.0303556	0.05966
	rs10923578	1	119047161	G	A	TBX15	0.0773	2.723e-08	ExR-ChR		0.4846	0.0428463	0.0247682	0.08376		0.4825	0.11948	0.0442488	0.00705		0.4898	0.106978	0.0226937	2.514e-06		0.4686	0.0561973	0.0303556	0.06418
	rs1951938	1	119049738	C	T	TBX15	0.0773	2.737e-08	ExR-ChR		0.4846	0.0428463	0.0247682	0.08376		0.4828	0.119431	0.0442684	0.007096		0.4898	0.106978	0.0226937	2.514e-06		0.4686	0.0561973	0.0303556	0.06418
	rs10202675	2	78108917	T	C	LRRTM4	-0.258	4.43e-08	EnR-AlR		0.0478	-0.227368	0.059726	0.0001426		NA	NA	NA	NA		NA	NA	NA	NA		0.04121	-0.308594	0.0767732	6.033e-05
	rs2884836	2	176533433	T	C	KIAA1715	-0.0859	3.035e-08	ExR-ChR		0.3474	-0.0895027	0.0259887	0.0005799		NA	NA	NA	NA		0.3234	-0.100356	0.0242288	3.522e-05		0.351	-0.0551253	0.0319919	0.08485
	rs10208440	2	222988593	C	T	PAX3	0.1264	1.711e-11	EnR-N		0.1675	0.0718987	0.034057	0.03489		0.1758	0.0774885	0.0598216	0.1956		0.1703	0.187021	0.0305739	1.05e-09		0.17	0.119794	0.0401275	0.002861
	rs10208440	2	222988593	C	T	PAX3	0.1244	3.667e-11	N-EnL		0.1675	0.0480914	0.0341425	0.1592		0.1758	0.10528	0.0598922	0.07911		0.1703	0.18304	0.0306087	2.44e-09		0.17	0.137313	0.0399367	0.000596
	rs10208440	2	222988593	C	T	PAX3	0.1042	1.695e-08	AlL-Sn		0.1675	0.0851953	0.0318543	0.007501		0.1758	0.133931	0.0601321	0.0261		0.1703	0.127846	0.0310382	3.888e-05		0.17	0.0818062	0.0397575	0.03976
	rs13002885	2	222988687	T	C	PAX3	-0.0898	2.449e-10	EnR-N		0.4539	-0.0724258	0.0250697	0.003878		0.4369	-0.0532635	0.0472646	0.26		0.448	-0.130994	0.0231398	1.62e-08		0.4426	-0.0587948	0.030656	0.05527
	rs10196607	2	222989223	G	C	PAX3	0.1241	3.651e-11	EnR-N		0.1673	0.0755885	0.0341097	0.0268		0.1737	0.075364	0.0599334	0.2087		0.1706	0.183882	0.0305046	1.826e-09		0.1693	0.110011	0.0398702	0.005845
	rs10196607	2	222989223	G	C	PAX3	0.1213	1.04e-10	N-EnL		0.1673	0.0500894	0.0341936	0.1432		0.1737	0.100891	0.0599992	0.09294		0.1706	0.181294	0.0305415	3.187e-09		0.1693	0.125055	0.0398334	0.001712
	rs10196607	2	222989223	G	C	PAX3	0.1057	1.002e-08	AlL-Sn		0.1673	0.0865526	0.031896	0.006682		0.1737	0.135178	0.0603698	0.02532		0.1706	0.12747	0.0309694	3.942e-05		0.1693	0.0870935	0.039618	0.02808
	rs11688984	2	222989421	A	G	PAX3	-0.0913	1.1e-10	EnR-N		0.4534	-0.0743235	0.0250802	0.003073		0.4356	-0.0517876	0.0472255	0.2731		0.4482	-0.132644	0.0230124	8.877e-09		0.4436	-0.060035	0.0305549	0.04954
	rs13420189	2	222989909	C	G	PAX3	0.1248	2.706e-11	EnR-N		0.1675	0.0718987	0.034057	0.03489		0.1758	0.0774885	0.0598216	0.1956		0.1709	0.185531	0.0304949	1.288e-09		0.1699	0.114742	0.0398335	0.004005
	rs13420189	2	222989909	C	G	PAX3	0.1228	5.872e-11	N-EnL		0.1675	0.0480914	0.0341425	0.1592		0.1758	0.10528	0.0598922	0.07911		0.1709	0.184098	0.0305303	1.804e-09		0.1699	0.128018	0.039793	0.001316
	rs13420189	2	222989909	C	G	PAX3	0.1057	9.846e-09	AlL-Sn		0.1675	0.0851953	0.0318543	0.007501		0.1758	0.133931	0.0601321	0.0261		0.1709	0.13063	0.0309551	2.498e-05		0.1699	0.0842295	0.0395886	0.03351
	rs16863422	2	222990015	G	A	PAX3	0.1248	2.706e-11	EnR-N		0.1675	0.0718987	0.034057	0.03489		0.1758	0.0774885	0.0598216	0.1956		0.1709	0.185531	0.0304949	1.288e-09		0.1699	0.114742	0.0398335	0.004005
	rs16863422	2	222990015	G	A	PAX3	0.1228	5.872e-11	N-EnL		0.1675	0.0480914	0.0341425	0.1592		0.1758	0.10528	0.0598922	0.07911		0.1709	0.184098	0.0305303	1.804e-09		0.1699	0.128018	0.039793	0.001316
	rs16863422	2	222990015	G	A	PAX3	0.1057	9.846e-09	AlL-Sn		0.1675	0.0851953	0.0318543	0.007501		0.1758	0.133931	0.0601321	0.0261		0.1709	0.13063	0.0309551	2.498e-05		0.1699	0.0842295	0.0395886	0.03351
	rs55704383	2	222990622	C	G	PAX3	-0.0915	9.389e-11	EnR-N		0.454	-0.0743235	0.0250591	0.003044		0.4375	-0.0540686	0.0470074	0.2503		0.4483	-0.132857	0.0230055	8.32e-09		0.4436	-0.0600809	0.0305503	0.04928
	rs140643163	2	222990712	T	TAA	PAX3	0.1331	1.939e-10	EnR-N		0.1251	0.10284	0.0382054	0.007142		0.1315	0.0608838	0.0652446	0.351		0.1305	0.192501	0.0337248	1.235e-08		0.1257	0.103442	0.0453087	0.02252
	rs140643163	2	222990712	T	TAA	PAX3	0.1285	8.211e-10	N-EnL		0.1251	0.0743441	0.0382733	0.0522		0.1315	0.0856902	0.065298	0.1898		0.1305	0.190393	0.0337637	1.84e-08		0.1257	0.113739	0.0452622	0.01209
	rs140643163	2	222990712	T	TAA	PAX3	0.134	7.178e-11	AlL-Sn		0.1251	0.106651	0.0357121	0.00285		0.1315	0.0728478	0.0658363	0.2686		0.1305	0.173823	0.0341767	3.842e-07		0.1257	0.136882	0.0449567	0.00236
	rs140643163	2	222990712	T	TAA	PAX3	0.1164	1.42e-08	Sn-AlR		0.1251	0.0785722	0.0356368	0.02759		0.1315	0.0355288	0.0655815	0.5881		0.1305	0.138126	0.0342234	5.539e-05		0.1257	0.176909	0.0448051	8.128e-05
	rs78718024	2	222990788	G	A	PAX3	0.1331	1.939e-10	EnR-N		0.1251	0.10284	0.0382054	0.007142		0.1314	0.0608838	0.0652446	0.351		0.1305	0.192501	0.0337248	1.235e-08		0.1257	0.103442	0.0453087	0.02252
	rs78718024	2	222990788	G	A	PAX3	0.1285	8.211e-10	N-EnL		0.1251	0.0743441	0.0382733	0.0522		0.1314	0.0856902	0.065298	0.1898		0.1305	0.190393	0.0337637	1.84e-08		0.1257	0.113739	0.0452622	0.01209
	rs78718024	2	222990788	G	A	PAX3	0.134	7.178e-11	AlL-Sn		0.1251	0.106651	0.0357121	0.00285		0.1314	0.0728478	0.0658363	0.2686		0.1305	0.173823	0.0341767	3.842e-07		0.1257	0.136882	0.0449567	0.00236
	rs78718024	2	222990788	G	A	PAX3	0.1164	1.42e-08	Sn-AlR		0.1251	0.0785722	0.0356368	0.02759		0.1314	0.0355288	0.0655815	0.5881		0.1305	0.138126	0.0342234	5.539e-05		0.1257	0.176909	0.0448051	8.128e-05
	rs11886961	2	222991918	G	C	PAX3	0.1358	7.644e-11	EnR-N		0.1254	0.09836	0.0381791	0.01004		0.1326	0.066866	0.0651328	0.3051		0.1311	0.196598	0.033641	5.523e-09		0.1269	0.111894	0.0451893	0.01337
	rs11886961	2	222991918	G	C	PAX3	0.1324	2.34e-10	N-EnL		0.1254	0.0718815	0.0382454	0.0602		0.1326	0.0935046	0.065298	0.1525		0.1311	0.19653	0.0336812	5.843e-09		0.1269	0.12025	0.0451724	0.007798
	rs11886961	2	222991918	G	C	PAX3	0.1334	8.058e-11	AlL-Sn		0.1254	0.105137	0.0357016	0.003247		0.1326	0.0696986	0.0656581	0.2885		0.1311	0.173973	0.0341057	3.55e-07		0.1269	0.137617	0.0448465	0.002173
	rs11886961	2	222991918	G	C	PAX3	0.1164	1.345e-08	Sn-AlR		0.1254	0.0781998	0.0356261	0.0282		0.1326	0.0366991	0.0654711	0.5751		0.1311	0.136711	0.0341351	6.337e-05		0.1269	0.178997	0.0446932	6.416e-05
	rs13390924	2	222992442	G	C	PAX3	0.1248	2.857e-11	EnR-N		0.1673	0.0755885	0.0341097	0.0268		0.1739	0.075364	0.0599334	0.2087		0.1706	0.183882	0.0305046	1.826e-09		0.1693	0.113088	0.0398748	0.004618
	rs13390924	2	222992442	G	C	PAX3	0.122	8.368e-11	N-EnL		0.1673	0.0500894	0.0341936	0.1432		0.1739	0.100891	0.0599992	0.09294		0.1706	0.181294	0.0305415	3.187e-09		0.1693	0.127839	0.0398379	0.00135
	rs13390924	2	222992442	G	C	PAX3	0.1055	1.076e-08	AlL-Sn		0.1673	0.0865526	0.031896	0.006682		0.1739	0.135178	0.0603698	0.02532		0.1706	0.12747	0.0309694	3.942e-05		0.1693	0.0860654	0.0396253	0.03
	rs12694574	2	222993733	C	T	PAX3	0.1247	2.958e-11	EnR-N		0.1673	0.0766955	0.034115	0.02468		0.1739	0.075364	0.0599334	0.2087		0.1706	0.183882	0.0305046	1.826e-09		0.169	0.111159	0.0398794	0.005369
	rs12694574	2	222993733	C	T	PAX3	0.1215	9.916e-11	N-EnL		0.1673	0.049857	0.0342029	0.1451		0.1739	0.100891	0.0599992	0.09294		0.1706	0.181294	0.0305415	3.187e-09		0.169	0.125998	0.0398424	0.001584
	rs12694574	2	222993733	C	T	PAX3	0.1061	8.849e-09	AlL-Sn		0.1673	0.0865004	0.0319012	0.006723		0.1739	0.135178	0.0603698	0.02532		0.1706	0.12747	0.0309694	3.942e-05		0.169	0.0890028	0.0396327	0.02482
	rs17399261	2	222994084	A	G	PAX3	-0.0916	8.977e-11	EnR-N		0.4545	-0.0737963	0.0250433	0.003242		0.4374	-0.0540686	0.0470074	0.2503		0.4484	-0.13291	0.0230027	8.171e-09		0.4441	-0.0610915	0.0305136	0.04541
	rs6749789	2	222994221	A	G	PAX3	0.1363	6.69e-11	EnR-N		0.1253	0.0997832	0.0381949	0.009034		0.1327	0.066866	0.0651328	0.3051		0.1311	0.196598	0.033641	5.523e-09		0.1269	0.111894	0.0451893	0.01337
	rs6749789	2	222994221	A	G	PAX3	0.1324	2.391e-10	N-EnL		0.1253	0.0716491	0.0382593	0.06125		0.1327	0.0935046	0.065298	0.1525		0.1311	0.19653	0.0336812	5.843e-09		0.1269	0.12025	0.0451724	0.007798
	rs6749789	2	222994221	A	G	PAX3	0.1334	8.077e-11	AlL-Sn		0.1253	0.105137	0.0357121	0.003266		0.1327	0.0696986	0.0656581	0.2885		0.1311	0.173973	0.0341057	3.55e-07		0.1269	0.137617	0.0448465	0.002173
	rs6749789	2	222994221	A	G	PAX3	0.1161	1.489e-08	Sn-AlR		0.1253	0.0771359	0.0356368	0.03054		0.1327	0.0366991	0.0654711	0.5751		0.1311	0.136711	0.0341351	6.337e-05		0.1269	0.178997	0.0446932	6.416e-05
	rs13401386	2	222994984	A	G	PAX3	0.1358	8.104e-11	EnR-N		0.1252	0.104264	0.0382212	0.006399		0.1319	0.062561	0.0651887	0.3375		0.1308	0.194736	0.033668	7.903e-09		0.1264	0.10877	0.0452444	0.0163
	rs13401386	2	222994984	A	G	PAX3	0.1308	3.971e-10	N-EnL		0.1252	0.0740653	0.0382872	0.05313		0.1319	0.0874029	0.0652445	0.1808		0.1308	0.192774	0.0337017	1.149e-08		0.1264	0.119262	0.0452173	0.008394
	rs13401386	2	222994984	A	G	PAX3	0.1333	8.41e-11	AlL-Sn		0.1252	0.106599	0.0357277	0.002866		0.1319	0.0719565	0.0658363	0.2748		0.1308	0.171189	0.034081	5.34e-07		0.1264	0.138424	0.0448906	0.002067
	rs13401386	2	222994984	A	G	PAX3	0.1165	1.365e-08	Sn-AlR		0.1252	0.077455	0.0356527	0.02988		0.1319	0.0360643	0.0655815	0.5825		0.1308	0.136041	0.0341468	6.919e-05		0.1264	0.18168	0.0447305	5.048e-05
	rs2894450	2	222997104	G	A	PAX3	0.1038	4.3e-13	EnR-N		0.3945	0.111696	0.0258182	1.571e-05		0.3984	0.0574175	0.0469292	0.2214		0.3918	0.147435	0.0231162	2.016e-10		0.3894	0.0345465	0.0309637	0.2647
	rs2894450	2	222997104	G	A	PAX3	0.0873	1.242e-09	N-EnL		0.3945	0.0565015	0.0260158	0.02997		0.3984	0.0318247	0.0471698	0.5001		0.3918	0.145903	0.0231335	3.185e-10		0.3894	0.049977	0.0309382	0.1065
	rs59895745	2	222997597	AT	A	PAX3	-0.0915	9.505e-11	EnR-N		0.4542	-0.0735855	0.0250486	0.003329		0.4367	-0.0569143	0.0467559	0.2236		0.4482	-0.133655	0.0230082	6.816e-09		0.4443	-0.0584273	0.0305871	0.05622
	rs13426004	2	222998418	A	T	PAX3	0.1244	3.331e-11	EnR-N		0.1673	0.0766955	0.034115	0.02468		0.1755	0.0718418	0.0597097	0.2289		0.1707	0.183935	0.0305083	1.817e-09		0.169	0.111159	0.0398794	0.005369
	rs13426004	2	222998418	A	T	PAX3	0.1213	1.032e-10	N-EnL		0.1673	0.049857	0.0342029	0.1451		0.1755	0.101105	0.0597851	0.09117		0.1707	0.180871	0.0305422	3.467e-09		0.169	0.125998	0.0398424	0.001584
	rs13426004	2	222998418	A	T	PAX3	0.1055	1.071e-08	AlL-Sn		0.1673	0.0865004	0.0319012	0.006723		0.1755	0.124305	0.0603104	0.03945		0.1707	0.128448	0.0309365	3.366e-05		0.169	0.0890028	0.0396327	0.02482
	rs6724102	2	222998485	C	T	PAX3	0.1247	2.779e-11	EnR-N		0.1675	0.0718987	0.034057	0.03489		0.1776	0.0740222	0.0595979	0.2147		0.1709	0.185584	0.0304986	1.282e-09		0.1697	0.11589	0.0398427	0.003667
	rs6724102	2	222998485	C	T	PAX3	0.1229	5.693e-11	N-EnL		0.1675	0.0480914	0.0341425	0.1592		0.1776	0.10544	0.0597316	0.07763		0.1709	0.183622	0.0305222	1.965e-09		0.1697	0.128961	0.039802	0.001215
	rs6724102	2	222998485	C	T	PAX3	0.1054	1.036e-08	AlL-Sn		0.1675	0.0851953	0.0318543	0.007501		0.1776	0.123116	0.0600133	0.0405		0.1709	0.131609	0.0309158	2.124e-05		0.1697	0.0861388	0.039596	0.0297
	rs10932943	2	223001061	A	G	PAX3	0.1355	8.707e-11	EnR-N		0.1252	0.104264	0.0382212	0.006399		0.134	0.0601011	0.0649092	0.3545		0.1309	0.194736	0.0336564	7.794e-09		0.1264	0.10877	0.0452444	0.0163
	rs10932943	2	223001061	A	G	PAX3	0.1305	4.313e-10	N-EnL		0.1252	0.0740653	0.0382872	0.05313		0.134	0.0901326	0.0649768	0.1657		0.1309	0.191293	0.033702	1.483e-08		0.1264	0.119262	0.0452173	0.008394
	rs10932943	2	223001061	A	G	PAX3	0.1334	8.096e-11	AlL-Sn		0.1252	0.106599	0.0357277	0.002866		0.134	0.0638755	0.0655392	0.3302		0.1309	0.173823	0.034103	3.629e-07		0.1264	0.138424	0.0448906	0.002067
	rs10932943	2	223001061	A	G	PAX3	0.1161	1.489e-08	Sn-AlR		0.1252	0.077455	0.0356527	0.02988		0.134	0.0261167	0.0653607	0.6895		0.1309	0.137977	0.0341527	5.447e-05		0.1264	0.18168	0.0447305	5.048e-05
	rs13012148	2	223001878	A	T	PAX3	-0.0913	9.816e-11	EnR-N		0.4544	-0.0737963	0.0250433	0.003242		0.4378	-0.0566348	0.0466217	0.2248		0.4482	-0.13291	0.0229908	8.059e-09		0.4445	-0.0589326	0.0305687	0.05392
	rs12471618	2	223002513	A	G	PAX3	-0.0908	1.268e-10	EnR-N		0.4543	-0.0737963	0.0250433	0.003242		0.4374	-0.0538729	0.0467223	0.2492		0.4482	-0.133442	0.0229874	6.969e-09		0.4436	-0.05659	0.0305825	0.06445
	rs13385121	2	223002705	G	A	PAX3	0.1338	1.546e-10	EnR-N		0.1251	0.104264	0.0382212	0.006399		0.1343	0.0603247	0.0647974	0.3522		0.1306	0.192554	0.0337164	1.213e-08		0.1255	0.105188	0.0454236	0.02067
	rs13385121	2	223002705	G	A	PAX3	0.1283	8.943e-10	N-EnL		0.1251	0.0740653	0.0382872	0.05313		0.1343	0.0902932	0.0649233	0.1644		0.1306	0.188436	0.0337578	2.551e-08		0.1255	0.114188	0.0453969	0.01197
	rs13385121	2	223002705	G	A	PAX3	0.1342	6.763e-11	AlL-Sn		0.1251	0.106599	0.0357277	0.002866		0.1343	0.0626277	0.0654204	0.3388		0.1306	0.17751	0.0341628	2.146e-07		0.1255	0.136515	0.0450742	0.002488
	rs13385121	2	223002705	G	A	PAX3	0.1152	2.019e-08	Sn-AlR		0.1251	0.077455	0.0356527	0.02988		0.1343	0.0220151	0.0652503	0.7359		0.1306	0.140881	0.0342193	3.915e-05		0.1255	0.17512	0.0449244	9.986e-05
	rs34187558	2	223002775	T	C	PAX3	-0.0906	1.362e-10	EnR-N		0.4543	-0.0737963	0.0250433	0.003242		0.4373	-0.0542978	0.0467111	0.2454		0.4481	-0.132857	0.0229776	8.013e-09		0.4436	-0.05659	0.0305825	0.06445
	rs974448	2	223005314	G	A	PAX3	0.1256	1.972e-11	EnR-N		0.1673	0.0766955	0.034115	0.02468		0.1764	0.0817375	0.0592066	0.1677		0.1708	0.183988	0.030507	1.788e-09		0.1695	0.112813	0.0397967	0.004636
	rs974448	2	223005314	G	A	PAX3	0.1208	1.177e-10	N-EnL		0.1673	0.049857	0.0342029	0.1451		0.1764	0.0975188	0.0593034	0.1004		0.1708	0.18013	0.0305357	3.989e-09		0.1695	0.126537	0.0397616	0.001478
	rs974448	2	223005314	G	A	PAX3	0.1052	1.151e-08	AlL-Sn		0.1673	0.0865004	0.0319012	0.006723		0.1764	0.119492	0.0600727	0.04704		0.1708	0.131684	0.030919	2.109e-05		0.1695	0.0842295	0.0395519	0.03326
	rs35204747	2	223006198	A	G	PAX3	-0.0914	9.263e-11	EnR-N		0.4544	-0.0737963	0.0250433	0.003242		0.4375	-0.0593184	0.0465266	0.2026		0.4481	-0.132857	0.0229776	8.013e-09		0.4445	-0.0582436	0.0305595	0.05686
	rs10172888	2	223007632	C	T	PAX3	0.1249	2.508e-11	EnR-N		0.1675	0.0703174	0.0340517	0.03897		0.1784	0.0835265	0.0590947	0.1579		0.1713	0.184946	0.0304939	1.45e-09		0.1697	0.11612	0.039907	0.003655
	rs10172888	2	223007632	C	T	PAX3	0.1211	1.041e-10	N-EnL		0.1675	0.0462467	0.0341379	0.1756		0.1784	0.101587	0.0591964	0.0864		0.1713	0.181876	0.0305212	2.779e-09		0.1697	0.128378	0.0398694	0.001301
	rs10172888	2	223007632	C	T	PAX3	0.1054	1.029e-08	AlL-Sn		0.1675	0.0857173	0.0318438	0.007138		0.1784	0.117115	0.059835	0.05057		0.1713	0.134092	0.0308967	1.466e-05		0.1697	0.0837155	0.0396621	0.03494
	rs2395846	2	223008622	C	G	PAX3	0.1249	2.508e-11	EnR-N		0.1675	0.0703174	0.0340517	0.03897		0.1784	0.0835265	0.0590947	0.1579		0.1713	0.184946	0.0304939	1.45e-09		0.1697	0.11612	0.039907	0.003655
	rs2395846	2	223008622	C	G	PAX3	0.1211	1.041e-10	N-EnL		0.1675	0.0462467	0.0341379	0.1756		0.1784	0.101587	0.0591964	0.0864		0.1713	0.181876	0.0305212	2.779e-09		0.1697	0.128378	0.0398694	0.001301
	rs2395846	2	223008622	C	G	PAX3	0.1054	1.029e-08	AlL-Sn		0.1675	0.0857173	0.0318438	0.007138		0.1784	0.117115	0.059835	0.05057		0.1713	0.134092	0.0308967	1.466e-05		0.1697	0.0837155	0.0396621	0.03494
	rs1370918	2	223008640	A	G	PAX3	-0.0914	9.263e-11	EnR-N		0.4543	-0.0737963	0.0250433	0.003242		0.4375	-0.0593184	0.0465266	0.2026		0.4481	-0.132857	0.0229776	8.013e-09		0.4445	-0.0582436	0.0305595	0.05686
	rs1992222	2	223009416	A	T	PAX3	0.1249	2.508e-11	EnR-N		0.1675	0.0703174	0.0340517	0.03897		0.1784	0.0835265	0.0590947	0.1579		0.1713	0.184946	0.0304939	1.45e-09		0.1697	0.11612	0.039907	0.003655
	rs1992222	2	223009416	A	T	PAX3	0.1211	1.041e-10	N-EnL		0.1675	0.0462467	0.0341379	0.1756		0.1784	0.101587	0.0591964	0.0864		0.1713	0.181876	0.0305212	2.779e-09		0.1697	0.128378	0.0398694	0.001301
	rs1992222	2	223009416	A	T	PAX3	0.1054	1.029e-08	AlL-Sn		0.1675	0.0857173	0.0318438	0.007138		0.1784	0.117115	0.059835	0.05057		0.1713	0.134092	0.0308967	1.466e-05		0.1697	0.0837155	0.0396621	0.03494
	rs12471410	2	223009419	C	A	PAX3	-0.0914	9.263e-11	EnR-N		0.4543	-0.0737963	0.0250433	0.003242		0.4375	-0.0593184	0.0465266	0.2026		0.4481	-0.132857	0.0229776	8.013e-09		0.4445	-0.0582436	0.0305595	0.05686
	rs60309759	2	223009633	C	T	PAX3	0.1253	2.286e-11	EnR-N		0.1673	0.0766955	0.034115	0.02468		0.1764	0.0817375	0.0592066	0.1677		0.1708	0.183988	0.030507	1.788e-09		0.169	0.111343	0.0399437	0.005355
	rs60309759	2	223009633	C	T	PAX3	0.1205	1.333e-10	N-EnL		0.1673	0.049857	0.0342029	0.1451		0.1764	0.0975188	0.0593034	0.1004		0.1708	0.18013	0.0305357	3.989e-09		0.169	0.125414	0.0399053	0.001694
	rs60309759	2	223009633	C	T	PAX3	0.1057	9.949e-09	AlL-Sn		0.1673	0.0865004	0.0319012	0.006723		0.1764	0.119492	0.0600727	0.04704		0.1708	0.131684	0.030919	2.109e-05		0.169	0.0865795	0.0396988	0.02931
	rs10932945	2	223009759	T	A	PAX3	-0.0914	9.263e-11	EnR-N		0.4543	-0.0737963	0.0250433	0.003242		0.4375	-0.0593184	0.0465266	0.2026		0.4481	-0.132857	0.0229776	8.013e-09		0.4445	-0.0582436	0.0305595	0.05686
	rs72958777	2	223014358	G	A	PAX3	-0.0929	3.855e-10	EnR-N		0.4551	-0.0716879	0.0250539	0.004248		NA	NA	NA	NA		0.4469	-0.130728	0.0230399	1.503e-08		0.4437	-0.0576465	0.0306376	0.06002
	rs11686586	2	223020651	G	A	PAX3	-0.091	1.16e-10	EnR-N		0.4543	-0.0737963	0.0250433	0.003242		0.4374	-0.057697	0.0466105	0.2161		0.4481	-0.132803	0.0229764	8.067e-09		0.4463	-0.0568656	0.0306652	0.06378
	rs144142342	2	223020917	C	G	PAX3	0.1371	4.494e-11	EnR-N		0.1283	0.109798	0.0379155	0.003799		0.1364	0.0651328	0.0640147	0.3093		0.1309	0.194736	0.0336564	7.794e-09		0.126	0.107622	0.0453822	0.0178
	rs144142342	2	223020917	C	G	PAX3	0.1281	7.894e-10	N-EnL		0.1283	0.0742047	0.0380038	0.05095		0.1364	0.0749856	0.064174	0.2427		0.1309	0.191293	0.033702	1.483e-08		0.126	0.117062	0.045352	0.009917
	rs144142342	2	223020917	C	G	PAX3	0.1345	4.994e-11	AlL-Sn		0.1283	0.111088	0.0354406	0.001739		0.1364	0.0567512	0.0647074	0.3807		0.1309	0.173823	0.034103	3.629e-07		0.126	0.141215	0.0450228	0.001735
	rs144142342	2	223020917	C	G	PAX3	0.1171	1.021e-08	Sn-AlR		0.1283	0.0832535	0.0353708	0.01862		0.1364	0.0252665	0.0645878	0.6958		0.1309	0.137977	0.0341527	5.447e-05		0.126	0.179742	0.0448722	6.383e-05
	rs79548009	2	223020977	T	C	PAX3	-0.0915	8.07e-10	EnR-N		0.4488	-0.0657842	0.0253121	0.009392		NA	NA	NA	NA		0.4461	-0.132378	0.0230623	1.022e-08		0.4439	-0.0570493	0.0305549	0.06201
	rs67055616	2	223022007	C	T	PAX3	-0.0909	1.222e-10	EnR-N		0.4542	-0.0737963	0.0250433	0.003242		0.4367	-0.0549184	0.0467111	0.24		0.4474	-0.133282	0.0230075	7.51e-09		0.4439	-0.0570493	0.0305549	0.06201
	rs7608778	2	223023579	C	T	PAX3	0.1371	5.294e-11	EnR-N		0.1253	0.104264	0.0382212	0.006399		0.1345	0.0755317	0.0647974	0.2437		0.131	0.195321	0.033647	6.972e-09		0.126	0.107622	0.0453822	0.0178
	rs7608778	2	223023579	C	T	PAX3	0.1305	4.361e-10	N-EnL		0.1253	0.0740653	0.0382872	0.05313		0.1345	0.0939863	0.0647092	0.1467		0.131	0.191504	0.0337037	1.434e-08		0.126	0.117062	0.045352	0.009917
	rs7608778	2	223023579	C	T	PAX3	0.1343	6.255e-11	AlL-Sn		0.1253	0.106599	0.0357277	0.002866		0.1345	0.0663711	0.0654204	0.3107		0.131	0.174048	0.0341138	3.533e-07		0.126	0.141215	0.0450228	0.001735
	rs7608778	2	223023579	C	T	PAX3	0.1159	1.639e-08	Sn-AlR		0.1253	0.077455	0.0356527	0.02988		0.1345	0.0275188	0.0653055	0.6736		0.131	0.138275	0.0341588	5.28e-05		0.126	0.179742	0.0448722	6.383e-05
	rs75574803	2	223024232	T	A	PAX3	0.1378	4.13e-11	EnR-N		0.1253	0.107585	0.0382318	0.004923		0.1345	0.07173	0.0645178	0.2661		0.131	0.195321	0.033647	6.972e-09		0.126	0.108449	0.0453731	0.01695
	rs75574803	2	223024232	T	A	PAX3	0.1307	4.117e-10	N-EnL		0.1253	0.0743441	0.0383012	0.05227		0.1345	0.0935046	0.0647627	0.1492		0.131	0.191504	0.0337037	1.434e-08		0.126	0.117825	0.045352	0.009439
	rs75574803	2	223024232	T	A	PAX3	0.134	6.913e-11	AlL-Sn		0.1253	0.10592	0.0357382	0.003057		0.1345	0.0672624	0.0654204	0.3043		0.131	0.174048	0.0341138	3.533e-07		0.126	0.140407	0.0450154	0.001834
	rs75574803	2	223024232	T	A	PAX3	0.1161	1.539e-08	Sn-AlR		0.1253	0.0778806	0.0356634	0.02902		0.1345	0.0281813	0.0653607	0.6663		0.131	0.138275	0.0341588	5.28e-05		0.126	0.179891	0.0448871	6.344e-05
	rs75999922	2	223024589	G	T	PAX3	0.1388	2.989e-11	EnR-N		0.1253	0.106214	0.038216	0.005478		0.1347	0.07173	0.0645178	0.2661		0.1313	0.198833	0.033632	3.679e-09		0.126	0.108449	0.0453731	0.01695
	rs75999922	2	223024589	G	T	PAX3	0.1308	3.964e-10	N-EnL		0.1253	0.0739724	0.0382872	0.05347		0.1347	0.0935046	0.0647627	0.1492		0.1313	0.19198	0.0336867	1.302e-08		0.126	0.117825	0.045352	0.009439
	rs75999922	2	223024589	G	T	PAX3	0.1347	5.409e-11	AlL-Sn		0.1253	0.103466	0.0357277	0.003799		0.1347	0.0672624	0.0654204	0.3043		0.1313	0.178187	0.0340898	1.821e-07		0.126	0.140407	0.0450154	0.001834
	rs75999922	2	223024589	G	T	PAX3	0.1163	1.444e-08	Sn-AlR		0.1253	0.0763379	0.0356527	0.03236		0.1347	0.0281813	0.0653607	0.6663		0.1313	0.140211	0.0341394	4.087e-05		0.126	0.179891	0.0448871	6.344e-05
	rs34460569	2	223026935	T	C	PAX3	0.0978	2.993e-09	ExR-N		0.2204	0.0727395	0.0299454	0.01521		0.2305	0.0921335	0.0503171	0.06739		0.2284	0.107255	0.0266803	5.924e-05		0.2216	0.120054	0.0362127	0.0009295
	rs34460569	2	223026935	T	C	PAX3	0.1393	4.26e-17	EnR-N		0.2204	0.152969	0.0301669	4.172e-07		0.2305	0.0821848	0.0509434	0.107		0.2284	0.180476	0.0266582	1.491e-11		0.2216	0.0713346	0.0364712	0.05057
	rs34460569	2	223026935	T	C	PAX3	0.1258	3.714e-14	N-EnL		0.2204	0.113561	0.0303231	0.0001835		0.2305	0.0613373	0.0515586	0.2343		0.2284	0.179284	0.026707	2.204e-11		0.2216	0.0763351	0.0364343	0.03633
	rs34460569	2	223026935	T	C	PAX3	0.0945	9.532e-09	N-ExL		0.2204	0.0951598	0.0295652	0.0013		0.2305	0.0471513	0.0507845	0.3532		0.2284	0.0932765	0.0268113	0.0005097		0.2216	0.119801	0.0361698	0.0009409
	rs34460569	2	223026935	T	C	PAX3	0.0891	4.881e-08	AlL-Sn		0.2204	0.0664544	0.0283828	0.01928		0.2305	-0.0298106	0.0514094	0.5622		0.2284	0.109862	0.0270997	5.134e-05		0.2216	0.147677	0.0361225	4.493e-05
	rs34460569	2	223026935	T	C	PAX3	0.0895	4.274e-08	Sn-AlR		0.2204	0.082562	0.0283328	0.003581		0.2305	0.0170192	0.0514826	0.741		0.2284	0.0737539	0.0271454	0.006613		0.2216	0.163714	0.0360155	5.781e-06
	rs34032897	2	223028582	G	A	PAX3	0.0967	4.461e-09	ExR-N		0.2229	0.06777	0.0298212	0.02315		0.2314	0.0934476	0.0502716	0.06339		0.2278	0.108177	0.0267566	5.38e-05		0.2216	0.120054	0.0362127	0.0009295
	rs34032897	2	223028582	G	A	PAX3	0.1407	1.955e-17	EnR-N		0.2229	0.152969	0.0300351	3.741e-07		0.2314	0.0786066	0.0509601	0.1231		0.2278	0.185371	0.026726	4.743e-12		0.2216	0.0713346	0.0364712	0.05057
	rs34032897	2	223028582	G	A	PAX3	0.127	2.17e-14	N-EnL		0.2229	0.114722	0.030193	0.0001475		0.2314	0.0569484	0.0516336	0.2702		0.2278	0.182775	0.0267724	1.01e-11		0.2216	0.0763351	0.0364343	0.03633
	rs34032897	2	223028582	G	A	PAX3	0.0939	1.173e-08	N-ExL		0.2229	0.0957228	0.0294376	0.001157		0.2314	0.0490677	0.0507446	0.3338		0.2278	0.090721	0.0269122	0.0007559		0.2216	0.119801	0.0361698	0.0009409
	rs34032897	2	223028582	G	A	PAX3	0.0897	3.914e-08	AlL-Sn		0.2229	0.0666632	0.0282575	0.01836		0.2314	-0.0328647	0.051451	0.5232		0.2278	0.112496	0.027186	3.578e-05		0.2216	0.147677	0.0361225	4.493e-05
	rs34032897	2	223028582	G	A	PAX3	0.0899	3.658e-08	Sn-AlR		0.2229	0.0802745	0.0282051	0.004465		0.2314	0.0185925	0.0515764	0.7186		0.2278	0.0764718	0.0272045	0.004968		0.2216	0.163714	0.0360155	5.781e-06
	rs76863222	2	223028791	G	T	PAX3	0.1389	2.816e-11	EnR-N		0.1255	0.107374	0.0381896	0.004957		0.1345	0.07173	0.0645178	0.2661		0.1313	0.198833	0.033632	3.679e-09		0.126	0.107622	0.0453822	0.0178
	rs76863222	2	223028791	G	T	PAX3	0.1304	4.453e-10	N-EnL		0.1255	0.073229	0.0382593	0.0557		0.1345	0.0935046	0.0647627	0.1492		0.1313	0.19198	0.0336867	1.302e-08		0.126	0.117062	0.045352	0.009917
	rs76863222	2	223028791	G	T	PAX3	0.1355	4.112e-11	AlL-Sn		0.1255	0.10545	0.0357016	0.003157		0.1345	0.0672624	0.0654204	0.3043		0.1313	0.178187	0.0340898	1.821e-07		0.126	0.141215	0.0450228	0.001735
	rs76863222	2	223028791	G	T	PAX3	0.1166	1.321e-08	Sn-AlR		0.1255	0.0772955	0.0356261	0.03012		0.1345	0.0281813	0.0653607	0.6663		0.1313	0.140211	0.0341394	4.087e-05		0.126	0.179742	0.0448722	6.383e-05
	rs1370926	2	223030502	G	C	PAX3	0.0966	4.786e-09	ExR-N		0.2225	0.0681708	0.0298252	0.02237		0.2316	0.0931949	0.050307	0.06418		0.2275	0.108001	0.0267794	5.62e-05		0.2217	0.119199	0.0362084	0.00101
	rs1370926	2	223030502	G	C	PAX3	0.1403	2.498e-17	EnR-N		0.2225	0.152653	0.0300404	3.963e-07		0.2316	0.0785507	0.0509713	0.1236		0.2275	0.185052	0.0267378	5.263e-12		0.2217	0.07037	0.0364666	0.05377
	rs1370926	2	223030502	G	C	PAX3	0.1272	2.015e-14	N-EnL		0.2225	0.11607	0.030193	0.0001236		0.2316	0.0580189	0.0515908	0.2612		0.2275	0.182775	0.0267921	1.044e-11		0.2217	0.0749431	0.0364478	0.03982
	rs1370926	2	223030502	G	C	PAX3	0.0939	1.188e-08	N-ExL		0.2225	0.0962484	0.0294413	0.001089		0.2316	0.0500658	0.0507845	0.3243		0.2275	0.0907636	0.0269248	0.0007561		0.2217	0.118392	0.0361819	0.001085
	rs1370926	2	223030502	G	C	PAX3	0.0898	3.705e-08	Sn-AlR		0.2225	0.0806469	0.0282104	0.004277		0.2316	0.0201658	0.0515875	0.696		0.2275	0.076025	0.0272004	0.005218		0.2217	0.162894	0.0360081	6.398e-06
	rs7607981	2	223032002	T	C	PAX3	0.1389	2.816e-11	EnR-N		0.1255	0.107374	0.0381896	0.004957		0.1344	0.07173	0.0645178	0.2661		0.1313	0.198833	0.033632	3.679e-09		0.126	0.107622	0.0453822	0.0178
	rs7607981	2	223032002	T	C	PAX3	0.1304	4.453e-10	N-EnL		0.1255	0.073229	0.0382593	0.0557		0.1344	0.0935046	0.0647627	0.1492		0.1313	0.19198	0.0336867	1.302e-08		0.126	0.117062	0.045352	0.009917
	rs7607981	2	223032002	T	C	PAX3	0.1355	4.112e-11	AlL-Sn		0.1255	0.10545	0.0357016	0.003157		0.1344	0.0672624	0.0654204	0.3043		0.1313	0.178187	0.0340898	1.821e-07		0.126	0.141215	0.0450228	0.001735
	rs7607981	2	223032002	T	C	PAX3	0.1166	1.321e-08	Sn-AlR		0.1255	0.0772955	0.0356261	0.03012		0.1344	0.0281813	0.0653607	0.6663		0.1313	0.140211	0.0341394	4.087e-05		0.126	0.179742	0.0448722	6.383e-05
	rs986429	2	223032399	A	T	PAX3	0.096	5.887e-09	ExR-N		0.2225	0.0681708	0.0298252	0.02237		0.2314	0.0942056	0.0503272	0.06154		0.2272	0.106332	0.0268042	7.422e-05		0.2217	0.119199	0.0362084	0.00101
	rs986429	2	223032399	A	T	PAX3	0.1402	2.729e-17	EnR-N		0.2225	0.152653	0.0300404	3.963e-07		0.2314	0.0770971	0.0509769	0.1307		0.2272	0.185371	0.02678	5.226e-12		0.2217	0.07037	0.0364666	0.05377
	rs986429	2	223032399	A	T	PAX3	0.1274	1.841e-14	N-EnL		0.2225	0.11607	0.030193	0.0001236		0.2314	0.058233	0.0516282	0.2595		0.2272	0.183516	0.0268259	9.149e-12		0.2217	0.0749431	0.0364478	0.03982
	rs986429	2	223032399	A	T	PAX3	0.0932	1.567e-08	N-ExL		0.2225	0.0962484	0.0294413	0.001089		0.2314	0.0491476	0.0508244	0.3335		0.2272	0.0890173	0.0269505	0.0009641		0.2217	0.118392	0.0361819	0.001085
	rs986429	2	223032399	A	T	PAX3	0.0901	3.39e-08	Sn-AlR		0.2225	0.0806469	0.0282104	0.004277		0.2314	0.0202762	0.0516261	0.6946		0.2272	0.0767696	0.0272329	0.004838		0.2217	0.162894	0.0360081	6.398e-06
	rs986430	2	223032642	T	G	PAX3	0.0959	6.253e-09	ExR-N		0.2225	0.0681708	0.0298252	0.02237		0.2314	0.0942056	0.0503272	0.06154		0.2273	0.106025	0.0268349	7.937e-05		0.2217	0.119199	0.0362084	0.00101
	rs986430	2	223032642	T	G	PAX3	0.1399	3.182e-17	EnR-N		0.2225	0.152653	0.0300404	3.963e-07		0.2314	0.0770971	0.0509769	0.1307		0.2273	0.184733	0.0267962	6.346e-12		0.2217	0.07037	0.0364666	0.05377
	rs986430	2	223032642	T	G	PAX3	0.127	2.299e-14	N-EnL		0.2225	0.11607	0.030193	0.0001236		0.2314	0.058233	0.0516282	0.2595		0.2273	0.182405	0.0268401	1.25e-11		0.2217	0.0749431	0.0364478	0.03982
	rs986430	2	223032642	T	G	PAX3	0.0934	1.453e-08	N-ExL		0.2225	0.0962484	0.0294413	0.001089		0.2314	0.0491476	0.0508244	0.3335		0.2273	0.0896988	0.0269852	0.0008961		0.2217	0.118392	0.0361819	0.001085
	rs986430	2	223032642	T	G	PAX3	0.0893	4.411e-08	Sn-AlR		0.2225	0.0806469	0.0282104	0.004277		0.2314	0.0202762	0.0516261	0.6946		0.2273	0.0746103	0.0272102	0.006134		0.2217	0.162894	0.0360081	6.398e-06
	rs11895863	2	223033396	G	C	PAX3	0.0957	6.753e-09	ExR-N		0.2226	0.0677299	0.0298212	0.02323		0.2314	0.0942056	0.0503272	0.06154		0.2271	0.105893	0.0268084	7.949e-05		0.2218	0.1189	0.0362212	0.001046
	rs11895863	2	223033396	G	C	PAX3	0.1401	2.921e-17	EnR-N		0.2226	0.152653	0.0300351	3.946e-07		0.2314	0.0770971	0.0509769	0.1307		0.2271	0.184999	0.0267765	5.742e-12		0.2218	0.0703241	0.0364803	0.05398
	rs11895863	2	223033396	G	C	PAX3	0.1277	1.624e-14	N-EnL		0.2226	0.117185	0.0301884	0.0001056		0.2314	0.058233	0.0516282	0.2595		0.2271	0.183304	0.0268263	9.719e-12		0.2218	0.074988	0.0364612	0.03986
	rs11895863	2	223033396	G	C	PAX3	0.0936	1.381e-08	N-ExL		0.2226	0.0972995	0.0294338	0.0009598		0.2314	0.0491476	0.0508244	0.3335		0.2271	0.0889748	0.026962	0.0009757		0.2218	0.118674	0.036194	0.001056
	rs11895863	2	223033396	G	C	PAX3	0.0901	3.43e-08	Sn-AlR		0.2226	0.0810725	0.0282051	0.004085		0.2314	0.0202762	0.0516261	0.6946		0.2271	0.0765462	0.027231	0.004968		0.2218	0.162446	0.0360155	6.791e-06
	rs80199364	2	223033867	A	C	PAX3	0.1389	2.841e-11	EnR-N		0.1257	0.107268	0.038158	0.004963		0.1344	0.07173	0.0645178	0.2661		0.1313	0.198833	0.033632	3.679e-09		0.126	0.107576	0.045396	0.01787
	rs80199364	2	223033867	A	C	PAX3	0.1309	3.785e-10	N-EnL		0.1257	0.0749946	0.0382315	0.04989		0.1344	0.0935046	0.0647627	0.1492		0.1313	0.19198	0.0336867	1.302e-08		0.126	0.117062	0.045352	0.009935
	rs80199364	2	223033867	A	C	PAX3	0.1355	4.056e-11	AlL-Sn		0.1257	0.10592	0.0356755	0.003009		0.1344	0.0672624	0.0654204	0.3043		0.1313	0.178187	0.0340898	1.821e-07		0.126	0.140554	0.0450154	0.001819
	rs80199364	2	223033867	A	C	PAX3	0.1167	1.273e-08	Sn-AlR		0.1257	0.0778806	0.0356102	0.0288		0.1344	0.0281813	0.0653607	0.6663		0.1313	0.140211	0.0341394	4.087e-05		0.126	0.179444	0.0448796	6.61e-05
	rs2218065	2	223034082	A	G	PAX3	0.0973	2.493e-11	EnR-N		0.3536	0.117494	0.0262082	7.64e-06		0.3583	0.0378329	0.0472478	0.4235		0.3513	0.139454	0.0235167	3.319e-09		0.3479	0.0178314	0.0316849	0.5737
	rs11690945	2	223035940	T	C	PAX3	-0.0912	1.102e-10	EnR-N		0.4542	-0.0721096	0.0250644	0.00405		0.4369	-0.0546557	0.0468565	0.2437		0.4477	-0.134506	0.0229768	5.215e-09		0.4438	-0.0582436	0.0305871	0.05704
	rs13020080	2	223036588	A	C	PAX3	-0.0916	8.606e-11	EnR-N		0.4542	-0.0721096	0.0250644	0.00405		0.4375	-0.0576411	0.0466329	0.2169		0.4478	-0.1344	0.0229625	5.236e-09		0.4445	-0.0593919	0.0305871	0.05224
	rs2118668	2	223037098	T	C	PAX3	-0.0916	8.77e-11	EnR-N		0.4542	-0.0721096	0.0250644	0.00405		0.4367	-0.0548513	0.0467335	0.2408		0.4477	-0.135676	0.0229688	3.809e-09		0.4438	-0.0582436	0.0305871	0.05704
	rs34221300	2	223038368	G	A	PAX3	-0.0914	1.006e-10	EnR-N		0.4542	-0.0721096	0.0250644	0.00405		0.4364	-0.0549464	0.0467167	0.2398		0.4468	-0.135464	0.0230185	4.334e-09		0.4433	-0.0579221	0.030633	0.05876
	rs1438620	2	223038461	G	A	PAX3	-0.0923	6.106e-11	EnR-N		0.455	-0.0712135	0.0250539	0.004494		0.4388	-0.0603806	0.0465322	0.1949		0.4491	-0.137379	0.0229462	2.344e-09		0.4473	-0.0573709	0.0305641	0.06056
	rs10210971	2	223038895	T	C	PAX3	0.1365	6.388e-11	EnR-N		0.1257	0.107268	0.038158	0.004963		0.1342	0.0628965	0.0645737	0.3305		0.131	0.196651	0.0336904	5.772e-09		0.1257	0.104866	0.0454006	0.02099
	rs10210971	2	223038895	T	C	PAX3	0.1287	7.594e-10	N-EnL		0.1257	0.0749946	0.0382315	0.04989		0.1342	0.0901326	0.0648698	0.1651		0.131	0.189177	0.0337574	2.243e-08		0.1257	0.114009	0.045352	0.01204
	rs10210971	2	223038895	T	C	PAX3	0.1353	4.489e-11	AlL-Sn		0.1257	0.10592	0.0356755	0.003009		0.1342	0.0675001	0.0654798	0.303		0.131	0.181799	0.0341343	1.062e-07		0.1257	0.133284	0.0450522	0.003121
	rs10210971	2	223038895	T	C	PAX3	0.1162	1.52e-08	Sn-AlR		0.1257	0.0778806	0.0356102	0.0288		0.1342	0.0255812	0.0654159	0.6957		0.131	0.143115	0.0341971	2.923e-05		0.1257	0.173256	0.044902	0.0001172
	rs10176525	2	223039052	A	T	PAX3	0.0959	6.163e-09	ExR-N		0.2228	0.0687719	0.0298172	0.02115		0.2312	0.0885958	0.0501605	0.07766		0.2268	0.107694	0.0268563	6.195e-05		0.2219	0.118388	0.0362084	0.001095
	rs10176525	2	223039052	A	T	PAX3	0.1398	3.384e-17	EnR-N		0.2228	0.151441	0.0300351	4.867e-07		0.2312	0.0702204	0.0508427	0.1674		0.2268	0.187446	0.0268087	3.2e-12		0.2219	0.0702322	0.0364666	0.05422
	rs10176525	2	223039052	A	T	PAX3	0.1268	2.479e-14	N-EnL		0.2228	0.115745	0.0301884	0.0001281		0.2312	0.0561991	0.0514516	0.275		0.2268	0.183093	0.026874	1.113e-11		0.2219	0.0749431	0.0364433	0.03989
	rs10176525	2	223039052	A	T	PAX3	0.0927	1.833e-08	N-ExL		0.2228	0.0965111	0.0294338	0.001055		0.2312	0.0463528	0.0506248	0.36		0.2268	0.0881655	0.0269949	0.001099		0.2219	0.118996	0.0361779	0.00102
	rs10176525	2	223039052	A	T	PAX3	0.0896	4.024e-08	Sn-AlR		0.2228	0.0810193	0.0282051	0.004105		0.2312	0.0217556	0.0514494	0.6725		0.2268	0.0753549	0.0272531	0.005727		0.2219	0.161775	0.0360081	7.368e-06
	rs10211404	2	223039180	A	G	PAX3	0.1388	2.883e-11	EnR-N		0.1257	0.107268	0.038158	0.004963		0.1346	0.07173	0.0645178	0.2661		0.1313	0.198833	0.033632	3.679e-09		0.1262	0.107301	0.0453593	0.01808
	rs10211404	2	223039180	A	G	PAX3	0.1308	3.804e-10	N-EnL		0.1257	0.0749946	0.0382315	0.04989		0.1346	0.0935046	0.0647627	0.1492		0.1313	0.19198	0.0336867	1.302e-08		0.1262	0.116882	0.0453071	0.009979
	rs10211404	2	223039180	A	G	PAX3	0.135	4.819e-11	AlL-Sn		0.1257	0.10592	0.0356755	0.003009		0.1346	0.0672624	0.0654204	0.3043		0.1313	0.178187	0.0340898	1.821e-07		0.1262	0.137984	0.0450008	0.002191
	rs10211404	2	223039180	A	G	PAX3	0.1164	1.384e-08	Sn-AlR		0.1257	0.0778806	0.0356102	0.0288		0.1346	0.0281813	0.0653607	0.6663		0.1313	0.140211	0.0341394	4.087e-05		0.1262	0.177878	0.0448498	7.525e-05
	rs11885004	2	223040476	A	G	PAX3	0.1394	2.375e-11	EnR-N		0.1257	0.107268	0.038158	0.004963		0.1343	0.0779357	0.0647415	0.229		0.1313	0.198673	0.0336278	3.784e-09		0.1262	0.107301	0.0453593	0.01808
	rs11885004	2	223040476	A	G	PAX3	0.1318	2.858e-10	N-EnL		0.1257	0.0749946	0.0382315	0.04989		0.1343	0.102657	0.0649233	0.1139		0.1313	0.192033	0.0336959	1.301e-08		0.1262	0.116882	0.0453071	0.009979
	rs11885004	2	223040476	A	G	PAX3	0.1352	4.592e-11	AlL-Sn		0.1257	0.10592	0.0356755	0.003009		0.1343	0.0682725	0.0657769	0.2993		0.1313	0.178338	0.0340925	1.776e-07		0.1262	0.137984	0.0450008	0.002191
	rs11885004	2	223040476	A	G	PAX3	0.117	1.172e-08	Sn-AlR		0.1257	0.0778806	0.0356102	0.0288		0.1343	0.0338506	0.0655815	0.6059		0.1313	0.140285	0.0341493	4.082e-05		0.1262	0.177878	0.0448498	7.525e-05
	rs66676446	2	223042703	A	T	PAX3	-0.0953	1.253e-10	EnR-N		0.454	-0.0721096	0.0250644	0.00405		NA	NA	NA	NA		0.4477	-0.135676	0.0229727	3.832e-09		0.4438	-0.0582895	0.0305871	0.05687
	rs11693823	2	223042948	C	G	PAX3	-0.0952	1.323e-10	EnR-N		0.454	-0.0721096	0.0250644	0.00405		NA	NA	NA	NA		0.4475	-0.135357	0.0229692	4.134e-09		0.4438	-0.0582895	0.0305871	0.05687
	rs13428038	2	223042991	A	G	PAX3	0.1417	1.028e-11	EnR-N		0.1265	0.110853	0.0381264	0.003665		0.1344	0.088726	0.0648533	0.1716		0.1321	0.197502	0.0335261	4.172e-09		0.1273	0.109459	0.0452766	0.01571
	rs13428038	2	223042991	A	G	PAX3	0.1326	2.106e-10	N-EnL		0.1265	0.0754128	0.0382036	0.04843		0.1344	0.109829	0.0650839	0.09173		0.1321	0.1896	0.0335753	1.756e-08		0.1273	0.120205	0.0452622	0.007951
	rs13428038	2	223042991	A	G	PAX3	0.1375	1.97e-11	AlL-Sn		0.1265	0.10853	0.0356442	0.002347		0.1344	0.0729072	0.0658363	0.2684		0.1321	0.178639	0.0339746	1.542e-07		0.1273	0.141729	0.04492	0.001623
	rs13428038	2	223042991	A	G	PAX3	0.1194	5.601e-09	Sn-AlR		0.1265	0.0802745	0.0355836	0.02417		0.1344	0.0384656	0.0656919	0.5584		0.1321	0.140285	0.034025	3.829e-05		0.1273	0.182575	0.0447678	4.704e-05
	rs1438605	2	223043337	G	A	PAX3	0.141	1.328e-11	EnR-N		0.1265	0.110853	0.0381264	0.003665		0.1343	0.088726	0.0648533	0.1716		0.1323	0.195427	0.0335152	5.993e-09		0.1273	0.109459	0.0452766	0.01571
	rs1438605	2	223043337	G	A	PAX3	0.1323	2.29e-10	N-EnL		0.1265	0.0754128	0.0382036	0.04843		0.1343	0.109829	0.0650839	0.09173		0.1323	0.188859	0.033569	1.98e-08		0.1273	0.120205	0.0452622	0.007951
	rs1438605	2	223043337	G	A	PAX3	0.1376	1.913e-11	AlL-Sn		0.1265	0.10853	0.0356442	0.002347		0.1343	0.0729072	0.0658363	0.2684		0.1323	0.178864	0.0339723	1.482e-07		0.1273	0.141729	0.04492	0.001623
	rs1438605	2	223043337	G	A	PAX3	0.1196	5.21e-09	Sn-AlR		0.1265	0.0802745	0.0355836	0.02417		0.1343	0.0384656	0.0656919	0.5584		0.1323	0.140955	0.0340225	3.503e-05		0.1273	0.182575	0.0447678	4.704e-05
	rs11694051	2	223043393	C	G	PAX3	-0.0952	1.333e-10	EnR-N		0.4542	-0.0746397	0.0250802	0.002935		NA	NA	NA	NA		0.4478	-0.134346	0.0229652	5.346e-09		0.4443	-0.0562225	0.0305641	0.06606
	rs11888649	2	223044244	C	T	PAX3	0.1426	1.177e-11	EnR-N		0.1259	0.107268	0.038158	0.004963		0.1336	0.0909064	0.0649651	0.1622		0.1296	0.204898	0.0339516	1.745e-09		0.1235	0.105417	0.0460712	0.02221
	rs11888649	2	223044244	C	T	PAX3	0.133	2.586e-10	N-EnL		0.1259	0.0749946	0.0382315	0.04989		0.1336	0.108384	0.0651374	0.09652		0.1296	0.196107	0.0339755	8.484e-09		0.1235	0.113605	0.0459807	0.0136
	rs11888649	2	223044244	C	T	PAX3	0.1363	4.377e-11	AlL-Sn		0.1259	0.10592	0.0356755	0.003009		0.1336	0.0659552	0.0660146	0.3182		0.1296	0.185787	0.0344178	7.149e-08		0.1235	0.132403	0.0456249	0.003756
	rs11888649	2	223044244	C	T	PAX3	0.1174	1.289e-08	Sn-AlR		0.1259	0.0778806	0.0356102	0.0288		0.1336	0.0400941	0.0659127	0.5433		0.1296	0.146838	0.0344285	2.045e-05		0.1235	0.167516	0.0454984	0.000237
	rs10169326	2	223051502	A	G	PAX3	0.1408	1.005e-12	EnR-N		0.14	0.13879	0.0362814	0.0001332		0.1524	0.0650769	0.0597656	0.2763		0.1518	0.196864	0.0317574	6.317e-10		0.142	0.0791433	0.0433244	0.06785
	rs10169326	2	223051502	A	G	PAX3	0.134	1.147e-11	N-EnL		0.14	0.0994817	0.0363403	0.00622		0.1524	0.064174	0.0596245	0.2822		0.1518	0.195842	0.0317616	7.767e-10		0.142	0.105118	0.043282	0.01524
	rs10169326	2	223051502	A	G	PAX3	0.1441	1.181e-13	AlL-Sn		0.14	0.128837	0.0338693	0.0001452		0.1524	0.0790868	0.0609046	0.1945		0.1518	0.170211	0.0321456	1.258e-07		0.142	0.154213	0.0429299	0.0003363
	rs10169326	2	223051502	A	G	PAX3	0.1212	4.159e-10	Sn-AlR		0.14	0.0905415	0.033844	0.0075		0.1524	0.0916926	0.0601164	0.1274		0.1518	0.126659	0.0322123	8.572e-05		0.142	0.175418	0.0428146	4.33e-05
	rs6728938	2	223053757	T	C	PAX3	0.1425	7.543e-13	EnR-N		0.1393	0.139897	0.0363816	0.0001226		0.1509	0.0682078	0.0606602	0.2612		0.1495	0.197556	0.0319359	6.858e-10		0.1406	0.0816697	0.0436643	0.06159
	rs6728938	2	223053757	T	C	PAX3	0.1353	9.825e-12	N-EnL		0.1393	0.0992959	0.0364379	0.006476		0.1509	0.0662079	0.0604274	0.2737		0.1495	0.198276	0.0319439	5.997e-10		0.1406	0.105477	0.0436188	0.01568
	rs6728938	2	223053757	T	C	PAX3	0.1434	2.17e-13	AlL-Sn		0.1393	0.12346	0.0339685	0.0002834		0.1509	0.0899011	0.0618553	0.1464		0.1495	0.17307	0.0323496	9.326e-08		0.1406	0.148999	0.0432824	0.000585
	rs6728938	2	223053757	T	C	PAX3	0.1191	1.056e-09	Sn-AlR		0.1393	0.0853814	0.0339451	0.01197		0.1509	0.094232	0.0609996	0.1226		0.1495	0.127329	0.0324157	8.734e-05		0.1406	0.171318	0.0431575	7.41e-05
	rs10498131	2	223055805	A	G	PAX3	-0.0961	1.218e-11	EnR-N		0.4389	-0.075325	0.0253385	0.002981		0.4092	-0.057753	0.046644	0.2158		0.4208	-0.14951	0.0230441	9.847e-11		0.426	-0.049011	0.0305733	0.1091
	rs10208761	2	223055976	C	A	PAX3	-0.0971	7.935e-12	EnR-N		0.4393	-0.0743762	0.0253438	0.003354		0.4097	-0.0591507	0.0467055	0.2055		0.422	-0.152969	0.0230513	3.687e-11		0.4272	-0.0479086	0.0305825	0.1175
	rs10208761	2	223055976	C	A	PAX3	-0.0777	4.747e-08	N-EnL		0.4393	-0.0415305	0.0254675	0.1031		0.4097	-0.0265206	0.0468647	0.5716		0.422	-0.129927	0.023094	1.979e-08		0.4272	-0.0599455	0.030561	0.05002
	rs10209300	2	223056500	G	A	PAX3	0.143	6.322e-13	EnR-N		0.1393	0.141215	0.0363921	0.0001066		0.1513	0.0669219	0.0607161	0.2706		0.1495	0.1983	0.031953	6.03e-10		0.1406	0.0816697	0.0436643	0.06159
	rs10209300	2	223056500	G	A	PAX3	0.1363	6.884e-12	N-EnL		0.1393	0.100783	0.0364519	0.00572		0.1513	0.06776	0.060588	0.2638		0.1495	0.199175	0.0319242	4.912e-10		0.1406	0.105477	0.0436188	0.01568
	rs10209300	2	223056500	G	A	PAX3	0.1437	1.992e-13	AlL-Sn		0.1393	0.123564	0.0339789	0.0002817		0.1513	0.0893663	0.0618553	0.149		0.1495	0.173898	0.0323712	8.265e-08		0.1406	0.148999	0.0432824	0.000585
	rs10209300	2	223056500	G	A	PAX3	0.1198	8.583e-10	Sn-AlR		0.1393	0.0852218	0.0339557	0.01212		0.1513	0.0983722	0.0609996	0.1071		0.1495	0.128222	0.0324449	7.886e-05		0.1406	0.171318	0.0431575	7.41e-05
	rs6741414	2	223057138	C	G	PAX3	0.107	8.806e-14	EnR-N		0.372	0.12208	0.0259183	2.573e-06		0.3804	0.053325	0.0457104	0.2436		0.381	0.148606	0.0232124	1.73e-10		0.3744	0.0354377	0.0311429	0.2553
	rs6741414	2	223057138	C	G	PAX3	0.0881	9.03e-10	N-EnL		0.372	0.0730431	0.0260994	0.005168		0.3804	0.02917	0.0458263	0.5246		0.381	0.142147	0.0232228	1.025e-09		0.3744	0.0397706	0.0311402	0.2017
	rs6741414	2	223057138	C	G	PAX3	0.079	2.298e-08	AlL-Sn		0.372	0.0739194	0.0243214	0.002398		0.3804	0.0418845	0.0460795	0.3636		0.381	0.0811173	0.0235875	0.0005901		0.3744	0.100091	0.0308866	0.001213
	rs2033807	2	223058987	T	C	PAX3	-0.0963	1.145e-11	EnR-N		0.439	-0.0732692	0.025349	0.003882		0.4133	-0.0550582	0.0467894	0.2396		0.422	-0.152915	0.0230503	3.748e-11		0.4272	-0.0479086	0.0305825	0.1175
	rs2033807	2	223058987	T	C	PAX3	-0.0787	3.152e-08	N-EnL		0.439	-0.0428733	0.0254722	0.09243		0.4133	-0.0334786	0.0469182	0.4756		0.422	-0.129821	0.0230916	2.029e-08		0.4272	-0.0599455	0.030561	0.05002
	rs16863491	2	223059484	C	T	PAX3	0.1428	2.122e-08	EnR-N		0.08155	0.235779	0.0454585	2.279e-07		0.07511	0.0813461	0.0791657	0.3043		0.07848	0.144509	0.0419839	0.000584		0.08158	0.0326357	0.0551661	0.5541
	rs79732694	2	223059659	T	C	PAX3	0.1419	1.031e-12	EnR-N		0.1395	0.139422	0.03635	0.0001278		0.1462	0.0593743	0.0622256	0.3403		0.1495	0.197502	0.0319428	6.989e-10		0.1409	0.0824965	0.0435633	0.0584
	rs79732694	2	223059659	T	C	PAX3	0.1356	9.834e-12	N-EnL		0.1395	0.100736	0.0364054	0.005694		0.1462	0.0604809	0.0623007	0.332		0.1495	0.197958	0.0319545	6.463e-10		0.1409	0.106645	0.0435155	0.01433
	rs79732694	2	223059659	T	C	PAX3	0.1456	9.756e-14	AlL-Sn		0.1395	0.124191	0.0339372	0.0002562		0.1462	0.108499	0.062806	0.0844		0.1495	0.172694	0.0323579	1.005e-07		0.1409	0.14966	0.0431796	0.0005363
	rs79732694	2	223059659	T	C	PAX3	0.1225	3.641e-10	Sn-AlR		0.1395	0.0874561	0.0339079	0.009944		0.1462	0.117307	0.0624901	0.0608		0.1495	0.128371	0.0324088	7.598e-05		0.1409	0.171243	0.0430531	7.201e-05
	rs35386469	2	223059716	T	C	PAX3	0.1428	2.122e-08	EnR-N		0.08155	0.235779	0.0454585	2.279e-07		0.07511	0.0813461	0.0791657	0.3043		0.07848	0.144509	0.0419839	0.000584		0.08158	0.0326357	0.0551661	0.5541
	rs11689830	2	223059899	T	C	PAX3	0.1421	8.062e-13	EnR-N		0.1403	0.138843	0.0362287	0.0001295		0.1509	0.0682078	0.0606602	0.2612		0.1494	0.197609	0.0319549	6.933e-10		0.1406	0.0816697	0.0436643	0.06159
	rs11689830	2	223059899	T	C	PAX3	0.1352	9.864e-12	N-EnL		0.1403	0.0992494	0.0362892	0.006275		0.1509	0.0662079	0.0604274	0.2737		0.1494	0.198223	0.0319611	6.191e-10		0.1406	0.105477	0.0436188	0.01568
	rs11689830	2	223059899	T	C	PAX3	0.1422	3.228e-13	AlL-Sn		0.1403	0.119545	0.0338328	0.0004172		0.1509	0.0899011	0.0618553	0.1464		0.1494	0.173522	0.0323674	8.788e-08		0.1406	0.148999	0.0432824	0.000585
	rs11689830	2	223059899	T	C	PAX3	0.1186	1.186e-09	Sn-AlR		0.1403	0.0834131	0.0338068	0.01364		0.1509	0.094232	0.0609996	0.1226		0.1494	0.127999	0.0324294	8.062e-05		0.1406	0.171318	0.0431575	7.41e-05
	rs1438607	2	223059951	G	A	PAX3	-0.0955	1.671e-11	EnR-N		0.438	-0.0730057	0.0253543	0.004		0.411	-0.0555837	0.046426	0.2315		0.4211	-0.151	0.0230464	6.48e-11		0.4256	-0.0477248	0.0305825	0.1188
	rs1438610	2	223060401	T	C	PAX3	-0.0966	9.97e-12	EnR-N		0.4386	-0.0751141	0.0253438	0.003051		0.4116	-0.0562434	0.0467335	0.2291		0.4224	-0.152596	0.0230508	4.12e-11		0.4276	-0.0465765	0.0305549	0.1274
	rs1438610	2	223060401	T	C	PAX3	-0.0784	3.552e-08	N-EnL		0.4386	-0.0430127	0.0254675	0.09132		0.4116	-0.0341637	0.0468219	0.4658		0.4224	-0.129027	0.0230983	2.497e-08		0.4276	-0.0595414	0.030543	0.05143
	rs991924	2	223060965	C	T	PAX3	0.1425	2.256e-08	EnR-N		0.08159	0.234356	0.0454322	2.648e-07		0.07511	0.0813461	0.0791657	0.3043		0.07848	0.144509	0.0419839	0.000584		0.08142	0.0331272	0.055212	0.5487
	rs991923	2	223061087	A	C	PAX3	0.1431	2.023e-08	EnR-N		0.08159	0.234356	0.0454322	2.648e-07		0.07511	0.0813461	0.0791657	0.3043		0.07848	0.144509	0.0419839	0.000584		0.08142	0.035208	0.0553498	0.5246
	rs991922	2	223061202	C	T	PAX3	0.1426	2.231e-08	EnR-N		0.08159	0.234356	0.0454322	2.648e-07		0.07511	0.0813461	0.0791657	0.3043		0.07848	0.144509	0.0419839	0.000584		0.08138	0.0333523	0.055212	0.5459
	rs2894457	2	223061353	T	G	PAX3	0.1426	2.231e-08	EnR-N		0.08159	0.234356	0.0454322	2.648e-07		0.07511	0.0813461	0.0791657	0.3043		0.07848	0.144509	0.0419839	0.000584		0.08138	0.0333523	0.055212	0.5459
	rs35403140	2	223062897	C	T	PAX3	0.1426	2.231e-08	EnR-N		0.08159	0.234356	0.0454322	2.648e-07		0.07511	0.0813461	0.0791657	0.3043		0.07848	0.144509	0.0419839	0.000584		0.08138	0.0333523	0.055212	0.5459
	rs13411018	2	223063023	A	G	PAX3	0.1424	7.267e-13	EnR-N		0.1403	0.138843	0.0362287	0.0001295		0.1509	0.0682078	0.0606602	0.2612		0.1494	0.197609	0.0319549	6.933e-10		0.1405	0.0830477	0.0436873	0.05741
	rs13411018	2	223063023	A	G	PAX3	0.1354	9.001e-12	N-EnL		0.1403	0.0992494	0.0362892	0.006275		0.1509	0.0662079	0.0604274	0.2737		0.1494	0.198223	0.0319611	6.191e-10		0.1405	0.106779	0.0436412	0.0145
	rs13411018	2	223063023	A	G	PAX3	0.1426	2.845e-13	AlL-Sn		0.1403	0.119545	0.0338328	0.0004172		0.1509	0.0899011	0.0618553	0.1464		0.1494	0.173522	0.0323674	8.788e-08		0.1405	0.150688	0.0432971	0.0005099
	rs13411018	2	223063023	A	G	PAX3	0.1189	1.071e-09	Sn-AlR		0.1403	0.0834131	0.0338068	0.01364		0.1509	0.094232	0.0609996	0.1226		0.1494	0.127999	0.0324294	8.062e-05		0.1405	0.172958	0.0431724	6.378e-05
	rs45608838	2	223065404	T	C	PAX3	0.144	1.578e-08	EnR-N		0.08164	0.238889	0.04539	1.514e-07		0.07511	0.0813461	0.0791657	0.3043		0.07848	0.144509	0.0419839	0.000584		0.08138	0.0333523	0.055212	0.5459
	rs13014735	2	223066237	A	G	PAX3	0.144	1.578e-08	EnR-N		0.08164	0.238889	0.04539	1.514e-07		0.07511	0.0813461	0.0791657	0.3043		0.07848	0.144509	0.0419839	0.000584		0.08138	0.0333523	0.055212	0.5459
	rs2855268	2	223066919	G	C	PAX3	0.1421	8.062e-13	EnR-N		0.1403	0.138843	0.0362287	0.0001295		0.1509	0.0682078	0.0606602	0.2612		0.1494	0.197609	0.0319549	6.933e-10		0.1406	0.0816697	0.0436643	0.06159
	rs2855268	2	223066919	G	C	PAX3	0.1352	9.864e-12	N-EnL		0.1403	0.0992494	0.0362892	0.006275		0.1509	0.0662079	0.0604274	0.2737		0.1494	0.198223	0.0319611	6.191e-10		0.1406	0.105477	0.0436188	0.01568
	rs2855268	2	223066919	G	C	PAX3	0.1422	3.228e-13	AlL-Sn		0.1403	0.119545	0.0338328	0.0004172		0.1509	0.0899011	0.0618553	0.1464		0.1494	0.173522	0.0323674	8.788e-08		0.1406	0.148999	0.0432824	0.000585
	rs2855268	2	223066919	G	C	PAX3	0.1186	1.186e-09	Sn-AlR		0.1403	0.0834131	0.0338068	0.01364		0.1509	0.094232	0.0609996	0.1226		0.1494	0.127999	0.0324294	8.062e-05		0.1406	0.171318	0.0431575	7.41e-05
	rs7559271	2	223068286	G	A	PAX3	0.1072	7.795e-14	EnR-N		0.3735	0.120973	0.025892	3.103e-06		0.3804	0.053325	0.0457104	0.2436		0.3812	0.148606	0.0231943	1.673e-10		0.3745	0.03767	0.0311291	0.2264
	rs7559271	2	223068286	G	A	PAX3	0.0883	8.346e-10	N-EnL		0.3735	0.0720209	0.0260762	0.005764		0.3804	0.02917	0.0458263	0.5246		0.3812	0.14257	0.0232048	8.888e-10		0.3745	0.0409695	0.0311133	0.1881
	rs7559271	2	223068286	G	A	PAX3	0.0786	2.611e-08	AlL-Sn		0.3735	0.0720923	0.0242953	0.003036		0.3804	0.0418845	0.0460795	0.3636		0.3812	0.0815688	0.023568	0.0005448		0.3745	0.100385	0.0308499	0.001159
	rs7588737	2	223068821	T	A	PAX3	-0.0948	2.323e-11	EnR-N		0.4383	-0.0760102	0.0253807	0.002763		0.4065	-0.0494003	0.0468118	0.2916		0.4213	-0.149138	0.023008	1.026e-10		0.4267	-0.0456487	0.0305779	0.1356
	rs34364313	2	223069868	C	T	PAX3	-0.0949	2.177e-11	EnR-N		0.438	-0.0730057	0.0253543	0.004		0.4107	-0.0579766	0.0463142	0.2109		0.4212	-0.149883	0.0230093	8.329e-11		0.4262	-0.0455017	0.0306284	0.1375
	rs7602893	2	223070813	T	C	PAX3	0.144	1.557e-08	EnR-N		0.08164	0.238889	0.04539	1.514e-07		0.07511	0.0813461	0.0791657	0.3043		0.07859	0.144456	0.0419441	0.0005799		0.08135	0.0334809	0.055212	0.5442
	rs66857703	2	223070861	C	T	PAX3	0.1433	1.837e-08	EnR-N		0.08168	0.236359	0.0453584	2.001e-07		0.07511	0.0813461	0.0791657	0.3043		0.07859	0.144456	0.0419441	0.0005799		0.08135	0.0334809	0.055212	0.5442
	rs2855266	2	223072019	A	T	PAX3	0.1421	8.36e-13	EnR-N		0.1403	0.138843	0.0362287	0.0001295		0.1512	0.0682078	0.0606602	0.2612		0.1493	0.193938	0.0319449	1.401e-09		0.1402	0.0879625	0.0437424	0.04445
	rs2855266	2	223072019	A	T	PAX3	0.1353	9.59e-12	N-EnL		0.1403	0.0992494	0.0362892	0.006275		0.1512	0.0662079	0.0604274	0.2737		0.1493	0.195631	0.0319501	1.014e-09		0.1402	0.110821	0.0437669	0.01141
	rs2855266	2	223072019	A	T	PAX3	0.1427	2.786e-13	AlL-Sn		0.1403	0.119545	0.0338328	0.0004172		0.1512	0.0899011	0.0618553	0.1464		0.1493	0.171415	0.0323424	1.226e-07		0.1402	0.154874	0.0434072	0.0003679
	rs2855266	2	223072019	A	T	PAX3	0.119	1.042e-09	Sn-AlR		0.1403	0.0834131	0.0338068	0.01364		0.1512	0.094232	0.0609996	0.1226		0.1493	0.126882	0.0324009	9.165e-05		0.1402	0.175865	0.0433066	5.062e-05
	rs34532972	2	223074558	C	CA	PAX3	0.1445	1.394e-08	EnR-N		0.08168	0.240998	0.0453848	1.167e-07		0.07521	0.0813461	0.0791657	0.3043		0.07871	0.144988	0.041916	0.0005474		0.08116	0.0314093	0.0552579	0.5699
	rs7588554	2	223074651	G	A	PAX3	-0.0942	2.785e-11	EnR-N		0.438	-0.0724786	0.0253649	0.004283		0.4107	-0.0553769	0.0462191	0.2312		0.4211	-0.148712	0.0229459	1.035e-10		0.426	-0.0461172	0.0305457	0.1312
	rs35887641	2	223075071	T	C	PAX3	-0.0942	2.785e-11	EnR-N		0.438	-0.0724786	0.0253649	0.004283		0.4106	-0.0553769	0.0462191	0.2312		0.4211	-0.148712	0.0229459	1.035e-10		0.426	-0.0461172	0.0305457	0.1312
	rs7565552	2	223075268	T	C	PAX3	-0.0942	2.798e-11	EnR-N		0.438	-0.0724786	0.0253649	0.004283		0.4106	-0.0553769	0.0462191	0.2312		0.4211	-0.148712	0.0229459	1.035e-10		0.426	-0.0460712	0.0305503	0.1317
	rs6730989	2	223079344	A	G	PAX3	0.1431	4.389e-13	EnR-N		0.1403	0.138843	0.0362287	0.0001295		0.1518	0.0758112	0.0598775	0.2057		0.1499	0.196917	0.0317608	6.252e-10		0.1415	0.0839204	0.0434163	0.05335
	rs6730989	2	223079344	A	G	PAX3	0.1362	5.526e-12	N-EnL		0.1403	0.0992494	0.0362892	0.006275		0.1518	0.0762702	0.0597316	0.2018		0.1499	0.19727	0.0317871	6.028e-10		0.1415	0.106779	0.0433718	0.01389
	rs6730989	2	223079344	A	G	PAX3	0.1408	4.263e-13	AlL-Sn		0.1403	0.119545	0.0338328	0.0004172		0.1518	0.0840186	0.0610234	0.1689		0.1499	0.169759	0.0321453	1.359e-07		0.1415	0.151422	0.0430327	0.0004435
	rs6730989	2	223079344	A	G	PAX3	0.1178	1.266e-09	Sn-AlR		0.1403	0.0834131	0.0338068	0.01364		0.1518	0.0936247	0.0600612	0.1195		0.1499	0.124276	0.0322209	0.000117		0.1415	0.173853	0.0429115	5.265e-05
	rs2578449	2	223080192	A	G	PAX3	0.1444	2.598e-13	EnR-N		0.1403	0.138843	0.0362287	0.0001295		0.1524	0.0815698	0.0597656	0.1724		0.1499	0.198833	0.0317522	4.226e-10		0.1415	0.0839204	0.0434163	0.05335
	rs2578449	2	223080192	A	G	PAX3	0.1375	3.426e-12	N-EnL		0.1403	0.0992494	0.0362892	0.006275		0.1524	0.0781435	0.0596245	0.1901		0.1499	0.200074	0.031773	3.388e-10		0.1415	0.106779	0.0433718	0.01389
	rs2578449	2	223080192	A	G	PAX3	0.1397	6.356e-13	AlL-Sn		0.1403	0.119545	0.0338328	0.0004172		0.1524	0.0852664	0.0608451	0.1615		0.1499	0.166599	0.032162	2.337e-07		0.1415	0.151422	0.0430327	0.0004435
	rs2578449	2	223080192	A	G	PAX3	0.1164	1.95e-09	Sn-AlR		0.1403	0.0834131	0.0338068	0.01364		0.1524	0.0940112	0.0598955	0.117		0.1499	0.120478	0.032248	0.0001901		0.1415	0.173853	0.0429115	5.265e-05
	rs6749169	2	223081784	C	A	PAX3	0.1406	4.129e-08	EnR-N		0.08168	0.240998	0.0453848	1.167e-07		0.07399	0.054678	0.0811225	0.5004		0.07797	0.141263	0.0422059	0.0008258		0.08058	0.0290345	0.0556254	0.6018
	rs7590866	2	223087329	A	G	PAX3	0.1593	6.532e-13	EnR-N		0.1406	0.13705	0.0362129	0.0001565		0.1527	0.0815698	0.0597656	0.1724		0.1497	0.1983	0.031723	4.548e-10		NA	NA	NA	NA
	rs7590866	2	223087329	A	G	PAX3	0.1435	9.686e-11	N-EnL		0.1406	0.0972979	0.0362706	0.007329		0.1527	0.0781435	0.0596245	0.1901		0.1497	0.197376	0.0317376	5.561e-10		NA	NA	NA	NA
	rs7590866	2	223087329	A	G	PAX3	0.1362	3.825e-10	AlL-Sn		0.1406	0.117927	0.0338119	0.000493		0.1527	0.0852664	0.0608451	0.1615		0.1497	0.1669	0.0321332	2.167e-07		NA	NA	NA	NA
	rs17401668	2	223089739	G	A	PAX3	0.1448	2.375e-13	EnR-N		0.1401	0.138474	0.036292	0.0001387		0.1527	0.0815698	0.0597656	0.1724		0.1496	0.198354	0.0317264	4.515e-10		0.1415	0.0864927	0.043499	0.04688
	rs17401668	2	223089739	G	A	PAX3	0.1374	3.57e-12	N-EnL		0.1401	0.0998534	0.0363496	0.006041		0.1527	0.0781435	0.0596245	0.1901		0.1496	0.197588	0.0317359	5.335e-10		0.1415	0.109743	0.0434571	0.01163
	rs17401668	2	223089739	G	A	PAX3	0.1412	3.807e-13	AlL-Sn		0.1401	0.119493	0.0338902	0.0004291		0.1527	0.0852664	0.0608451	0.1615		0.1496	0.167728	0.0321441	1.905e-07		0.1415	0.156489	0.0431061	0.0002899
	rs17401668	2	223089739	G	A	PAX3	0.1169	1.698e-09	Sn-AlR		0.1401	0.0840515	0.0338653	0.01311		0.1527	0.0940112	0.0598955	0.117		0.1496	0.119213	0.0322109	0.0002176		0.1415	0.177506	0.042986	3.782e-05
	rs752172	2	223092217	A	G	PAX3	0.1449	2.24e-13	EnR-N		0.1402	0.137894	0.0362814	0.0001474		0.1527	0.0815698	0.0597656	0.1724		0.1497	0.199152	0.031702	3.739e-10		0.1413	0.0861711	0.0435219	0.04778
	rs752172	2	223092217	A	G	PAX3	0.1376	3.226e-12	N-EnL		0.1402	0.0998999	0.0363403	0.005998		0.1527	0.0781435	0.0596245	0.1901		0.1497	0.198487	0.0317022	4.274e-10		0.1413	0.108845	0.0434751	0.01236
	rs752172	2	223092217	A	G	PAX3	0.1413	3.588e-13	AlL-Sn		0.1402	0.119493	0.0338902	0.0004291		0.1527	0.0852664	0.0608451	0.1615		0.1497	0.16848	0.0321159	1.639e-07		0.1413	0.155681	0.0431282	0.0003126
	rs752172	2	223092217	A	G	PAX3	0.1173	1.513e-09	Sn-AlR		0.1402	0.0840515	0.0338653	0.01311		0.1527	0.0940112	0.0598955	0.117		0.1497	0.119734	0.0321952	0.0002031		0.1413	0.178326	0.0430009	3.499e-05
	rs13400426	2	223095131	A	G	PAX3	0.1434	3.887e-13	EnR-N		0.1416	0.129302	0.0361866	0.0003571		0.1552	0.0942609	0.0598775	0.116		0.1496	0.198354	0.0317264	4.515e-10		0.1413	0.0861711	0.0435219	0.04778
	rs13400426	2	223095131	A	G	PAX3	0.1354	6.923e-12	N-EnL		0.1416	0.0900493	0.0362428	0.01304		0.1552	0.0890086	0.0596245	0.1358		0.1496	0.197588	0.0317359	5.335e-10		0.1413	0.108845	0.0434751	0.01236
	rs13400426	2	223095131	A	G	PAX3	0.1403	5.218e-13	AlL-Sn		0.1416	0.117196	0.0337806	0.00053		0.1552	0.0855041	0.0612017	0.1625		0.1496	0.167728	0.0321441	1.905e-07		0.1413	0.155681	0.0431282	0.0003126
	rs13400426	2	223095131	A	G	PAX3	0.1179	1.21e-09	Sn-AlR		0.1416	0.085275	0.0337536	0.01156		0.1552	0.0984274	0.060006	0.1014		0.1496	0.119213	0.0322109	0.0002176		0.1413	0.178326	0.0430009	3.499e-05
	rs1549773	2	223095968	T	C	PAX3	0.1443	2.566e-13	EnR-N		0.1402	0.138474	0.036292	0.0001387		0.1535	0.0836943	0.0597097	0.1613		0.15	0.196332	0.0316511	6.156e-10		0.1415	0.0869979	0.0434163	0.04524
	rs1549773	2	223095968	T	C	PAX3	0.1357	6.344e-12	N-EnL		0.1402	0.0998534	0.0363496	0.006041		0.1535	0.0806055	0.059571	0.1762		0.15	0.192139	0.0316904	1.473e-09		0.1415	0.110012	0.0433718	0.01128
	rs1549773	2	223095968	T	C	PAX3	0.1421	2.494e-13	AlL-Sn		0.1402	0.119493	0.0338902	0.0004291		0.1535	0.0841968	0.0607857	0.1665		0.15	0.170662	0.0320975	1.115e-07		0.1415	0.156342	0.0430254	0.000286
	rs1549773	2	223095968	T	C	PAX3	0.1185	9.64e-10	Sn-AlR		0.1402	0.0840515	0.0338653	0.01311		0.1535	0.0953912	0.0598403	0.1113		0.15	0.122787	0.0321515	0.0001362		0.1415	0.178177	0.042904	3.402e-05
	rs2118666	2	223100523	T	G	PAX3	-0.0875	5.136e-10	EnR-N		0.4816	-0.0895571	0.0253701	0.0004208		0.4553	-0.0543649	0.0451681	0.229		0.4721	-0.121204	0.0228343	1.175e-07		0.4776	-0.0398656	0.0303896	0.1897
	rs2118666	2	223100523	T	G	PAX3	-0.0771	4.58e-08	N-EnL		0.4816	-0.0545035	0.0254907	0.03257		0.4553	-0.0291539	0.0454142	0.5211		0.4721	-0.111834	0.02287	1.05e-06		0.4776	-0.0695996	0.0303499	0.02191
	rs13410020	2	223102937	A	G	PAX3	0.1487	1.212e-12	EnR-N		0.1426	0.136471	0.0360548	0.0001568		NA	NA	NA	NA		0.1496	0.20708	0.0318682	9.241e-11		0.1404	0.0576924	0.0435403	0.1852
	rs13410020	2	223102937	A	G	PAX3	0.1311	4.087e-10	N-EnL		0.1426	0.0896776	0.0361824	0.01326		NA	NA	NA	NA		0.1496	0.195578	0.0319206	9.915e-10		0.1404	0.0711712	0.043511	0.1021
	rs13410020	2	223102937	A	G	PAX3	0.1287	3.668e-10	AlL-Sn		0.1426	0.126122	0.0336709	0.0001832		NA	NA	NA	NA		0.1496	0.134694	0.0323783	3.248e-05		0.1404	0.122195	0.0431796	0.004693
	rs13388386	2	223104418	G	A	PAX3	0.1272	1.399e-08	EnR-N		0.09843	0.0813341	0.0421904	0.0539		0.1067	-0.0201325	0.0684314	0.7687		0.1119	0.244005	0.0358304	1.138e-11		0.1125	0.0496541	0.0479086	0.3004
	rs13388386	2	223104418	G	A	PAX3	0.1226	4.907e-08	N-EnL		0.09843	0.0514368	0.0422228	0.2231		0.1067	0.000513445	0.0686164	0.994		0.1119	0.240861	0.0360301	2.652e-11		0.1125	0.0646603	0.0478666	0.177
	rs11679619	2	223106519	G	A	PAX3	0.1265	1.994e-08	EnR-N		0.09856	0.0818612	0.0421114	0.05207		0.105	-0.00589829	0.0687668	0.9316		0.1116	0.240759	0.0359611	2.478e-11		0.1108	0.0426768	0.0488273	0.3822
	rs11679619	2	223106519	G	A	PAX3	0.1231	4.823e-08	N-EnL		0.09856	0.0554793	0.0421485	0.1884		0.105	0.00901326	0.0686164	0.8955		0.1116	0.236471	0.0360199	5.919e-11		0.1108	0.0633132	0.0488096	0.1945
	rs1966690	2	223389337	A	G	PAX3	0.0776	1.583e-08	AlL-Sn		0.4638	0.0835248	0.0233191	0.0003474		0.4738	0.0406129	0.0445346	0.362		0.4758	0.0776559	0.0232433	0.0008431		0.4856	0.0845967	0.0300348	0.0049
	rs113663609	3	99924002	A	G	CMSS1	-0.1166	3.458e-08	EnR-ChR		0.1389	-0.109463	0.0344903	0.001519		NA	NA	NA	NA		0.1357	-0.123013	0.0322445	0.0001386		0.1166	-0.116029	0.0478182	0.01532
	rs6800438	3	99924774	C	A	CMSS1	-0.1163	3.618e-08	EnR-ChR		0.139	-0.109463	0.0344903	0.001519		NA	NA	NA	NA		0.1359	-0.122013	0.032202	0.0001538		0.1168	-0.116615	0.047664	0.01451
	rs6816030	4	127813836	T	G	INTU	-0.0783	2.689e-08	Prn-AlL		0.376	-0.0509676	0.0240416	0.03414		0.3798	-0.0510883	0.0458145	0.2652		0.3863	-0.114986	0.0233854	9.147e-07		0.3687	-0.071703	0.03158	0.02327
	rs6816030	4	127813836	T	G	INTU	-0.0775	4.383e-08	Prn-AlR		0.376	-0.0490297	0.0242358	0.04312		0.3798	-0.00848575	0.0462316	0.8544		0.3863	-0.123272	0.0234848	1.616e-07		0.3687	-0.0754156	0.0315737	0.017
	rs2391124	4	127814585	C	G	INTU	-0.0786	3.949e-08	Prn-AlR		0.3583	-0.0374081	0.0245254	0.1273		0.3616	-0.0238724	0.0458732	0.6028		0.3708	-0.134526	0.0236925	1.471e-08		0.3453	-0.0734199	0.0322617	0.02298
	rs1510666	4	127815859	G	A	INTU	-0.0808	1.583e-08	Prn-AlR		0.3588	-0.037726	0.0245254	0.1241		0.362	-0.0238724	0.0458732	0.6028		0.3712	-0.134329	0.0236703	1.497e-08		0.3496	-0.084081	0.0321146	0.008918
	rs62323516	4	127817772	A	T	INTU	-0.0797	2.515e-08	Prn-AlR		0.3579	-0.0370195	0.0245325	0.1313		0.3609	-0.0230879	0.045913	0.6151		0.3706	-0.133013	0.0236803	2.091e-08		0.3479	-0.082453	0.0321146	0.01031
	rs1510668	4	127819706	G	A	INTU	-0.0789	2.139e-08	Prn-AlL		0.3767	-0.0508543	0.0240491	0.03448		0.3812	-0.0494387	0.0458291	0.2812		0.3872	-0.116965	0.0233697	5.851e-07		0.3714	-0.0715446	0.0314955	0.02324
	rs1510668	4	127819706	G	A	INTU	-0.0776	4.156e-08	Prn-AlR		0.3767	-0.0485351	0.0242428	0.04542		0.3812	-0.00510499	0.0462316	0.9121		0.3872	-0.123864	0.0234636	1.373e-07		0.3714	-0.0769386	0.0314844	0.01458
	rs1510671	4	127820113	A	G	INTU	-0.0811	1.422e-08	Prn-AlR		0.3577	-0.0372668	0.0245678	0.1293		0.3593	-0.0274483	0.0461121	0.5517		0.3711	-0.13321	0.0236691	1.955e-08		0.3503	-0.0861817	0.0320359	0.007198
	rs1995903	4	127820621	G	A	INTU	-0.0784	2.532e-08	Prn-AlL		0.3769	-0.0508543	0.0240491	0.03448		0.3814	-0.0494387	0.0458291	0.2812		0.3875	-0.116174	0.0233703	6.96e-07		0.3724	-0.070911	0.0314902	0.02445
	rs1995903	4	127820621	G	A	INTU	-0.0774	4.48e-08	Prn-AlR		0.3769	-0.0485351	0.0242428	0.04542		0.3814	-0.00510499	0.0462316	0.9121		0.3875	-0.12393	0.0234716	1.367e-07		0.3724	-0.0759933	0.0314844	0.01587
	rs60444403	4	127821551	T	C	INTU	-0.0792	3.216e-08	Prn-AlR		0.3584	-0.036419	0.0245431	0.138		0.3611	-0.0230879	0.045913	0.6151		0.3721	-0.131367	0.0237769	3.518e-08		0.3486	-0.0845537	0.0320359	0.008349
	rs11361150	4	127821986	CA	C	INTU	-0.0784	2.566e-08	Prn-AlL		0.3756	-0.0506278	0.0240303	0.03518		0.3812	-0.0546786	0.0459067	0.2341		0.3864	-0.115052	0.0233798	8.994e-07		0.3691	-0.070911	0.031543	0.02465
	rs11361150	4	127821986	CA	C	INTU	-0.0778	3.926e-08	Prn-AlR		0.3756	-0.0491003	0.0242252	0.04281		0.3812	-0.0118904	0.0463909	0.7977		0.3864	-0.123272	0.0234848	1.611e-07		0.3691	-0.0748904	0.0315369	0.01762
	rs17274168	4	127824368	C	G	INTU	-0.0792	3.132e-08	Prn-AlR		0.3584	-0.036419	0.0245431	0.138		0.3609	-0.0234145	0.0459529	0.6104		0.3715	-0.132025	0.0238141	3.164e-08		0.3476	-0.0837659	0.0319361	0.008786
	rs6534591	4	127825185	A	G	INTU	-0.0792	3.024e-08	Prn-AlR		0.3598	-0.0369842	0.024536	0.1319		0.3628	-0.0200656	0.0457936	0.6612		0.3728	-0.129853	0.0237696	4.985e-08		0.352	-0.0878623	0.0318153	0.005791
	rs1510675	4	127826682	G	A	INTU	-0.0776	3.496e-08	Prn-AlL		0.3769	-0.0499482	0.0240793	0.03813		0.3799	-0.0525923	0.0456835	0.25		0.3861	-0.114194	0.0233861	1.09e-06		0.3687	-0.070647	0.0314216	0.02464
	rs1510675	4	127826682	G	A	INTU	-0.0777	3.934e-08	Prn-AlR		0.3769	-0.0493476	0.0242711	0.0421		0.3799	-0.0152513	0.0457538	0.739		0.3861	-0.122416	0.0234829	1.963e-07		0.3687	-0.0745228	0.0314214	0.0178
	rs7657229	4	127827768	G	A	INTU	-0.0805	1.742e-08	Prn-AlR		0.3592	-0.0392449	0.024529	0.1097		0.3622	-0.0215787	0.0457538	0.6372		0.3711	-0.132025	0.0236689	2.612e-08		0.3497	-0.0852364	0.0319571	0.007712
	rs56305646	4	127827869	T	G	INTU	-0.0799	2.305e-08	Prn-AlR		0.358	-0.0380439	0.0245396	0.1213		0.3606	-0.0245653	0.0458732	0.5923		0.3701	-0.132025	0.0237072	2.75e-08		0.3472	-0.0828731	0.0319623	0.009573
	rs35273747	4	127828094	A	AT	INTU	-0.0774	3.801e-08	Prn-AlL		0.3763	-0.0527797	0.0240454	0.02823		0.3796	-0.0487595	0.0457029	0.2861		0.3879	-0.112413	0.0234341	1.673e-06		0.3694	-0.0702774	0.031411	0.02539
	rs35273747	4	127828094	A	AT	INTU	-0.0775	4.409e-08	Prn-AlR		0.3763	-0.0505133	0.0242393	0.03719		0.3796	-0.00623589	0.0461121	0.8925		0.3879	-0.122416	0.0235325	2.083e-07		0.3694	-0.0757307	0.0314109	0.01601
	rs2048378	4	127829428	G	A	INTU	-0.0797	2.498e-08	Prn-AlR		0.3583	-0.0381499	0.0245466	0.1203		0.3609	-0.0253458	0.0458334	0.5803		0.3701	-0.132025	0.0237072	2.75e-08		0.3481	-0.0812976	0.0319518	0.01101
	rs1848932	4	127831295	C	A	INTU	-0.0804	1.842e-08	Prn-AlR		0.3587	-0.0409405	0.024529	0.09517		0.3618	-0.0218057	0.0458732	0.6347		0.3708	-0.130446	0.0237174	4.066e-08		0.3499	-0.0849213	0.0319046	0.007848
	rs1877070	4	127831842	A	C	INTU	-0.0807	1.651e-08	Prn-AlR		0.3586	-0.0409405	0.024529	0.09517		0.3618	-0.0218057	0.0458732	0.6347		0.3707	-0.13117	0.0237282	3.468e-08		0.3495	-0.0851314	0.0319151	0.007712
	rs1510677	4	127831937	C	T	INTU	-0.0787	2.498e-08	Prn-AlL		0.3611	-0.0472677	0.0242455	0.05129		0.3635	-0.063169	0.0456641	0.167		0.3707	-0.116569	0.0236305	8.468e-07		0.3575	-0.072231	0.0310203	0.01997
	rs1510677	4	127831937	C	T	INTU	-0.0802	1.627e-08	Prn-AlR		0.3611	-0.0418589	0.0244336	0.08681		0.3635	-0.0199182	0.0461121	0.666		0.3707	-0.13117	0.0237282	3.468e-08		0.3575	-0.0820853	0.031017	0.008187
	rs1510678	4	127831998	A	G	INTU	-0.0807	1.651e-08	Prn-AlR		0.3586	-0.0409405	0.024529	0.09517		0.3618	-0.0218057	0.0458732	0.6347		0.3707	-0.13117	0.0237282	3.468e-08		0.3495	-0.0851314	0.0319151	0.007712
	rs7689620	4	127832645	C	A	INTU	-0.0807	1.651e-08	Prn-AlR		0.3586	-0.0409405	0.024529	0.09517		0.3618	-0.0218057	0.0458732	0.6347		0.3707	-0.13117	0.0237282	3.468e-08		0.3495	-0.0851314	0.0319151	0.007712
	rs7695040	4	127833073	C	G	INTU	-0.0798	1.483e-08	Prn-AlL		0.3757	-0.055347	0.0240567	0.02151		0.3792	-0.0483131	0.0458097	0.2919		0.3859	-0.11525	0.0234391	9.19e-07		0.3691	-0.072495	0.0313688	0.02097
	rs7695040	4	127833073	C	G	INTU	-0.0776	4.153e-08	Prn-AlR		0.3757	-0.0522441	0.0242499	0.03131		0.3792	-0.00644694	0.0462316	0.8891		0.3859	-0.121232	0.0235355	2.731e-07		0.3691	-0.0754681	0.0313741	0.01619
	rs1397432	4	127835677	A	G	INTU	-0.0783	3.806e-08	Prn-AlL		0.3541	-0.045531	0.0243587	0.06173		0.3594	-0.0630235	0.0456496	0.1679		0.3689	-0.117229	0.0236779	7.704e-07		0.3498	-0.071439	0.0319337	0.02533
	rs1397432	4	127835677	A	G	INTU	-0.0816	1.2e-08	Prn-AlR		0.3541	-0.0442963	0.0245466	0.07115		0.3594	-0.0266877	0.0461121	0.5628		0.3689	-0.128537	0.0237679	6.795e-08		0.3498	-0.0862868	0.0319413	0.006947
	rs6828035	4	127837966	T	G	INTU	-0.0779	4.587e-08	Prn-AlL		0.3541	-0.045531	0.0243587	0.06173		0.3594	-0.0630235	0.0456496	0.1679		0.3689	-0.117229	0.0236779	7.704e-07		0.3495	-0.0691158	0.0319548	0.03069
	rs6828035	4	127837966	T	G	INTU	-0.0812	1.42e-08	Prn-AlR		0.3541	-0.0442963	0.0245466	0.07115		0.3594	-0.0266877	0.0461121	0.5628		0.3689	-0.128537	0.0237679	6.795e-08		0.3495	-0.0842911	0.0319623	0.008435
	rs57018884	4	127841306	G	C	INTU	-0.0795	2.797e-08	Prn-AlR		0.357	-0.0419296	0.024483	0.08691		0.3607	-0.0216186	0.04659	0.6427		0.3691	-0.124851	0.0237586	1.566e-07		0.3473	-0.0887551	0.0319728	0.005535
	rs4834157	4	127842176	G	A	INTU	-0.0795	2.167e-08	Prn-AlL		0.3559	-0.0471922	0.024321	0.05246		0.3617	-0.0651097	0.0453099	0.1509		0.37	-0.113799	0.0235901	1.467e-06		0.3503	-0.0795175	0.0318915	0.01275
	rs4834157	4	127842176	G	A	INTU	-0.0806	1.656e-08	Prn-AlR		0.3559	-0.0431659	0.0245113	0.07846		0.3617	-0.0243025	0.0457139	0.5952		0.37	-0.124391	0.023698	1.611e-07		0.3503	-0.0920112	0.0319046	0.003965
	rs4834157	4	127842176	G	A	INTU	-0.0788	4.24e-08	AlL-AlR		0.3559	-0.067269	0.0253053	0.007881		0.3617	-0.101778	0.0449743	0.02384		0.37	-0.0817522	0.0236278	0.0005463		0.3503	-0.0802421	0.0318095	0.01174
	rs4391044	4	127842534	C	G	INTU	-0.0788	1.963e-08	Prn-AlL		0.3755	-0.0528552	0.0239925	0.02767		0.3813	-0.0476388	0.0459261	0.2999		0.385	-0.111885	0.0233679	1.752e-06		0.3677	-0.0781975	0.0311259	0.01207
	rs11735147	4	127844803	T	A	INTU	-0.0789	2.679e-08	Prn-AlL		0.356	-0.0471167	0.0243247	0.05279		0.3613	-0.0652067	0.0452857	0.1502		0.3696	-0.113997	0.0235725	1.377e-06		0.3481	-0.0759799	0.0317172	0.0167
	rs11735147	4	127844803	T	A	INTU	-0.0808	1.445e-08	Prn-AlR		0.356	-0.0439077	0.0245148	0.07327		0.3613	-0.0258117	0.0457139	0.5724		0.3696	-0.125444	0.0236731	1.235e-07		0.3481	-0.0888601	0.0317103	0.00513
	rs4345195	4	127847576	G	A	INTU	-0.0831	3.215e-09	Prn-AlL		0.3756	-0.0632375	0.0240378	0.008571		0.38	-0.0528834	0.0458436	0.249		0.3849	-0.112611	0.0233682	1.499e-06		0.3677	-0.0781975	0.0311259	0.01207
	rs4345195	4	127847576	G	A	INTU	-0.078	3.31e-08	Prn-AlR		0.3756	-0.0569776	0.0242358	0.01875		0.38	-0.00745042	0.0462714	0.8721		0.3849	-0.11544	0.0234729	9.111e-07		0.3677	-0.0787242	0.0311221	0.01148
	rs4373175	4	127847693	G	A	INTU	-0.0806	1.33e-08	Prn-AlL		0.3562	-0.0522134	0.0243738	0.03229		0.3613	-0.0652067	0.0452857	0.1502		0.3696	-0.113997	0.0235725	1.377e-06		0.3481	-0.0759799	0.0317172	0.0167
	rs4373175	4	127847693	G	A	INTU	-0.0815	1.09e-08	Prn-AlR		0.3562	-0.0459565	0.0245643	0.0615		0.3613	-0.0258117	0.0457139	0.5724		0.3696	-0.125444	0.0236731	1.235e-07		0.3481	-0.0888601	0.0317103	0.00513
	rs4373175	4	127847693	G	A	INTU	-0.0784	4.802e-08	AlL-AlR		0.3562	-0.0707277	0.0253547	0.005316		0.3613	-0.100001	0.044934	0.02629		0.3696	-0.0819248	0.0236163	0.0005282		0.3481	-0.0735236	0.0316532	0.02029
	rs2893204	4	127848237	C	G	INTU	-0.0828	3.807e-09	Prn-AlL		0.3734	-0.0624447	0.0240756	0.009548		0.3787	-0.0517675	0.0456787	0.2575		0.3849	-0.112611	0.0233682	1.499e-06		0.3677	-0.0781975	0.0311259	0.01207
	rs2893204	4	127848237	C	G	INTU	-0.0781	3.192e-08	Prn-AlR		0.3734	-0.056695	0.0242711	0.01953		0.3787	-0.00983965	0.0461121	0.8311		0.3849	-0.11544	0.0234729	9.111e-07		0.3677	-0.0787242	0.0311221	0.01148
	rs2391120	4	127848312	G	A	INTU	-0.0806	1.33e-08	Prn-AlL		0.3562	-0.0522134	0.0243738	0.03229		0.3613	-0.0652067	0.0452857	0.1502		0.3696	-0.113997	0.0235725	1.377e-06		0.3481	-0.0759799	0.0317172	0.0167
	rs2391120	4	127848312	G	A	INTU	-0.0815	1.09e-08	Prn-AlR		0.3562	-0.0459565	0.0245643	0.0615		0.3613	-0.0258117	0.0457139	0.5724		0.3696	-0.125444	0.0236731	1.235e-07		0.3481	-0.0888601	0.0317103	0.00513
	rs2391120	4	127848312	G	A	INTU	-0.0784	4.802e-08	AlL-AlR		0.3562	-0.0707277	0.0253547	0.005316		0.3613	-0.100001	0.044934	0.02629		0.3696	-0.0819248	0.0236163	0.0005282		0.3481	-0.0735236	0.0316532	0.02029
	rs113220648	4	127848946	T	C	INTU	-0.0809	1.223e-08	Prn-AlL		0.3551	-0.0519114	0.0243776	0.03324		0.3598	-0.0657404	0.0453924	0.148		0.3688	-0.113205	0.0235942	1.668e-06		0.3459	-0.0789895	0.0317225	0.01284
	rs113220648	4	127848946	T	C	INTU	-0.0809	1.436e-08	Prn-AlR		0.3551	-0.0445788	0.0245714	0.06973		0.3598	-0.0288022	0.0458334	0.5298		0.3688	-0.12472	0.023702	1.504e-07		0.3459	-0.0880724	0.0317208	0.005551
	rs113220648	4	127848946	T	C	INTU	-0.0801	2.545e-08	AlL-AlR		0.3551	-0.0696337	0.0253618	0.00608		0.3598	-0.103514	0.0450551	0.02175		0.3688	-0.0825291	0.0236405	0.0004865		0.3459	-0.0805379	0.0316532	0.011
	rs11732135	4	127856015	G	T	INTU	-0.081	1.124e-08	Prn-AlL		0.3567	-0.0536103	0.0243889	0.02804		0.3619	-0.0643819	0.0450965	0.1536		0.3696	-0.113997	0.0235725	1.377e-06		0.3481	-0.0759799	0.0317172	0.0167
	rs11732135	4	127856015	G	T	INTU	-0.0817	1.008e-08	Prn-AlR		0.3567	-0.0468396	0.0245819	0.05672		0.3619	-0.0248599	0.0455148	0.585		0.3696	-0.125444	0.0236731	1.235e-07		0.3481	-0.0888601	0.0317103	0.00513
	rs11732135	4	127856015	G	T	INTU	-0.0789	3.943e-08	AlL-AlR		0.3567	-0.0708336	0.0253723	0.005271		0.3619	-0.10424	0.0447725	0.02015		0.3696	-0.0819248	0.0236163	0.0005282		0.3481	-0.0735236	0.0316532	0.02029
	rs5011815	4	127856273	G	T	INTU	-0.0811	1.158e-08	Prn-AlL		0.3555	-0.053346	0.0243927	0.02888		0.3584	-0.0622472	0.0454603	0.1711		0.3688	-0.113205	0.0235942	1.668e-06		0.3459	-0.0789895	0.0317225	0.01284
	rs5011815	4	127856273	G	T	INTU	-0.0811	1.361e-08	Prn-AlR		0.3555	-0.0454973	0.024589	0.06443		0.3584	-0.0269147	0.0459529	0.5581		0.3688	-0.12472	0.023702	1.504e-07		0.3459	-0.0880724	0.0317208	0.005551
	rs5011815	4	127856273	G	T	INTU	-0.0802	2.522e-08	AlL-AlR		0.3555	-0.0697395	0.0253794	0.00603		0.3584	-0.103756	0.0451358	0.0218		0.3688	-0.0825291	0.0236405	0.0004865		0.3459	-0.0805379	0.0316532	0.011
	rs2391117	4	127857480	C	T	INTU	-0.0836	2.608e-09	Prn-AlL		0.3743	-0.0652762	0.0240416	0.006664		0.3793	-0.0513309	0.0457466	0.2622		0.385	-0.112281	0.0233773	1.624e-06		0.3675	-0.0785143	0.0311153	0.01171
	rs2391117	4	127857480	C	T	INTU	-0.0786	2.607e-08	Prn-AlR		0.3743	-0.0582139	0.0242393	0.01639		0.3793	-0.00937375	0.0461918	0.8392		0.385	-0.114913	0.0234757	1.024e-06		0.3675	-0.0796695	0.0311115	0.01052
	rs6813695	4	127857731	G	A	INTU	-0.0817	8.693e-09	Prn-AlL		0.3568	-0.0546674	0.0243851	0.02507		0.3618	-0.0651097	0.0453099	0.1509		0.3699	-0.113931	0.0235783	1.409e-06		0.3497	-0.0770887	0.0316644	0.01497
	rs6813695	4	127857731	G	A	INTU	-0.0817	1.038e-08	Prn-AlR		0.3568	-0.0473341	0.0245784	0.05421		0.3618	-0.0243025	0.0457139	0.5952		0.3699	-0.124391	0.0236799	1.582e-07		0.3497	-0.0897004	0.0316577	0.004649
	rs6813695	4	127857731	G	A	INTU	-0.0787	4.372e-08	AlL-AlR		0.3568	-0.0698807	0.0253723	0.005918		0.3618	-0.101778	0.0449743	0.02384		0.3699	-0.0817522	0.023621	0.0005434		0.3497	-0.0754673	0.0316025	0.01701
	rs17274880	4	127860359	C	G	INTU	-0.0815	9.654e-09	Prn-AlL		0.3566	-0.0547807	0.0243814	0.02467		0.3635	-0.0631205	0.0454167	0.1648		0.3689	-0.112875	0.0236041	1.803e-06		0.3459	-0.0789895	0.0317225	0.01284
	rs17274880	4	127860359	C	G	INTU	-0.0808	1.541e-08	Prn-AlR		0.3566	-0.0441196	0.0245749	0.07281		0.3635	-0.0305304	0.045913	0.5064		0.3689	-0.124193	0.023701	1.696e-07		0.3459	-0.0880724	0.0317208	0.005551
	rs17274880	4	127860359	C	G	INTU	-0.0811	1.696e-08	AlL-AlR		0.3566	-0.0730924	0.0253653	0.003988		0.3635	-0.104927	0.0451358	0.02035		0.3689	-0.0819248	0.0236367	0.0005336		0.3459	-0.0805379	0.0316532	0.011
	rs7654524	4	127860730	T	C	INTU	-0.0813	1.024e-08	Prn-AlL		0.3566	-0.0547052	0.0243814	0.02493		0.3615	-0.0637512	0.0453148	0.1598		0.3697	-0.113667	0.0235774	1.489e-06		0.3479	-0.0762967	0.031712	0.0162
	rs7654524	4	127860730	T	C	INTU	-0.0821	8.578e-09	Prn-AlR		0.3566	-0.0480053	0.0245749	0.05088		0.3615	-0.0247126	0.0457538	0.5891		0.3697	-0.124917	0.0236765	1.394e-07		0.3479	-0.0898055	0.031705	0.004654
	rs9307592	4	127861279	C	T	INTU	-0.0813	1.024e-08	Prn-AlL		0.3566	-0.0547052	0.0243814	0.02493		0.3615	-0.0637512	0.0453148	0.1598		0.3697	-0.113667	0.0235774	1.489e-06		0.3479	-0.0762967	0.031712	0.0162
	rs9307592	4	127861279	C	T	INTU	-0.0821	8.578e-09	Prn-AlR		0.3566	-0.0480053	0.0245749	0.05088		0.3615	-0.0247126	0.0457538	0.5891		0.3697	-0.124917	0.0236765	1.394e-07		0.3479	-0.0898055	0.031705	0.004654
	rs1510694	4	127862511	T	C	INTU	-0.0811	1.145e-08	Prn-AlL		0.3557	-0.0547052	0.0243965	0.02506		0.3603	-0.0671474	0.0453779	0.1392		0.372	-0.112611	0.0236181	1.937e-06		0.347	-0.0756631	0.0316908	0.01705
	rs1510694	4	127862511	T	C	INTU	-0.0822	8.706e-09	Prn-AlR		0.3557	-0.0469102	0.0245925	0.05659		0.3603	-0.0284796	0.0457936	0.5343		0.372	-0.126892	0.0237358	9.546e-08		0.347	-0.0868119	0.031684	0.006209
	rs5861801	4	127862946	C	CA	INTU	-0.0843	1.785e-08	Prn-AlL		0.3603	-0.0567816	0.0244078	0.02001		NA	NA	NA	NA		0.3689	-0.112875	0.0236041	1.803e-06		0.3459	-0.0789895	0.0317225	0.01284
	rs5861801	4	127862946	C	CA	INTU	-0.0873	6.284e-09	Prn-AlR		0.3603	-0.0471222	0.0245996	0.05561		NA	NA	NA	NA		0.3689	-0.124193	0.023701	1.696e-07		0.3459	-0.0880724	0.0317208	0.005551
	rs17209401	4	127865071	A	G	INTU	-0.0811	1.162e-08	Prn-AlL		0.3554	-0.0544409	0.0243889	0.02569		0.3621	-0.0657404	0.0456593	0.1501		0.3688	-0.111819	0.0236155	2.277e-06		0.3471	-0.0784087	0.0317964	0.01377
	rs17209401	4	127865071	A	G	INTU	-0.0806	1.704e-08	Prn-AlR		0.3554	-0.0466276	0.0245819	0.05793		0.3621	-0.0269067	0.0461121	0.5597		0.3688	-0.123009	0.0237194	2.262e-07		0.3471	-0.0868645	0.0317733	0.00631
	rs17209401	4	127865071	A	G	INTU	-0.0799	2.948e-08	AlL-AlR		0.3554	-0.0696337	0.0253759	0.006108		0.3621	-0.106057	0.0452973	0.01946		0.3688	-0.0808026	0.0236541	0.0006424		0.3471	-0.081383	0.0317715	0.01049
	rs17209459	4	127865293	T	C	INTU	-0.0814	9.904e-09	Prn-AlL		0.3554	-0.0544409	0.0243889	0.02569		0.36	-0.0642849	0.0454215	0.1574		0.3689	-0.112677	0.0235973	1.866e-06		0.3459	-0.0789895	0.0317225	0.01284
	rs17209459	4	127865293	T	C	INTU	-0.0813	1.268e-08	Prn-AlR		0.3554	-0.0466276	0.0245819	0.05793		0.36	-0.0277111	0.0458732	0.5458		0.3689	-0.12393	0.0237005	1.798e-07		0.3459	-0.0880724	0.0317208	0.005551
	rs17209459	4	127865293	T	C	INTU	-0.0797	3.057e-08	AlL-AlR		0.3554	-0.0696337	0.0253759	0.006108		0.36	-0.102302	0.0450955	0.02342		0.3689	-0.0816658	0.023637	0.0005572		0.3459	-0.0805379	0.0316532	0.011
	rs13107341	4	127867187	A	G	INTU	-0.0813	1.006e-08	Prn-AlL		0.3565	-0.0547052	0.0243814	0.02493		0.3616	-0.0654978	0.0453633	0.1491		0.3698	-0.113469	0.0235706	1.541e-06		0.3481	-0.0759799	0.0317172	0.0167
	rs13107341	4	127867187	A	G	INTU	-0.082	8.942e-09	Prn-AlR		0.3565	-0.0480053	0.0245749	0.05088		0.3616	-0.026628	0.0457936	0.5611		0.3698	-0.124654	0.023676	1.478e-07		0.3481	-0.0888601	0.0317103	0.00513
	rs4833361	4	127870060	A	G	INTU	-0.082	8.031e-09	Prn-AlL		0.3565	-0.0547052	0.0243814	0.02493		0.3608	-0.0705921	0.0452032	0.1187		0.3701	-0.114656	0.0236795	1.337e-06		0.348	-0.0752935	0.0317806	0.0179
	rs4833361	4	127870060	A	G	INTU	-0.0828	6.742e-09	Prn-AlR		0.3565	-0.0480053	0.0245749	0.05088		0.3608	-0.0270341	0.0457936	0.555		0.3701	-0.127813	0.0237615	7.943e-08		0.348	-0.0874947	0.0317208	0.005845
	rs10012049	4	127873005	C	T	INTU	-0.0822	7.605e-09	Prn-AlL		0.3559	-0.055196	0.0244078	0.02375		0.3609	-0.070398	0.0452323	0.1198		0.3702	-0.114722	0.0236882	1.33e-06		0.3479	-0.0751879	0.0317489	0.01793
	rs10012049	4	127873005	C	T	INTU	-0.0821	9.058e-09	Prn-AlR		0.3559	-0.0457092	0.0245961	0.06325		0.3609	-0.026624	0.0457936	0.5612		0.3702	-0.127879	0.0237605	7.828e-08		0.3479	-0.0877573	0.0316735	0.005652
	rs6534593	4	127873893	A	G	INTU	-0.082	8.131e-09	Prn-AlL		0.3559	-0.055196	0.0244078	0.02375		0.3615	-0.0704466	0.0452954	0.1202		0.3702	-0.114722	0.0236882	1.33e-06		0.3469	-0.0743958	0.0317436	0.01915
	rs6534593	4	127873893	A	G	INTU	-0.0821	9.262e-09	Prn-AlR		0.3559	-0.0457092	0.0245961	0.06325		0.3615	-0.0265842	0.0459529	0.5631		0.3702	-0.127879	0.0237605	7.828e-08		0.3469	-0.0874947	0.031684	0.005791
	rs13142376	4	127877273	G	C	INTU	-0.0854	1.363e-09	Prn-AlL		0.374	-0.0668241	0.0241133	0.005614		0.3789	-0.0529805	0.0458048	0.2475		0.3858	-0.115448	0.0235128	9.521e-07		0.3679	-0.0785143	0.0311047	0.01167
	rs13142376	4	127877273	G	C	INTU	-0.0793	2.121e-08	Prn-AlR		0.374	-0.0569069	0.02431	0.01929		0.3789	-0.0111219	0.0464307	0.8107		0.3858	-0.117941	0.0236023	6.09e-07		0.3679	-0.079512	0.0310485	0.01051
	rs4833363	4	127882932	G	A	INTU	-0.0826	6.792e-09	Prn-AlL		0.3554	-0.0573479	0.0244304	0.01897		0.3589	-0.0667593	0.0454895	0.1427		0.3687	-0.114194	0.0237213	1.54e-06		0.3442	-0.0762967	0.0317964	0.01649
	rs4833363	4	127882932	G	A	INTU	-0.0819	1.049e-08	Prn-AlR		0.3554	-0.0462038	0.0246208	0.06071		0.3589	-0.0312312	0.0460723	0.4981		0.3687	-0.12755	0.0238011	8.871e-08		0.3442	-0.084186	0.0317208	0.008023
	rs4833363	4	127882932	G	A	INTU	-0.0801	2.978e-08	AlL-AlR		0.3554	-0.0718218	0.0254288	0.004771		0.3589	-0.107672	0.0454992	0.01816		0.3687	-0.0818817	0.0237683	0.0005766		0.3442	-0.0762279	0.0317334	0.01639
	rs62324478	4	127895340	T	C	INTU	-0.0853	1.748e-09	Prn-AlL		0.3812	-0.0601417	0.0243474	0.01355		0.3808	-0.0699129	0.0452711	0.1227		0.3924	-0.113535	0.023658	1.656e-06		0.3697	-0.0846391	0.0312684	0.006843
	rs62324478	4	127895340	T	C	INTU	-0.0844	2.98e-09	Prn-AlR		0.3812	-0.0407285	0.0245396	0.09712		0.3808	-0.0361053	0.0458732	0.4315		0.3924	-0.134526	0.0237218	1.532e-08		0.3697	-0.0906457	0.0311956	0.003706
	rs62324479	4	127901582	G	A	INTU	-0.086	1.269e-09	Prn-AlL		0.3815	-0.0591224	0.0243096	0.01505		0.383	-0.0796648	0.0455428	0.08049		0.3926	-0.113997	0.0236556	1.499e-06		0.3696	-0.0844807	0.0312526	0.006932
	rs62324479	4	127901582	G	A	INTU	-0.0847	2.641e-09	Prn-AlR		0.3815	-0.0393156	0.0245042	0.1088		0.383	-0.0429265	0.046152	0.3529		0.3926	-0.134987	0.0237152	1.35e-08		0.3696	-0.0902256	0.0311851	0.003861
	rs62324480	4	127904044	C	T	INTU	-0.0867	5.733e-09	Prn-AlL		0.3845	-0.0593489	0.024219	0.01433		NA	NA	NA	NA		0.3926	-0.113997	0.0236556	1.499e-06		0.3696	-0.0844807	0.0312526	0.006932
	rs62324480	4	127904044	C	T	INTU	-0.0881	3.618e-09	Prn-AlR		0.3845	-0.0371608	0.0244124	0.1282		NA	NA	NA	NA		0.3926	-0.134987	0.0237152	1.35e-08		0.3696	-0.0902256	0.0311851	0.003861
	rs62324481	4	127904903	C	T	INTU	-0.086	1.22e-09	Prn-AlL		0.3821	-0.0599529	0.0242945	0.01363		0.3814	-0.0667108	0.0453391	0.1415		0.3926	-0.113997	0.0236556	1.499e-06		0.3714	-0.0894968	0.0312473	0.004225
	rs62324481	4	127904903	C	T	INTU	-0.0847	2.522e-09	Prn-AlR		0.3821	-0.0394215	0.0244901	0.1075		0.3814	-0.036603	0.0459927	0.4263		0.3926	-0.134987	0.0237152	1.35e-08		0.3714	-0.0934817	0.0311851	0.002755
	rs62324481	4	127904903	C	T	INTU	-0.0787	4.16e-08	AlL-AlR		0.3821	-0.0651514	0.0253123	0.01011		0.3814	-0.106178	0.0452973	0.01922		0.3926	-0.0828313	0.0236932	0.0004777		0.3714	-0.0789745	0.0311757	0.01136
	rs62324074	4	127905009	C	T	INTU	-0.089	2.316e-09	Prn-AlL		0.3799	-0.0615764	0.0243172	0.01138		NA	NA	NA	NA		0.3928	-0.114788	0.0236628	1.278e-06		0.3714	-0.0894968	0.0312473	0.004225
	rs62324074	4	127905009	C	T	INTU	-0.0901	1.713e-09	Prn-AlR		0.3799	-0.0403046	0.0245113	0.1002		NA	NA	NA	NA		0.3928	-0.134987	0.0237528	1.425e-08		0.3714	-0.0934817	0.0311851	0.002755
	rs62324075	4	127906214	G	A	INTU	-0.086	1.22e-09	Prn-AlL		0.3819	-0.0599529	0.0242945	0.01363		0.3814	-0.0667108	0.0453391	0.1415		0.3926	-0.113997	0.0236556	1.499e-06		0.3714	-0.0894968	0.0312473	0.004225
	rs62324075	4	127906214	G	A	INTU	-0.0847	2.522e-09	Prn-AlR		0.3819	-0.0394215	0.0244901	0.1075		0.3814	-0.036603	0.0459927	0.4263		0.3926	-0.134987	0.0237152	1.35e-08		0.3714	-0.0934817	0.0311851	0.002755
	rs62324075	4	127906214	G	A	INTU	-0.0787	4.16e-08	AlL-AlR		0.3819	-0.0651514	0.0253123	0.01011		0.3814	-0.106178	0.0452973	0.01922		0.3926	-0.0828313	0.0236932	0.0004777		0.3714	-0.0789745	0.0311757	0.01136
	rs72678027	4	127906653	G	T	INTU	-0.086	1.22e-09	Prn-AlL		0.382	-0.0599529	0.0242945	0.01363		0.3814	-0.0667108	0.0453391	0.1415		0.3926	-0.113997	0.0236556	1.499e-06		0.3714	-0.0894968	0.0312473	0.004225
	rs72678027	4	127906653	G	T	INTU	-0.0847	2.522e-09	Prn-AlR		0.382	-0.0394215	0.0244901	0.1075		0.3814	-0.036603	0.0459927	0.4263		0.3926	-0.134987	0.0237152	1.35e-08		0.3714	-0.0934817	0.0311851	0.002755
	rs72678027	4	127906653	G	T	INTU	-0.0787	4.16e-08	AlL-AlR		0.382	-0.0651514	0.0253123	0.01011		0.3814	-0.106178	0.0452973	0.01922		0.3926	-0.0828313	0.0236932	0.0004777		0.3714	-0.0789745	0.0311757	0.01136
	rs138362449	4	127907273	AT	A	INTU	-0.0886	2.734e-09	Prn-AlL		0.3841	-0.0620672	0.024287	0.01065		NA	NA	NA	NA		0.3926	-0.113997	0.0236556	1.499e-06		0.368	-0.0883352	0.031316	0.004834
	rs138362449	4	127907273	AT	A	INTU	-0.0897	2.043e-09	Prn-AlR		0.3841	-0.0397041	0.0244795	0.1051		NA	NA	NA	NA		0.3926	-0.134987	0.0237152	1.35e-08		0.368	-0.0925364	0.0313216	0.003163
	rs62322859	4	127907477	G	T	INTU	-0.086	1.22e-09	Prn-AlL		0.3819	-0.0599529	0.0242945	0.01363		0.3814	-0.0667108	0.0453391	0.1415		0.3926	-0.113997	0.0236556	1.499e-06		0.3714	-0.0894968	0.0312473	0.004225
	rs62322859	4	127907477	G	T	INTU	-0.0847	2.522e-09	Prn-AlR		0.3819	-0.0394215	0.0244901	0.1075		0.3814	-0.036603	0.0459927	0.4263		0.3926	-0.134987	0.0237152	1.35e-08		0.3714	-0.0934817	0.0311851	0.002755
	rs62322859	4	127907477	G	T	INTU	-0.0787	4.16e-08	AlL-AlR		0.3819	-0.0651514	0.0253123	0.01011		0.3814	-0.106178	0.0452973	0.01922		0.3926	-0.0828313	0.0236932	0.0004777		0.3714	-0.0789745	0.0311757	0.01136
	rs12500948	4	127909227	A	G	INTU	-0.0852	1.758e-09	Prn-AlL		0.3812	-0.0591224	0.0243096	0.01505		0.3809	-0.0723872	0.045373	0.111		0.3926	-0.113997	0.0236556	1.499e-06		0.3695	-0.0841639	0.0312473	0.007115
	rs12500948	4	127909227	A	G	INTU	-0.0841	3.293e-09	Prn-AlR		0.3812	-0.0393156	0.0245042	0.1088		0.3809	-0.0381918	0.0459927	0.4064		0.3926	-0.134987	0.0237152	1.35e-08		0.3695	-0.0899105	0.0311798	0.003963
	rs62324061	4	127909866	C	T	INTU	-0.0852	1.738e-09	Prn-AlL		0.3812	-0.0591224	0.0243096	0.01505		0.3809	-0.0723872	0.045373	0.111		0.3924	-0.113799	0.0236391	1.538e-06		0.3696	-0.0844807	0.0312526	0.006932
	rs62324061	4	127909866	C	T	INTU	-0.0841	3.329e-09	Prn-AlR		0.3812	-0.0393156	0.0245042	0.1088		0.3809	-0.0381918	0.0459927	0.4064		0.3924	-0.134592	0.0236958	1.455e-08		0.3696	-0.0902256	0.0311851	0.003861
	rs72678030	4	127911674	G	A	INTU	-0.0852	1.738e-09	Prn-AlL		0.3812	-0.0591224	0.0243096	0.01505		0.3809	-0.0723872	0.045373	0.111		0.3924	-0.113799	0.0236391	1.538e-06		0.3696	-0.0844807	0.0312526	0.006932
	rs72678030	4	127911674	G	A	INTU	-0.0841	3.329e-09	Prn-AlR		0.3812	-0.0393156	0.0245042	0.1088		0.3809	-0.0381918	0.0459927	0.4064		0.3924	-0.134592	0.0236958	1.455e-08		0.3696	-0.0902256	0.0311851	0.003861
	rs62324062	4	127912587	G	C	INTU	-0.0852	1.738e-09	Prn-AlL		0.3812	-0.0591224	0.0243096	0.01505		0.3809	-0.0723872	0.045373	0.111		0.3924	-0.113799	0.0236391	1.538e-06		0.3696	-0.0844807	0.0312526	0.006932
	rs62324062	4	127912587	G	C	INTU	-0.0841	3.329e-09	Prn-AlR		0.3812	-0.0393156	0.0245042	0.1088		0.3809	-0.0381918	0.0459927	0.4064		0.3924	-0.134592	0.0236958	1.455e-08		0.3696	-0.0902256	0.0311851	0.003861
	rs17276043	4	127917170	A	G	INTU	-0.0846	2.277e-09	Prn-AlL		0.381	-0.0595377	0.0243285	0.01446		0.3801	-0.0695733	0.0454798	0.1263		0.3923	-0.113865	0.0236479	1.528e-06		0.3699	-0.0821575	0.031242	0.008631
	rs17276043	4	127917170	A	G	INTU	-0.0836	4.211e-09	Prn-AlR		0.381	-0.0389623	0.0245219	0.1121		0.3801	-0.0387573	0.0461121	0.4008		0.3923	-0.134066	0.0237116	1.691e-08		0.3699	-0.0889127	0.0311588	0.004365
	rs56093833	4	127920018	G	A	INTU	-0.0853	1.65e-09	Prn-AlL		0.381	-0.0595377	0.0243285	0.01446		0.3807	-0.0727268	0.0453245	0.109		0.3924	-0.113799	0.0236391	1.538e-06		0.3705	-0.0841111	0.0312104	0.007078
	rs56093833	4	127920018	G	A	INTU	-0.0842	3.179e-09	Prn-AlR		0.381	-0.0389623	0.0245219	0.1121		0.3807	-0.0373277	0.045913	0.4166		0.3924	-0.134592	0.0236958	1.455e-08		0.3705	-0.0917486	0.0311956	0.003312
	rs56093833	4	127920018	G	A	INTU	-0.0782	4.871e-08	AlL-AlR		0.381	-0.0653632	0.0253441	0.009944		0.3807	-0.103433	0.0452569	0.02254		0.3924	-0.0826154	0.0236653	0.0004869		0.3705	-0.0780448	0.0310743	0.01207
	rs60300026	4	127920877	A	T	INTU	-0.0866	1.027e-09	Prn-AlL		0.3715	-0.0617651	0.024404	0.01144		0.3768	-0.0647701	0.0454021	0.154		0.3878	-0.118614	0.0236472	5.528e-07		0.363	-0.0817879	0.031374	0.009215
	rs60300026	4	127920877	A	T	INTU	-0.0859	1.698e-09	Prn-AlR		0.3715	-0.0442609	0.0245961	0.07201		0.3768	-0.029945	0.0459529	0.5146		0.3878	-0.136172	0.0237109	1.005e-08		0.363	-0.0915385	0.0313531	0.003536
	rs60300026	4	127920877	A	T	INTU	-0.0791	3.739e-08	AlL-AlR		0.3715	-0.0649749	0.0254182	0.01064		0.3768	-0.0992342	0.0453377	0.02886		0.3878	-0.0832197	0.0236891	0.0004492		0.363	-0.0836225	0.0312264	0.007459
	rs56282541	4	127922601	T	C	INTU	-0.0866	1.027e-09	Prn-AlL		0.3715	-0.0617651	0.024404	0.01144		0.3768	-0.0647701	0.0454021	0.154		0.3878	-0.118614	0.0236472	5.528e-07		0.363	-0.0817879	0.031374	0.009215
	rs56282541	4	127922601	T	C	INTU	-0.0859	1.698e-09	Prn-AlR		0.3715	-0.0442609	0.0245961	0.07201		0.3768	-0.029945	0.0459529	0.5146		0.3878	-0.136172	0.0237109	1.005e-08		0.363	-0.0915385	0.0313531	0.003536
	rs56282541	4	127922601	T	C	INTU	-0.0791	3.739e-08	AlL-AlR		0.3715	-0.0649749	0.0254182	0.01064		0.3768	-0.0992342	0.0453377	0.02886		0.3878	-0.0832197	0.0236891	0.0004492		0.363	-0.0836225	0.0312264	0.007459
	rs17210317	4	127923157	C	A	INTU	-0.0866	1.027e-09	Prn-AlL		0.3715	-0.0617651	0.024404	0.01144		0.3768	-0.0647701	0.0454021	0.154		0.3878	-0.118614	0.0236472	5.528e-07		0.363	-0.0817879	0.031374	0.009215
	rs17210317	4	127923157	C	A	INTU	-0.0859	1.698e-09	Prn-AlR		0.3715	-0.0442609	0.0245961	0.07201		0.3768	-0.029945	0.0459529	0.5146		0.3878	-0.136172	0.0237109	1.005e-08		0.363	-0.0915385	0.0313531	0.003536
	rs17210317	4	127923157	C	A	INTU	-0.0791	3.739e-08	AlL-AlR		0.3715	-0.0649749	0.0254182	0.01064		0.3768	-0.0992342	0.0453377	0.02886		0.3878	-0.0832197	0.0236891	0.0004492		0.363	-0.0836225	0.0312264	0.007459
	rs17210366	4	127923509	A	C	INTU	-0.0865	1.055e-09	Prn-AlL		0.3715	-0.0617651	0.024404	0.01144		0.3768	-0.0647701	0.0454021	0.154		0.3878	-0.118614	0.0236472	5.528e-07		0.3629	-0.0814711	0.0313688	0.009464
	rs17210366	4	127923509	A	C	INTU	-0.0858	1.733e-09	Prn-AlR		0.3715	-0.0442609	0.0245961	0.07201		0.3768	-0.029945	0.0459529	0.5146		0.3878	-0.136172	0.0237109	1.005e-08		0.3629	-0.0913285	0.0313584	0.003619
	rs17210366	4	127923509	A	C	INTU	-0.079	3.806e-08	AlL-AlR		0.3715	-0.0649749	0.0254182	0.01064		0.3768	-0.0992342	0.0453377	0.02886		0.3878	-0.0832197	0.0236891	0.0004492		0.3629	-0.0834112	0.0312264	0.007618
	rs62324067	4	127924075	C	T	INTU	-0.0866	1.027e-09	Prn-AlL		0.3715	-0.0617651	0.024404	0.01144		0.3768	-0.0647701	0.0454021	0.154		0.3878	-0.118614	0.0236472	5.528e-07		0.363	-0.0817879	0.031374	0.009215
	rs62324067	4	127924075	C	T	INTU	-0.0859	1.698e-09	Prn-AlR		0.3715	-0.0442609	0.0245961	0.07201		0.3768	-0.029945	0.0459529	0.5146		0.3878	-0.136172	0.0237109	1.005e-08		0.363	-0.0915385	0.0313531	0.003536
	rs62324067	4	127924075	C	T	INTU	-0.0791	3.739e-08	AlL-AlR		0.3715	-0.0649749	0.0254182	0.01064		0.3768	-0.0992342	0.0453377	0.02886		0.3878	-0.0832197	0.0236891	0.0004492		0.363	-0.0836225	0.0312264	0.007459
	rs4834160	4	127924880	A	G	INTU	-0.0867	1.003e-09	Prn-AlL		0.3715	-0.0617651	0.024404	0.01144		0.3768	-0.0647701	0.0454021	0.154		0.3878	-0.118746	0.0236452	5.352e-07		0.363	-0.0817879	0.031374	0.009215
	rs4834160	4	127924880	A	G	INTU	-0.0859	1.687e-09	Prn-AlR		0.3715	-0.0442609	0.0245961	0.07201		0.3768	-0.029945	0.0459529	0.5146		0.3878	-0.136237	0.0237141	9.943e-09		0.363	-0.0915385	0.0313531	0.003536
	rs4834160	4	127924880	A	G	INTU	-0.0791	3.764e-08	AlL-AlR		0.3715	-0.0649749	0.0254182	0.01064		0.3768	-0.0992342	0.0453377	0.02886		0.3878	-0.0831334	0.023678	0.0004526		0.363	-0.0836225	0.0312264	0.007459
	rs56049331	4	127926515	G	A	INTU	-0.0869	9.216e-10	Prn-AlL		0.3715	-0.0617651	0.024404	0.01144		0.3768	-0.0647701	0.0454021	0.154		0.3877	-0.118482	0.0236445	5.673e-07		0.3627	-0.0833191	0.0314268	0.008083
	rs56049331	4	127926515	G	A	INTU	-0.086	1.616e-09	Prn-AlR		0.3715	-0.0442609	0.0245961	0.07201		0.3768	-0.029945	0.0459529	0.5146		0.3877	-0.135908	0.0237105	1.07e-08		0.3627	-0.0927465	0.0314162	0.003194
	rs56049331	4	127926515	G	A	INTU	-0.0793	3.448e-08	AlL-AlR		0.3715	-0.0649749	0.0254182	0.01064		0.3768	-0.0992342	0.0453377	0.02886		0.3877	-0.0831334	0.0236645	0.0004491		0.3627	-0.0846789	0.0312602	0.006807
	rs62324069	4	127928162	T	A	INTU	-0.084	3.594e-09	Prn-AlL		0.3702	-0.0610856	0.0244418	0.01252		0.3737	-0.0667593	0.0457757	0.145		0.3831	-0.115778	0.0236571	1.03e-06		0.3604	-0.0737094	0.0316064	0.01976
	rs62324069	4	127928162	T	A	INTU	-0.0835	5.189e-09	Prn-AlR		0.3702	-0.0433778	0.0246349	0.07826		0.3737	-0.0329714	0.0463511	0.4769		0.3831	-0.135974	0.0237344	1.094e-08		0.3604	-0.0800897	0.0315842	0.01131
	rs62324069	4	127928162	T	A	INTU	-0.0801	2.719e-08	AlL-AlR		0.3702	-0.0644102	0.02545	0.01144		0.3737	-0.109489	0.045701	0.01677		0.3831	-0.0839535	0.0236889	0.0003987		0.3604	-0.0832845	0.031425	0.008106
	rs2391121	4	127928833	T	A	INTU	-0.0839	3.674e-09	Prn-AlL		0.3702	-0.0610856	0.0244418	0.01252		0.3738	-0.0667593	0.0457757	0.145		0.3831	-0.115778	0.0236571	1.03e-06		0.3605	-0.0734454	0.0316011	0.0202
	rs2391121	4	127928833	T	A	INTU	-0.0834	5.541e-09	Prn-AlR		0.3702	-0.0433778	0.0246349	0.07826		0.3738	-0.0329714	0.0463511	0.4769		0.3831	-0.135974	0.0237344	1.094e-08		0.3605	-0.0793019	0.0315737	0.01207
	rs2391121	4	127928833	T	A	INTU	-0.0802	2.583e-08	AlL-AlR		0.3702	-0.0644102	0.02545	0.01144		0.3738	-0.109489	0.045701	0.01677		0.3831	-0.0839535	0.0236889	0.0003987		0.3605	-0.083876	0.0314165	0.007639
	rs35382815	4	127929957	T	TA	INTU	-0.0827	6.506e-09	Prn-AlL		0.3609	-0.0582163	0.0244795	0.01747		0.3693	-0.0597728	0.0461444	0.1954		0.3831	-0.115778	0.0236571	1.03e-06		0.3603	-0.0752407	0.0316539	0.01755
	rs35382815	4	127929957	T	TA	INTU	-0.0839	4.661e-09	Prn-AlR		0.3609	-0.0454973	0.0246632	0.06512		0.3693	-0.026397	0.0469086	0.5736		0.3831	-0.135974	0.0237344	1.094e-08		0.3603	-0.0808249	0.0316157	0.01065
	rs12512293	4	127930510	T	C	INTU	-0.0839	3.674e-09	Prn-AlL		0.3702	-0.0610856	0.0244418	0.01252		0.3739	-0.0667593	0.0457757	0.145		0.3831	-0.115778	0.0236571	1.03e-06		0.3605	-0.0734454	0.0316011	0.0202
	rs12512293	4	127930510	T	C	INTU	-0.0834	5.541e-09	Prn-AlR		0.3702	-0.0433778	0.0246349	0.07826		0.3739	-0.0329714	0.0463511	0.4769		0.3831	-0.135974	0.0237344	1.094e-08		0.3605	-0.0793019	0.0315737	0.01207
	rs12512293	4	127930510	T	C	INTU	-0.0802	2.583e-08	AlL-AlR		0.3702	-0.0644102	0.02545	0.01144		0.3739	-0.109489	0.045701	0.01677		0.3831	-0.0839535	0.0236889	0.0003987		0.3605	-0.083876	0.0314165	0.007639
	rs62324072	4	127931891	T	C	INTU	-0.0859	1.084e-09	Prn-AlL		0.3867	-0.0711658	0.0241624	0.003251		0.3889	-0.0517675	0.0463045	0.2639		0.3982	-0.11426	0.0234862	1.19e-06		0.3786	-0.0762439	0.0310097	0.01404
	rs62324072	4	127931891	T	C	INTU	-0.0796	1.94e-08	Prn-AlR		0.3867	-0.0530566	0.0243594	0.02945		0.3889	-0.0137938	0.0467095	0.7677		0.3982	-0.124786	0.0235711	1.265e-07		0.3786	-0.0732623	0.0310013	0.01817
	rs17210835	4	127933960	T	C	INTU	-0.0876	4.626e-10	Prn-AlL		0.3869	-0.0715056	0.0241624	0.003106		0.3905	-0.0585599	0.0460765	0.2039		0.3982	-0.11426	0.0234862	1.19e-06		0.3794	-0.0809431	0.0306718	0.008379
	rs17210835	4	127933960	T	C	INTU	-0.0811	9.639e-09	Prn-AlR		0.3869	-0.053975	0.0243629	0.02682		0.3905	-0.0206031	0.04659	0.6583		0.3982	-0.124786	0.0235711	1.265e-07		0.3794	-0.0765184	0.0308175	0.0131
	rs55665999	4	127934708	C	T	INTU	-0.0865	7.943e-10	Prn-AlL		0.3876	-0.0702597	0.0241775	0.003677		0.3919	-0.0600154	0.0461202	0.1933		0.3989	-0.115646	0.0234385	8.4e-07		0.3809	-0.0742374	0.0308883	0.01632
	rs55665999	4	127934708	C	T	INTU	-0.0804	1.3e-08	Prn-AlR		0.3876	-0.0534098	0.0243735	0.02853		0.3919	-0.0204518	0.04659	0.6607		0.3989	-0.127023	0.0235316	7.157e-08		0.3809	-0.0699012	0.0308857	0.02371
	rs55926587	4	127935299	T	G	INTU	-0.0867	7.729e-10	Prn-AlL		0.3869	-0.0715056	0.0241624	0.003106		0.3905	-0.0585599	0.0460765	0.2039		0.3982	-0.11426	0.0234862	1.19e-06		0.3786	-0.0762439	0.0310097	0.01404
	rs55926587	4	127935299	T	G	INTU	-0.0805	1.326e-08	Prn-AlR		0.3869	-0.053975	0.0243629	0.02682		0.3905	-0.0206031	0.04659	0.6583		0.3982	-0.124786	0.0235711	1.265e-07		0.3786	-0.0732623	0.0310013	0.01817
	rs201415765	4	127935495	TTAAA	T	INTU	-0.089	1.885e-08	Prn-AlL		0.387	-0.0714678	0.0241662	0.003132		0.3916	-0.0550182	0.0461638	0.2337		0.3982	-0.11426	0.0234862	1.19e-06		NA	NA	NA	NA
	rs1510681	4	127939547	T	A	INTU	-0.0863	8.846e-10	Prn-AlL		0.3868	-0.0704485	0.0241699	0.003586		0.3906	-0.0585599	0.0460765	0.2039		0.3984	-0.11426	0.0234573	1.159e-06		0.3786	-0.0762439	0.0310097	0.01404
	rs1510681	4	127939547	T	A	INTU	-0.0803	1.414e-08	Prn-AlR		0.3868	-0.0529506	0.0243665	0.0298		0.3906	-0.0206031	0.04659	0.6583		0.3984	-0.12518	0.0235523	1.13e-07		0.3786	-0.0732623	0.0310013	0.01817
	rs1983212	4	127939721	C	T	INTU	-0.0866	7.984e-10	Prn-AlL		0.3868	-0.0704485	0.0241699	0.003586		0.3908	-0.0585599	0.0460765	0.2039		0.3986	-0.114656	0.0234663	1.075e-06		0.3799	-0.0767719	0.031015	0.01338
	rs1983212	4	127939721	C	T	INTU	-0.0804	1.362e-08	Prn-AlR		0.3868	-0.0529506	0.0243665	0.0298		0.3908	-0.0206031	0.04659	0.6583		0.3986	-0.125312	0.0235416	1.08e-07		0.3799	-0.0734199	0.031038	0.01809
	rs4834163	4	127940319	G	A	INTU	-0.0867	7.519e-10	Prn-AlL		0.3868	-0.0704485	0.0241699	0.003586		0.3911	-0.0609858	0.0460474	0.1857		0.3988	-0.114524	0.0234393	1.075e-06		0.3786	-0.0762439	0.0310097	0.01404
	rs4834163	4	127940319	G	A	INTU	-0.0804	1.329e-08	Prn-AlR		0.3868	-0.0529506	0.0243665	0.0298		0.3911	-0.0226539	0.0465103	0.6263		0.3988	-0.124983	0.0235373	1.161e-07		0.3786	-0.0732623	0.0310013	0.01817
	rs112957550	4	127941667	C	A	INTU	-0.0879	4.279e-10	Prn-AlL		0.3868	-0.0707883	0.0241548	0.003414		0.3914	-0.0653038	0.0461444	0.1572		0.399	-0.116305	0.0234015	6.984e-07		0.3765	-0.0764551	0.03111	0.01408
	rs112957550	4	127941667	C	A	INTU	-0.082	6.996e-09	Prn-AlR		0.3868	-0.0529153	0.0243559	0.02989		0.3914	-0.0281212	0.0464705	0.5453		0.399	-0.127155	0.0235211	6.838e-08		0.3765	-0.0744703	0.0310853	0.0167
	rs111545177	4	127947944	C	T	INTU	-0.0863	5.935e-09	Prn-AlL		0.3737	-0.0647477	0.0248193	0.009107		NA	NA	NA	NA		0.4212	-0.107993	0.0232995	3.688e-06		0.408	-0.0815767	0.0303761	0.007279
	rs111545177	4	127947944	C	T	INTU	-0.0834	2.217e-08	Prn-AlR		0.3737	-0.0410465	0.0250518	0.1014		NA	NA	NA	NA		0.4212	-0.118731	0.023409	4.141e-07		0.408	-0.0860242	0.0303605	0.004659
	rs12504954	4	127948196	A	G	INTU	-0.0886	3.03e-10	Prn-AlL		0.3881	-0.0730535	0.0241813	0.002533		0.3928	-0.0646245	0.0458776	0.1592		0.399	-0.116371	0.0234006	6.904e-07		0.3783	-0.0762967	0.030978	0.01383
	rs12504954	4	127948196	A	G	INTU	-0.0815	8.065e-09	Prn-AlR		0.3881	-0.0520675	0.0243806	0.03282		0.3928	-0.0270779	0.0462316	0.5582		0.399	-0.127352	0.0234968	6.358e-08		0.3783	-0.0738926	0.030975	0.01711
	rs12509027	4	127948337	A	T	INTU	-0.0849	1.677e-09	Prn-AlL		0.3803	-0.0653895	0.0242266	0.006991		0.3891	-0.0608887	0.0463239	0.1889		0.398	-0.11426	0.0234188	1.114e-06		0.3783	-0.0762967	0.030978	0.01383
	rs12509027	4	127948337	A	T	INTU	-0.0816	8.213e-09	Prn-AlR		0.3803	-0.0547168	0.0244159	0.02509		0.3891	-0.0231397	0.0467493	0.6208		0.398	-0.125839	0.0235125	9.245e-08		0.3783	-0.0738926	0.030975	0.01711
	rs34911596	4	127949431	T	C	INTU	-0.0879	4.367e-10	Prn-AlL		0.387	-0.0721852	0.0242001	0.002881		0.3924	-0.0646245	0.0458776	0.1592		0.3978	-0.112941	0.023422	1.48e-06		0.3764	-0.0802039	0.0310044	0.009771
	rs34911596	4	127949431	T	C	INTU	-0.0817	7.762e-09	Prn-AlR		0.387	-0.0511844	0.0244018	0.03601		0.3924	-0.0270779	0.0462316	0.5582		0.3978	-0.125839	0.02353	9.457e-08		0.3764	-0.0788817	0.030996	0.01101
	rs62324102	4	127951371	A	G	INTU	-0.0874	5.349e-10	Prn-AlL		0.387	-0.0721852	0.0242001	0.002881		0.3922	-0.0613254	0.0459164	0.1819		0.3974	-0.112677	0.0234402	1.59e-06		0.3764	-0.0802039	0.0310044	0.009771
	rs62324102	4	127951371	A	G	INTU	-0.0811	9.996e-09	Prn-AlR		0.387	-0.0511844	0.0244018	0.03601		0.3922	-0.0250073	0.0463511	0.5896		0.3974	-0.124786	0.0235445	1.228e-07		0.3764	-0.0788817	0.030996	0.01101
	rs145776672	4	127951413	T	TC	INTU	-0.0874	5.349e-10	Prn-AlL		0.387	-0.0721852	0.0242001	0.002881		0.3922	-0.0613254	0.0459164	0.1819		0.3974	-0.112677	0.0234402	1.59e-06		0.3764	-0.0802039	0.0310044	0.009771
	rs145776672	4	127951413	T	TC	INTU	-0.0811	9.996e-09	Prn-AlR		0.387	-0.0511844	0.0244018	0.03601		0.3922	-0.0250073	0.0463511	0.5896		0.3974	-0.124786	0.0235445	1.228e-07		0.3764	-0.0788817	0.030996	0.01101
	rs62324103	4	127951607	A	G	INTU	-0.0874	5.349e-10	Prn-AlL		0.387	-0.0721852	0.0242001	0.002881		0.3922	-0.0613254	0.0459164	0.1819		0.3974	-0.112677	0.0234402	1.59e-06		0.3764	-0.0802039	0.0310044	0.009771
	rs62324103	4	127951607	A	G	INTU	-0.0811	9.996e-09	Prn-AlR		0.387	-0.0511844	0.0244018	0.03601		0.3922	-0.0250073	0.0463511	0.5896		0.3974	-0.124786	0.0235445	1.228e-07		0.3764	-0.0788817	0.030996	0.01101
	rs4834165	4	127952052	C	A	INTU	-0.0812	5.997e-09	Prn-AlL		0.4114	-0.0632753	0.0239736	0.008366		0.418	-0.0444852	0.046256	0.3364		0.4207	-0.105025	0.0232974	6.739e-06		0.4061	-0.0852727	0.0303867	0.005068
	rs4834165	4	127952052	C	A	INTU	-0.0775	3.401e-08	Prn-AlR		0.4114	-0.041329	0.0241793	0.08739		0.418	-0.028619	0.0467493	0.5405		0.4207	-0.115703	0.0234122	8.098e-07		0.4061	-0.0907508	0.030371	0.002845
	rs62324104	4	127952949	A	G	INTU	-0.0867	7.363e-10	Prn-AlL		0.3856	-0.070826	0.0241813	0.003424		0.3914	-0.0585599	0.0459843	0.2031		0.3974	-0.112677	0.0234402	1.59e-06		0.3764	-0.0802039	0.0310044	0.009771
	rs62324104	4	127952949	A	G	INTU	-0.0803	1.38e-08	Prn-AlR		0.3856	-0.0509018	0.0243841	0.0369		0.3914	-0.0175449	0.0464307	0.7055		0.3974	-0.124786	0.0235445	1.228e-07		0.3764	-0.0788817	0.030996	0.01101
	rs62324105	4	127953147	T	G	INTU	-0.0912	6.482e-10	Prn-AlL		0.3891	-0.0730535	0.0240454	0.002407		NA	NA	NA	NA		0.3952	-0.11459	0.0234192	1.038e-06		0.3764	-0.0802039	0.0310044	0.009771
	rs62324105	4	127953147	T	G	INTU	-0.0857	7.378e-09	Prn-AlR		0.3891	-0.0467336	0.0242534	0.05402		NA	NA	NA	NA		0.3952	-0.126431	0.0235308	8.212e-08		0.3764	-0.0788817	0.030996	0.01101
	rs72678059	4	127953931	G	A	INTU	-0.0873	5.676e-10	Prn-AlL		0.3857	-0.0717699	0.0241888	0.00303		0.3921	-0.0613254	0.0459164	0.1819		0.3974	-0.112677	0.0234402	1.59e-06		0.3764	-0.0802039	0.0310044	0.009771
	rs72678059	4	127953931	G	A	INTU	-0.0811	1.008e-08	Prn-AlR		0.3857	-0.0511138	0.0243877	0.03617		0.3921	-0.0250073	0.0463511	0.5896		0.3974	-0.124786	0.0235445	1.228e-07		0.3764	-0.0788817	0.030996	0.01101
	rs1510663	4	127954490	T	C	INTU	-0.0873	5.739e-10	Prn-AlL		0.3857	-0.0717699	0.0241888	0.00303		0.3921	-0.0613254	0.0459164	0.1819		0.3974	-0.112677	0.0234402	1.59e-06		0.3764	-0.0800983	0.0310097	0.009854
	rs1510663	4	127954490	T	C	INTU	-0.0811	1.019e-08	Prn-AlR		0.3857	-0.0511138	0.0243877	0.03617		0.3921	-0.0250073	0.0463511	0.5896		0.3974	-0.124786	0.0235445	1.228e-07		0.3764	-0.0787767	0.0310065	0.01112
	rs1473018	4	127955342	G	A	INTU	-0.0872	6.061e-10	Prn-AlL		0.3857	-0.0717699	0.0241888	0.00303		0.3921	-0.0609858	0.0459213	0.1843		0.3975	-0.112413	0.0234487	1.702e-06		0.3764	-0.0802039	0.0310044	0.009771
	rs1473018	4	127955342	G	A	INTU	-0.0809	1.088e-08	Prn-AlR		0.3857	-0.0511138	0.0243877	0.03617		0.3921	-0.024836	0.0463511	0.5923		0.3975	-0.124391	0.0235544	1.359e-07		0.3764	-0.0788817	0.030996	0.01101
	rs2136812	4	127955672	A	C	INTU	-0.0872	6.061e-10	Prn-AlL		0.3857	-0.0717699	0.0241888	0.00303		0.3921	-0.0609858	0.0459213	0.1843		0.3975	-0.112413	0.0234487	1.702e-06		0.3764	-0.0802039	0.0310044	0.009771
	rs2136812	4	127955672	A	C	INTU	-0.0809	1.088e-08	Prn-AlR		0.3857	-0.0511138	0.0243877	0.03617		0.3921	-0.024836	0.0463511	0.5923		0.3975	-0.124391	0.0235544	1.359e-07		0.3764	-0.0788817	0.030996	0.01101
	rs12507002	4	127955818	A	G	INTU	-0.0872	5.974e-10	Prn-AlL		0.3857	-0.0717699	0.0241888	0.00303		0.3921	-0.0613254	0.0459164	0.1819		0.3975	-0.112413	0.0234487	1.702e-06		0.3764	-0.0802039	0.0310044	0.009771
	rs12507002	4	127955818	A	G	INTU	-0.0809	1.081e-08	Prn-AlR		0.3857	-0.0511138	0.0243877	0.03617		0.3921	-0.0250073	0.0463511	0.5896		0.3975	-0.124391	0.0235544	1.359e-07		0.3764	-0.0788817	0.030996	0.01101
	rs4576008	4	127957484	G	A	INTU	-0.0869	6.798e-10	Prn-AlL		0.3856	-0.0706373	0.024185	0.003522		0.3921	-0.0613254	0.0459164	0.1819		0.3975	-0.112413	0.0234487	1.702e-06		0.3771	-0.0807847	0.0310572	0.009364
	rs4576008	4	127957484	G	A	INTU	-0.0806	1.274e-08	Prn-AlR		0.3856	-0.0495595	0.0243841	0.04222		0.3921	-0.0250073	0.0463511	0.5896		0.3975	-0.124391	0.0235544	1.359e-07		0.3771	-0.079617	0.0310485	0.01039
	rs56095322	4	127958702	G	C	INTU	-0.0867	7.13e-10	Prn-AlL		0.3855	-0.0699954	0.0241964	0.003834		0.3921	-0.0613254	0.0459164	0.1819		0.3975	-0.112413	0.0234487	1.702e-06		0.3763	-0.0809431	0.030883	0.008848
	rs56095322	4	127958702	G	C	INTU	-0.0803	1.367e-08	Prn-AlR		0.3855	-0.0492769	0.0243983	0.04343		0.3921	-0.0250073	0.0463511	0.5896		0.3975	-0.124391	0.0235544	1.359e-07		0.3763	-0.0788817	0.030891	0.01072
	rs62324106	4	127959194	C	A	INTU	-0.0867	7.13e-10	Prn-AlL		0.3854	-0.0699954	0.0241964	0.003834		0.3921	-0.0613254	0.0459164	0.1819		0.3975	-0.112413	0.0234487	1.702e-06		0.3763	-0.0809431	0.030883	0.008848
	rs62324106	4	127959194	C	A	INTU	-0.0803	1.367e-08	Prn-AlR		0.3854	-0.0492769	0.0243983	0.04343		0.3921	-0.0250073	0.0463511	0.5896		0.3975	-0.124391	0.0235544	1.359e-07		0.3763	-0.0788817	0.030891	0.01072
	rs62324108	4	127961628	A	T	INTU	-0.0872	5.972e-10	Prn-AlL		0.3852	-0.0713168	0.024219	0.003252		0.3921	-0.0613254	0.0459164	0.1819		0.3975	-0.112413	0.0234487	1.702e-06		0.3763	-0.0807847	0.0308883	0.008958
	rs62324108	4	127961628	A	T	INTU	-0.0808	1.129e-08	Prn-AlR		0.3852	-0.0506546	0.024423	0.03815		0.3921	-0.0250073	0.0463511	0.5896		0.3975	-0.124391	0.0235544	1.359e-07		0.3763	-0.0789343	0.0309015	0.01069
	rs2391127	4	127962412	T	C	INTU	-0.0872	5.877e-10	Prn-AlL		0.3852	-0.0713168	0.024219	0.003252		0.3921	-0.0613254	0.0459164	0.1819		0.3975	-0.112413	0.0234487	1.702e-06		0.3763	-0.0809431	0.030883	0.008848
	rs2391127	4	127962412	T	C	INTU	-0.0808	1.131e-08	Prn-AlR		0.3852	-0.0506546	0.024423	0.03815		0.3921	-0.0250073	0.0463511	0.5896		0.3975	-0.124391	0.0235544	1.359e-07		0.3763	-0.0788817	0.030891	0.01072
	rs764329	4	127964023	T	G	INTU	-0.0872	5.905e-10	Prn-AlL		0.3852	-0.0713168	0.024219	0.003252		0.3921	-0.0613254	0.0459164	0.1819		0.3975	-0.112413	0.0234536	1.704e-06		0.3763	-0.0809431	0.030883	0.008848
	rs764329	4	127964023	T	G	INTU	-0.0808	1.131e-08	Prn-AlR		0.3852	-0.0506546	0.024423	0.03815		0.3921	-0.0250073	0.0463511	0.5896		0.3975	-0.124391	0.0235544	1.362e-07		0.3763	-0.0788817	0.030891	0.01072
	rs764330	4	127964059	G	T	INTU	-0.0875	5.164e-10	Prn-AlL		0.3851	-0.0709015	0.0242341	0.003455		0.3921	-0.0613254	0.0459164	0.1819		0.3973	-0.112743	0.0234637	1.608e-06		0.376	-0.0826855	0.0309041	0.007507
	rs764330	4	127964059	G	T	INTU	-0.0812	9.816e-09	Prn-AlR		0.3851	-0.0503367	0.0244336	0.03953		0.3921	-0.0250073	0.0463511	0.5896		0.3973	-0.124259	0.0235652	1.422e-07		0.376	-0.0814026	0.0308962	0.0085
	rs1024119	4	127964490	T	C	INTU	-0.0872	5.905e-10	Prn-AlL		0.3852	-0.0713168	0.024219	0.003252		0.3921	-0.0613254	0.0459164	0.1819		0.3975	-0.112413	0.0234536	1.704e-06		0.3763	-0.0809431	0.030883	0.008848
	rs1024119	4	127964490	T	C	INTU	-0.0808	1.131e-08	Prn-AlR		0.3852	-0.0506546	0.024423	0.03815		0.3921	-0.0250073	0.0463511	0.5896		0.3975	-0.124391	0.0235544	1.362e-07		0.3763	-0.0788817	0.030891	0.01072
	rs56166314	4	127966405	G	A	INTU	-0.0875	5.042e-10	Prn-AlL		0.3852	-0.0713168	0.024219	0.003252		0.3925	-0.0609372	0.0459843	0.1855		0.3973	-0.113469	0.0234488	1.36e-06		0.3763	-0.0809431	0.030883	0.008848
	rs56166314	4	127966405	G	A	INTU	-0.081	1.036e-08	Prn-AlR		0.3852	-0.0506546	0.024423	0.03815		0.3925	-0.0245852	0.0463909	0.5964		0.3973	-0.125049	0.0235497	1.163e-07		0.3763	-0.0788817	0.030891	0.01072
	rs17277580	4	127968655	C	T	INTU	-0.0815	5.176e-09	Prn-AlL		0.4096	-0.0624069	0.0239887	0.009345		0.418	-0.0444852	0.046256	0.3364		0.4205	-0.106212	0.0233074	5.349e-06		0.4059	-0.0860647	0.0302705	0.00451
	rs17277580	4	127968655	C	T	INTU	-0.0776	3.121e-08	Prn-AlR		0.4096	-0.0407992	0.0241969	0.09192		0.418	-0.028619	0.0467493	0.5405		0.4205	-0.116427	0.0234118	6.879e-07		0.4059	-0.0910134	0.0302713	0.002667
	rs35078448	4	127968678	T	C	INTU	-0.0815	5.176e-09	Prn-AlL		0.4096	-0.0624069	0.0239887	0.009345		0.418	-0.0444852	0.046256	0.3364		0.4205	-0.106212	0.0233074	5.349e-06		0.4059	-0.0860647	0.0302705	0.00451
	rs35078448	4	127968678	T	C	INTU	-0.0776	3.121e-08	Prn-AlR		0.4096	-0.0407992	0.0241969	0.09192		0.418	-0.028619	0.0467493	0.5405		0.4205	-0.116427	0.0234118	6.879e-07		0.4059	-0.0910134	0.0302713	0.002667
	rs12507172	4	127971502	A	T	INTU	-0.0879	4.243e-10	Prn-AlL		0.3852	-0.0719586	0.0242228	0.002993		0.3915	-0.0571044	0.0458921	0.2138		0.3965	-0.114458	0.023445	1.097e-06		0.3763	-0.0816823	0.0308777	0.008224
	rs12507172	4	127971502	A	T	INTU	-0.0803	1.376e-08	Prn-AlR		0.3852	-0.0505133	0.0244265	0.03873		0.3915	-0.0228928	0.0462316	0.6206		0.3965	-0.123272	0.0235476	1.743e-07		0.3763	-0.0796695	0.0308857	0.009986
	rs17277733	4	127972630	T	G	INTU	-0.0821	3.992e-09	Prn-AlL		0.4096	-0.0624069	0.0239887	0.009345		0.4172	-0.0396529	0.0462172	0.3911		0.4195	-0.108323	0.0232853	3.409e-06		0.4059	-0.0871736	0.0302652	0.004017
	rs17277733	4	127972630	T	G	INTU	-0.0775	3.27e-08	Prn-AlR		0.4096	-0.0407992	0.0241969	0.09192		0.4172	-0.0261223	0.0466298	0.5754		0.4195	-0.115966	0.0233945	7.462e-07		0.4059	-0.0921162	0.030266	0.002364
	rs71585499	4	127972913	AAATG	A	INTU	-0.0866	3.366e-09	Prn-AlL		0.4059	-0.0619161	0.0240416	0.01006		NA	NA	NA	NA		0.4195	-0.108323	0.0232853	3.409e-06		0.4058	-0.088916	0.0302916	0.003359
	rs71585499	4	127972913	AAATG	A	INTU	-0.0831	1.605e-08	Prn-AlR		0.4059	-0.0405166	0.0242499	0.0949		NA	NA	NA	NA		0.4195	-0.115966	0.0233945	7.462e-07		0.4058	-0.0945846	0.0302765	0.001809
	rs12509399	4	127973558	A	T	INTU	-0.0823	3.654e-09	Prn-AlL		0.4096	-0.0624069	0.0239887	0.009345		0.4176	-0.0396529	0.0462172	0.3911		0.4195	-0.108323	0.0232853	3.409e-06		0.4057	-0.0882824	0.0303127	0.003631
	rs12509399	4	127973558	A	T	INTU	-0.0777	3e-08	Prn-AlR		0.4096	-0.0407992	0.0241969	0.09192		0.4176	-0.0261223	0.0466298	0.5754		0.4195	-0.115966	0.0233945	7.462e-07		0.4057	-0.0932716	0.0303133	0.002119
	rs1480904	4	127973773	T	C	INTU	-0.0823	3.654e-09	Prn-AlL		0.4096	-0.0624069	0.0239887	0.009345		0.4176	-0.0396529	0.0462172	0.3911		0.4195	-0.108323	0.0232853	3.409e-06		0.4057	-0.0882824	0.0303127	0.003631
	rs1480904	4	127973773	T	C	INTU	-0.0777	3e-08	Prn-AlR		0.4096	-0.0407992	0.0241969	0.09192		0.4176	-0.0261223	0.0466298	0.5754		0.4195	-0.115966	0.0233945	7.462e-07		0.4057	-0.0932716	0.0303133	0.002119
	rs4834169	4	127974125	T	C	INTU	-0.0823	3.654e-09	Prn-AlL		0.4096	-0.0624069	0.0239887	0.009345		0.4177	-0.0396529	0.0462172	0.3911		0.4195	-0.108323	0.0232853	3.409e-06		0.4057	-0.0882824	0.0303127	0.003631
	rs4834169	4	127974125	T	C	INTU	-0.0777	3e-08	Prn-AlR		0.4096	-0.0407992	0.0241969	0.09192		0.4177	-0.0261223	0.0466298	0.5754		0.4195	-0.115966	0.0233945	7.462e-07		0.4057	-0.0932716	0.0303133	0.002119
	rs12510561	4	127974801	C	T	INTU	-0.0818	4.581e-09	Prn-AlL		0.4096	-0.0624069	0.0239887	0.009345		0.4176	-0.0396529	0.0462172	0.3911		0.4198	-0.106806	0.0232743	4.6e-06		0.4057	-0.0882824	0.0303127	0.003631
	rs12510561	4	127974801	C	T	INTU	-0.0771	3.791e-08	Prn-AlR		0.4096	-0.0407992	0.0241969	0.09192		0.4176	-0.0261223	0.0466298	0.5754		0.4198	-0.114321	0.0233881	1.062e-06		0.4057	-0.0932716	0.0303133	0.002119
	rs1912520	4	127975160	A	T	INTU	-0.0881	3.883e-10	Prn-AlL		0.3852	-0.0719586	0.0242228	0.002993		0.3915	-0.0571044	0.0458921	0.2138		0.3965	-0.114458	0.023445	1.097e-06		0.3767	-0.0826855	0.0309041	0.007533
	rs1912520	4	127975160	A	T	INTU	-0.0805	1.298e-08	Prn-AlR		0.3852	-0.0505133	0.0244265	0.03873		0.3915	-0.0228928	0.0462316	0.6206		0.3965	-0.123272	0.0235476	1.743e-07		0.3767	-0.0804048	0.030912	0.00935
	rs13126154	4	127975793	C	A	INTU	-0.0815	4.736e-09	Prn-AlL		0.4175	-0.0582163	0.0238906	0.01487		0.4269	-0.0431752	0.04629	0.3512		0.4274	-0.10674	0.0232701	4.654e-06		0.4094	-0.0925592	0.0302019	0.002209
	rs13126154	4	127975793	C	A	INTU	-0.0784	2.159e-08	Prn-AlR		0.4175	-0.0431659	0.0240874	0.07324		0.4269	-0.026178	0.0467891	0.5758		0.4274	-0.112412	0.0233754	1.575e-06		0.4094	-0.0986284	0.0302293	0.001118
	rs1510664	4	127976261	G	A	INTU	-0.0818	4.581e-09	Prn-AlL		0.4096	-0.0624069	0.0239887	0.009345		0.4176	-0.0396529	0.0462172	0.3911		0.4198	-0.106806	0.0232743	4.6e-06		0.4057	-0.0882824	0.0303127	0.003631
	rs1510664	4	127976261	G	A	INTU	-0.0771	3.791e-08	Prn-AlR		0.4096	-0.0407992	0.0241969	0.09192		0.4176	-0.0261223	0.0466298	0.5754		0.4198	-0.114321	0.0233881	1.062e-06		0.4057	-0.0932716	0.0303133	0.002119
	rs62333855	4	127977899	A	G	INTU	-0.0884	3.488e-10	Prn-AlL		0.3852	-0.0719586	0.0242228	0.002993		0.3915	-0.0571044	0.0458921	0.2138		0.3965	-0.114458	0.023445	1.097e-06		0.3761	-0.0838471	0.0309147	0.006747
	rs62333855	4	127977899	A	G	INTU	-0.081	1.046e-08	Prn-AlR		0.3852	-0.0505133	0.0244265	0.03873		0.3915	-0.0228928	0.0462316	0.6206		0.3965	-0.123272	0.0235476	1.743e-07		0.3761	-0.0828731	0.0309067	0.007402
	rs1600664	4	127979293	T	C	INTU	-0.0824	3.499e-09	Prn-AlL		0.4096	-0.0624069	0.0239887	0.009345		0.4176	-0.0396529	0.0462172	0.3911		0.4195	-0.108323	0.0232853	3.409e-06		0.4055	-0.0887048	0.0302969	0.003452
	rs1600664	4	127979293	T	C	INTU	-0.0776	3.12e-08	Prn-AlR		0.4096	-0.0407992	0.0241969	0.09192		0.4176	-0.0261223	0.0466298	0.5754		0.4195	-0.115966	0.0233945	7.462e-07		0.4055	-0.0927465	0.0302923	0.002227
	rs12498487	4	127979788	G	A	INTU	-0.0818	4.387e-09	Prn-AlL		0.4096	-0.0624069	0.0239887	0.009345		0.4176	-0.0396529	0.0462172	0.3911		0.4198	-0.106806	0.0232743	4.6e-06		0.4055	-0.0887048	0.0302969	0.003452
	rs12498487	4	127979788	G	A	INTU	-0.077	3.941e-08	Prn-AlR		0.4096	-0.0407992	0.0241969	0.09192		0.4176	-0.0261223	0.0466298	0.5754		0.4198	-0.114321	0.0233881	1.062e-06		0.4055	-0.0927465	0.0302923	0.002227
	rs12510258	4	127979820	C	T	INTU	-0.0818	4.387e-09	Prn-AlL		0.4096	-0.0624069	0.0239887	0.009345		0.4176	-0.0396529	0.0462172	0.3911		0.4198	-0.106806	0.0232743	4.6e-06		0.4055	-0.0887048	0.0302969	0.003452
	rs12510258	4	127979820	C	T	INTU	-0.077	3.941e-08	Prn-AlR		0.4096	-0.0407992	0.0241969	0.09192		0.4176	-0.0261223	0.0466298	0.5754		0.4198	-0.114321	0.0233881	1.062e-06		0.4055	-0.0927465	0.0302923	0.002227
	rs12506106	4	127979865	T	C	INTU	-0.0819	4.275e-09	Prn-AlL		0.4096	-0.0624069	0.0239887	0.009345		0.4176	-0.0396529	0.0462172	0.3911		0.4198	-0.106806	0.0232743	4.6e-06		0.4057	-0.0890216	0.0303075	0.003346
	rs12506106	4	127979865	T	C	INTU	-0.0771	3.889e-08	Prn-AlR		0.4096	-0.0407992	0.0241969	0.09192		0.4176	-0.0261223	0.0466298	0.5754		0.4198	-0.114321	0.0233881	1.062e-06		0.4057	-0.0929565	0.030308	0.00219
	rs12506951	4	127979946	A	C	INTU	-0.088	4.036e-10	Prn-AlL		0.3852	-0.0719586	0.0242228	0.002993		0.3915	-0.0571044	0.0458921	0.2138		0.3965	-0.114458	0.023445	1.097e-06		0.3764	-0.0822631	0.0308988	0.007829
	rs12506951	4	127979946	A	C	INTU	-0.0805	1.273e-08	Prn-AlR		0.3852	-0.0505133	0.0244265	0.03873		0.3915	-0.0228928	0.0462316	0.6206		0.3965	-0.123272	0.0235476	1.743e-07		0.3764	-0.0806148	0.0309067	0.00915
	rs12500440	4	127981316	G	A	INTU	-0.0815	5.101e-09	Prn-AlL		0.4095	-0.0624069	0.0239887	0.009345		0.4188	-0.0365332	0.0463725	0.431		0.4198	-0.106806	0.0232743	4.6e-06		0.4054	-0.0883352	0.0302811	0.003577
	rs12500440	4	127981316	G	A	INTU	-0.0777	3.015e-08	Prn-AlR		0.4095	-0.0407992	0.0241969	0.09192		0.4188	-0.0323542	0.04659	0.4876		0.4198	-0.114321	0.0233881	1.062e-06		0.4054	-0.0931666	0.0302818	0.002115
	rs28719170	4	127981685	C	T	INTU	-0.0815	5.101e-09	Prn-AlL		0.4095	-0.0624069	0.0239887	0.009345		0.4188	-0.0365332	0.0463725	0.431		0.4198	-0.106806	0.0232743	4.6e-06		0.4054	-0.0883352	0.0302811	0.003577
	rs28719170	4	127981685	C	T	INTU	-0.0777	3.015e-08	Prn-AlR		0.4095	-0.0407992	0.0241969	0.09192		0.4188	-0.0323542	0.04659	0.4876		0.4198	-0.114321	0.0233881	1.062e-06		0.4054	-0.0931666	0.0302818	0.002115
	rs62333857	4	127981971	G	A	INTU	-0.0815	5.101e-09	Prn-AlL		0.4095	-0.0624069	0.0239887	0.009345		0.4188	-0.0365332	0.0463725	0.431		0.4198	-0.106806	0.0232743	4.6e-06		0.4054	-0.0883352	0.0302811	0.003577
	rs62333857	4	127981971	G	A	INTU	-0.0777	3.015e-08	Prn-AlR		0.4095	-0.0407992	0.0241969	0.09192		0.4188	-0.0323542	0.04659	0.4876		0.4198	-0.114321	0.0233881	1.062e-06		0.4054	-0.0931666	0.0302818	0.002115
	rs17278241	4	127982115	T	A	INTU	-0.0815	5.191e-09	Prn-AlL		0.4095	-0.0624069	0.0239887	0.009345		0.4184	-0.036082	0.0463725	0.4367		0.4198	-0.106806	0.0232743	4.6e-06		0.4054	-0.0883352	0.0302811	0.003577
	rs17278241	4	127982115	T	A	INTU	-0.0777	3.047e-08	Prn-AlR		0.4095	-0.0407992	0.0241969	0.09192		0.4184	-0.0320635	0.04659	0.4916		0.4198	-0.114321	0.0233881	1.062e-06		0.4054	-0.0931666	0.0302818	0.002115
	rs4834171	4	127983207	A	C	INTU	-0.0877	4.779e-10	Prn-AlL		0.3851	-0.0715811	0.0242379	0.003172		0.3921	-0.0541934	0.0460328	0.2394		0.3967	-0.114788	0.0234453	1.02e-06		0.3763	-0.0818935	0.0308883	0.008072
	rs4834171	4	127983207	A	C	INTU	-0.0811	1.011e-08	Prn-AlR		0.3851	-0.0495949	0.0244371	0.04251		0.3921	-0.0285115	0.0461918	0.5372		0.3967	-0.12393	0.0235429	1.489e-07		0.3763	-0.081035	0.0308962	0.008765
	rs4834173	4	127983463	G	C	INTU	-0.0879	4.383e-10	Prn-AlL		0.3851	-0.0719586	0.0242228	0.002993		0.3926	-0.0541934	0.0460328	0.2394		0.3968	-0.11492	0.0234435	9.918e-07		0.3763	-0.0818935	0.0308883	0.008072
	rs4834173	4	127983463	G	C	INTU	-0.0813	9.272e-09	Prn-AlR		0.3851	-0.0505133	0.0244265	0.03873		0.3926	-0.0285115	0.0461918	0.5372		0.3968	-0.123667	0.0235466	1.589e-07		0.3763	-0.081035	0.0308962	0.008765
	rs4834174	4	127983494	A	C	INTU	-0.0879	4.383e-10	Prn-AlL		0.3851	-0.0719586	0.0242228	0.002993		0.3926	-0.0541934	0.0460328	0.2394		0.3968	-0.11492	0.0234435	9.918e-07		0.3763	-0.0818935	0.0308883	0.008072
	rs4834174	4	127983494	A	C	INTU	-0.0813	9.272e-09	Prn-AlR		0.3851	-0.0505133	0.0244265	0.03873		0.3926	-0.0285115	0.0461918	0.5372		0.3968	-0.123667	0.0235466	1.589e-07		0.3763	-0.081035	0.0308962	0.008765
	rs4833368	4	127983548	T	G	INTU	-0.0879	4.383e-10	Prn-AlL		0.3851	-0.0719586	0.0242228	0.002993		0.3926	-0.0541934	0.0460328	0.2394		0.3968	-0.11492	0.0234435	9.918e-07		0.3763	-0.0818935	0.0308883	0.008072
	rs4833368	4	127983548	T	G	INTU	-0.0813	9.272e-09	Prn-AlR		0.3851	-0.0505133	0.0244265	0.03873		0.3926	-0.0285115	0.0461918	0.5372		0.3968	-0.123667	0.0235466	1.589e-07		0.3763	-0.081035	0.0308962	0.008765
	rs62335474	4	127983822	A	G	INTU	-0.0905	1.655e-09	Prn-AlL		0.3475	-0.0664466	0.0251478	0.008288		NA	NA	NA	NA		0.3949	-0.116108	0.0234893	8.032e-07		0.3762	-0.0823159	0.0308883	0.007747
	rs62335474	4	127983822	A	G	INTU	-0.0869	7.938e-09	Prn-AlR		0.3475	-0.046451	0.0253661	0.06726		NA	NA	NA	NA		0.3949	-0.125049	0.0235497	1.159e-07		0.3762	-0.0814026	0.0309015	0.008499
	rs35148853	4	154819521	G	A	SFRP2	0.1323	1.13e-09	EnL-AlL		0.1292	0.083146	0.0372525	0.02568		NA	NA	NA	NA		0.1208	0.16607	0.0328786	4.609e-07		0.1259	0.141159	0.0459789	0.002173
	rs35148853	4	154819521	G	A	SFRP2	-0.1236	7.802e-09	AlL-Ls		0.1292	-0.070995	0.0337089	0.03522		NA	NA	NA	NA		0.1208	-0.204639	0.0346728	3.925e-09		0.1259	-0.0786384	0.0461714	0.08864
	rs10020603	4	154820806	T	C	SFRP2	0.1093	4.867e-09	EnR-AlR		0.1836	0.0554912	0.032696	0.08968		NA	NA	NA	NA		0.1739	0.13538	0.0283696	1.895e-06		0.1971	0.135318	0.0381078	0.000393
	rs10020603	4	154820806	T	C	SFRP2	0.122	5.052e-11	EnL-AlL		0.1836	0.0615433	0.0325728	0.05888		NA	NA	NA	NA		0.1739	0.167721	0.0281033	2.625e-09		0.1971	0.120705	0.0380508	0.001534
	rs10020603	4	154820806	T	C	SFRP2	0.1082	1.459e-08	ExL-AlL		0.1836	0.0390704	0.0320728	0.2233		NA	NA	NA	NA		0.1739	0.167381	0.0304384	4.079e-08		0.1971	0.11312	0.0380738	0.003002
	rs6535972	4	154824681	C	G	SFRP2	0.1077	5.048e-10	EnR-AlR		0.1931	0.045016	0.0320778	0.1606		0.1899	0.115779	0.0544698	0.0338		0.1846	0.138479	0.0276791	5.905e-07		0.212	0.13283	0.0373143	0.0003787
	rs6535972	4	154824681	C	G	SFRP2	0.1198	3.509e-12	EnL-AlL		0.1931	0.0609447	0.0319579	0.05668		0.1899	0.123563	0.0541494	0.02274		0.1846	0.163134	0.0274452	3.046e-09		0.212	0.118385	0.0372558	0.001508
	rs6535972	4	154824681	C	G	SFRP2	0.1064	1.854e-09	ExL-AlL		0.1931	0.0451241	0.0314634	0.1516		0.1899	0.100319	0.0547547	0.06724		0.1846	0.160417	0.0297399	7.341e-08		0.212	0.110279	0.037328	0.003162
	rs9995821	4	154828366	C	T	SFRP2	0.1176	1.747e-10	EnR-AlR		0.1858	0.0618191	0.0325889	0.05796		NA	NA	NA	NA		0.18	0.147911	0.0276935	9.781e-08		0.2016	0.136347	0.0378462	0.0003228
	rs9995821	4	154828366	C	T	SFRP2	0.1254	8.055e-12	EnL-AlL		0.1858	0.0697055	0.0324639	0.03183		NA	NA	NA	NA		0.18	0.168821	0.0274462	8.534e-10		0.2016	0.118385	0.0378402	0.001778
	rs9995821	4	154828366	C	T	SFRP2	0.112	2.981e-09	ExL-AlL		0.1858	0.0483899	0.0319652	0.1302		NA	NA	NA	NA		0.18	0.164368	0.0297553	3.546e-08		0.2016	0.116459	0.0378607	0.002118
	rs9995821	4	154828366	C	T	SFRP2	-0.1002	3.239e-08	AlL-Ls		0.1858	-0.0542526	0.0293769	0.06493		NA	NA	NA	NA		0.18	-0.155192	0.0290405	9.655e-08		0.2016	-0.0832133	0.0378908	0.0282
	rs34487925	4	154845748	G	A	SFRP2	0.1123	3.326e-08	EnR-AlR		0.1481	0.0487738	0.035933	0.1748		NA	NA	NA	NA		0.1405	0.144903	0.0306999	2.447e-06		0.163	0.137119	0.0413417	0.0009263
	rs34487925	4	154845748	G	A	SFRP2	0.1176	6.014e-09	EnL-AlL		0.1481	0.0567548	0.0358377	0.1133		NA	NA	NA	NA		0.1405	0.154925	0.0304491	3.8e-07		0.163	0.129729	0.0412177	0.001666
	rs4315762	4	154863425	G	C	SFRP2	0.1161	2.561e-09	EnR-AlR		0.1654	0.0667355	0.0343851	0.05241		NA	NA	NA	NA		0.1534	0.154062	0.0294631	1.799e-07		0.1767	0.112972	0.039669	0.004438
	rs4315762	4	154863425	G	C	SFRP2	0.1117	8.583e-09	EnL-AlL		0.1654	0.0564283	0.0342868	0.09992		NA	NA	NA	NA		0.1534	0.156209	0.0292198	9.532e-08		0.1767	0.103474	0.039645	0.009099
	rs2225718	6	18837244	C	T	RNF144B	-0.086	2.968e-08	EnR-AlR		0.4092	-0.106066	0.0252144	2.654e-05		0.4219	-0.0742009	0.0446682	0.09694		0.4192	-0.0737276	0.0219427	0.0007877		NA	NA	NA	NA
	rs7738892	6	39563863	T	C	KIF6	0.113	1.342e-08	EnR-N		0.1475	0.123714	0.0355488	0.0005086		0.1368	0.0835825	0.0661392	0.2069		0.1385	0.162546	0.0327978	7.529e-07		0.1538	0.0302288	0.0416019	0.4676
	rs12528606	6	39581963	C	T	KIF6	0.1153	3.828e-08	EnR-N		0.1477	0.123293	0.0355277	0.0005285		NA	NA	NA	NA		0.1389	0.160471	0.0327759	1.022e-06		0.1493	0.0274774	0.0426262	0.5193
	rs1700048	8	4089422	C	A	CSMD1	-0.215	3.936e-08	ExR-ChL		0.03136	-0.185477	0.070574	0.008606		0.02797	-0.138076	0.13804	0.3174		0.03113	-0.207804	0.0662006	0.001711		0.0401	-0.28282	0.076395	0.0002173
	rs9642796	8	88597076	A	G	DCAF4L2	-0.1148	4.524e-08	AlL-Ls		0.2463	-0.143042	0.0260605	4.365e-08		NA	NA	NA	NA		NA	NA	NA	NA		0.2328	-0.062626	0.0353949	0.07691
	rs56009112	9	94480903	A	G	ROR2	0.0854	1.455e-08	EnL-Sn		0.2947	0.0953269	0.0266233	0.0003481		0.3115	0.0690926	0.0476914	0.1478		0.3156	0.0978352	0.0244894	6.604e-05		0.3024	0.0542889	0.0336682	0.107
	rs7466603	9	94483198	T	C	ROR2	0.0854	1.368e-08	EnL-Sn		0.2943	0.0963506	0.0266404	0.0003023		0.3105	0.0688159	0.0473686	0.1467		0.3145	0.0981496	0.0244153	5.944e-05		0.3026	0.0522125	0.0335247	0.1196
	rs10992062	9	94483958	A	G	ROR2	0.0862	1.004e-08	EnL-Sn		0.2946	0.095199	0.026602	0.0003506		0.3148	0.0793781	0.0475992	0.09579		0.3147	0.0982395	0.0244073	5.801e-05		0.3022	0.0524013	0.03357	0.1188
	rs2230578	9	94485928	C	T	ROR2	0.0865	9.02e-09	EnL-Sn		0.2946	0.0959241	0.0266233	0.0003185		0.312	0.0729669	0.0477375	0.1268		0.3193	0.10053	0.0243947	3.856e-05		0.3027	0.0516085	0.0336418	0.125
	rs201719697	10	70946091	A	AAAAAAAAAAG	SUPV3L1	-0.2775	3.421e-08	ExL-AlL		0.02775	-0.252066	0.0760299	0.0009277		NA	NA	NA	NA		0.03078	-0.297325	0.0670556	9.515e-06		NA	NA	NA	NA
	rs7962589	12	115401195	G	A	TBX3	-0.078	1.218e-08	Prn-AlR		0.4763	-0.0605453	0.0236706	0.0106		0.4942	-0.139651	0.04436	0.001696		0.483	-0.0782543	0.0225777	0.0005344		0.4938	-0.0775163	0.0304813	0.01109
	rs1896328	12	115410956	C	A	TBX3	-0.0778	1.364e-08	Prn-AlR		0.476	-0.0618876	0.0236529	0.008919		0.4942	-0.134952	0.0444795	0.002485		0.4829	-0.0777277	0.0225756	0.0005809		0.494	-0.0773587	0.0304918	0.01126
	rs10744843	12	115412743	C	T	TBX3	-0.0762	2.83e-08	Prn-AlR		0.474	-0.0592383	0.0236883	0.01243		0.4937	-0.132881	0.0445591	0.002919		0.4821	-0.0775303	0.0226234	0.0006163		0.4945	-0.075258	0.0305601	0.01389
	rs1896333	12	115414784	G	A	TBX3	-0.0758	3.356e-08	Prn-AlR		0.4739	-0.0587084	0.0236989	0.01328		0.4937	-0.132881	0.0445591	0.002919		0.4815	-0.0776619	0.0226222	0.0006026		0.4933	-0.0738926	0.0305601	0.01569
	rs1317713	12	115418577	G	A	TBX3	-0.0873	2.378e-10	Prn-AlR		0.4535	-0.0672215	0.0237801	0.004724		0.4669	-0.137938	0.0452361	0.002363		0.4583	-0.0928652	0.0226556	4.24e-05		0.4732	-0.087127	0.0306809	0.004567
	rs1317714	12	115418686	T	C	TBX3	-0.0874	2.231e-10	Prn-AlR		0.4535	-0.0672215	0.0237801	0.004724		0.4668	-0.13973	0.0453157	0.002102		0.4583	-0.0928652	0.0226556	4.24e-05		0.4732	-0.087127	0.0306809	0.004567
	rs1317715	12	115418799	C	T	TBX3	-0.0878	1.894e-10	Prn-AlR		0.4535	-0.0672215	0.0237801	0.004724		0.4668	-0.13973	0.0453157	0.002102		0.4583	-0.0928652	0.0226556	4.24e-05		0.4732	-0.0888601	0.0306862	0.003817
	rs56363935	12	115418870	C	G	TBX3	-0.0877	1.97e-10	Prn-AlR		0.4537	-0.0679986	0.0237766	0.004267		0.4669	-0.13973	0.0453157	0.002102		0.4583	-0.0928652	0.0226556	4.24e-05		0.4732	-0.087127	0.0306809	0.004567
	rs55674676	12	115418874	T	TG	TBX3	-0.0874	2.231e-10	Prn-AlR		0.4535	-0.0672215	0.0237801	0.004724		0.4663	-0.13973	0.0453157	0.002102		0.4583	-0.0928652	0.0226556	4.24e-05		0.4732	-0.087127	0.0306809	0.004567
	rs7957333	12	115419359	A	G	TBX3	-0.0874	2.231e-10	Prn-AlR		0.4535	-0.0672215	0.0237801	0.004724		0.4668	-0.13973	0.0453157	0.002102		0.4583	-0.0928652	0.0226556	4.24e-05		0.4732	-0.087127	0.0306809	0.004567
	rs7975876	12	115419496	C	T	TBX3	-0.0855	5.743e-10	Prn-AlR		0.4579	-0.0636185	0.0238048	0.007582		0.472	-0.132284	0.0456343	0.003828		0.4583	-0.0928652	0.0226556	4.24e-05		0.4732	-0.087127	0.0306809	0.004567
	rs7973082	12	115419641	G	A	TBX3	-0.0884	1.567e-10	Prn-AlR		0.4535	-0.0671862	0.0237872	0.004767		0.4667	-0.13973	0.0453157	0.002102		0.4558	-0.0955637	0.0227967	2.827e-05		0.4732	-0.087127	0.0306809	0.004567
	rs7957733	12	115419713	C	G	TBX3	-0.0884	1.567e-10	Prn-AlR		0.4535	-0.0671862	0.0237872	0.004767		0.4667	-0.13973	0.0453157	0.002102		0.4558	-0.0955637	0.0227967	2.827e-05		0.4732	-0.087127	0.0306809	0.004567
	rs2098989	12	115419818	A	G	TBX3	-0.0884	1.567e-10	Prn-AlR		0.4535	-0.0671862	0.0237872	0.004767		0.4667	-0.13973	0.0453157	0.002102		0.4558	-0.0955637	0.0227967	2.827e-05		0.4732	-0.087127	0.0306809	0.004567
	rs2098990	12	115419855	A	C	TBX3	-0.0885	1.521e-10	Prn-AlR		0.4535	-0.0671862	0.0237872	0.004767		0.4667	-0.13973	0.0453157	0.002102		0.4558	-0.0955637	0.0227967	2.827e-05		0.4729	-0.0874947	0.0307019	0.004422
	rs1863716	12	115420240	A	C	TBX3	-0.0885	1.472e-10	Prn-AlR		0.4535	-0.0671862	0.0237872	0.004767		0.4667	-0.13973	0.0453157	0.002102		0.4556	-0.0959586	0.0228093	2.654e-05		0.4732	-0.0871796	0.0306862	0.004548
	rs112907299	12	115420408	A	AAG	TBX3	-0.0883	1.672e-10	Prn-AlR		0.452	-0.0665857	0.0237836	0.005144		0.4644	-0.143752	0.0455547	0.001656		0.4556	-0.0950371	0.0228071	3.156e-05		0.4732	-0.087127	0.0306862	0.004572
	rs1863717	12	115420508	T	C	TBX3	-0.0884	1.569e-10	Prn-AlR		0.4535	-0.0671862	0.0237872	0.004767		0.4665	-0.13973	0.0453157	0.002102		0.4558	-0.0955637	0.0227967	2.827e-05		0.4732	-0.087127	0.0306862	0.004563
	rs1863718	12	115420540	T	A	TBX3	-0.0884	1.558e-10	Prn-AlR		0.4535	-0.0671862	0.0237872	0.004767		0.4662	-0.13973	0.0453157	0.002102		0.4556	-0.0956953	0.0228172	2.801e-05		0.4732	-0.087127	0.0306862	0.004563
	rs7325564	13	51724664	T	C	LINC00371	0.0943	1.34e-08	N-Prn		0.2654	0.134406	0.0275637	1.132e-06		NA	NA	NA	NA		0.2676	0.0802321	0.0263835	0.002377		0.2829	0.0570919	0.0337287	0.09061
	rs1989285	14	98384537	G	C	C14orf64	-0.1035	4.538e-08	N-Prn		0.4793	-0.106983	0.0243072	1.108e-05		NA	NA	NA	NA		NA	NA	NA	NA		0.494	-0.0982244	0.0301913	0.001159
	rs16949899	16	51564940	T	G	SALL1	-0.1261	3.35e-08	ExR-ChL		0.2349	-0.120487	0.0294624	4.42e-05		NA	NA	NA	NA		NA	NA	NA	NA		0.2462	-0.134577	0.0361475	0.0002024
	rs4783815	16	53618503	A	T	RPGRIP1L/FTO	-0.0891	7.1e-09	AlL-Ls		0.3078	-0.0659174	0.0245601	0.007328		NA	NA	NA	NA		0.2995	-0.102384	0.0250022	4.315e-05		0.3106	-0.106647	0.0321467	0.0009215
	rs4784321	16	53636409	T	C	RPGRIP1L/FTO	-0.0909	4.832e-08	Prn-Ls		0.2284	-0.0365683	0.0291684	0.2098		0.2211	-0.0703167	0.0550581	0.2021		0.2221	-0.126958	0.0277081	4.752e-06		0.2293	-0.120443	0.0353853	0.0006797
	rs2241179	16	53645394	C	T	RPGRIP1L/FTO	-0.0805	3.928e-08	AlL-Ls		0.3095	-0.0616632	0.0245921	0.01221		0.3076	0.0273036	0.0499082	0.5844		0.3045	-0.109688	0.0248444	1.041e-05		0.3183	-0.108223	0.031923	0.0007104
	rs9922174	16	53645832	A	T	RPGRIP1L/FTO	-0.0845	1.751e-08	AlL-Ls		0.2811	-0.0637217	0.0252188	0.01157		0.2804	-0.0112519	0.0507427	0.8245		0.2811	-0.109753	0.0254175	1.615e-05		0.2895	-0.107816	0.0326042	0.0009577
	rs9929804	16	53645838	T	C	RPGRIP1L/FTO	-0.0845	1.751e-08	AlL-Ls		0.2811	-0.0637217	0.0252188	0.01157		0.2804	-0.0112519	0.0507427	0.8245		0.2811	-0.109753	0.0254175	1.615e-05		0.2895	-0.107816	0.0326042	0.0009577
	rs55662133	16	53646673	T	A	RPGRIP1L/FTO	-0.0959	4.16e-08	Prn-Ls		0.2018	-0.0481826	0.0303962	0.1131		0.1922	-0.0674084	0.0576477	0.2426		0.1911	-0.122994	0.029187	2.566e-05		0.1966	-0.1361	0.0375266	0.0002942
	rs8059593	16	53646692	C	T	RPGRIP1L/FTO	-0.0846	1.687e-08	AlL-Ls		0.28	-0.0632642	0.0252142	0.01215		0.2801	-0.00692252	0.0508828	0.8919		0.2804	-0.109365	0.0254515	1.777e-05		0.2889	-0.111731	0.0326194	0.0006268
	rs8050354	16	53649168	T	C	RPGRIP1L/FTO	-0.081	3.238e-08	AlL-Ls		0.3078	-0.0610685	0.0245967	0.01306		0.3073	0.0346126	0.0499138	0.4882		0.3041	-0.108266	0.0248431	1.35e-05		0.3156	-0.117068	0.0319535	0.0002552
	rs6499635	16	53655149	A	T	RPGRIP1L/FTO	-0.0811	3.268e-08	AlL-Ls		0.3078	-0.0610685	0.0245967	0.01306		0.3069	0.0351223	0.0499474	0.4821		0.304	-0.108395	0.0248727	1.347e-05		0.3154	-0.117322	0.031984	0.0002499
	rs11322448	16	53658308	C	CA	RPGRIP1L/FTO	-0.0833	3.132e-08	AlL-Ls		0.2779	-0.0649567	0.025292	0.01028		0.2769	-0.00253322	0.0516725	0.9609		0.2789	-0.104646	0.0255049	4.167e-05		0.2888	-0.111121	0.0326448	0.0006763
	rs2388231	16	53660482	C	T	RPGRIP1L/FTO	-0.0807	3.762e-08	AlL-Ls		0.3078	-0.0603366	0.0245967	0.01423		0.3066	0.0366009	0.0498634	0.4631		0.3042	-0.108589	0.0248716	1.299e-05		0.3156	-0.117068	0.0319535	0.0002552
	rs13329973	16	53660866	A	G	RPGRIP1L/FTO	-0.0807	3.762e-08	AlL-Ls		0.3078	-0.0603366	0.0245967	0.01423		0.3067	0.0366009	0.0498634	0.4631		0.3042	-0.108589	0.0248716	1.299e-05		0.3156	-0.117068	0.0319535	0.0002552
	rs1077352	16	53665337	A	G	RPGRIP1L/FTO	-0.0807	3.662e-08	AlL-Ls		0.3077	-0.0603366	0.0245967	0.01423		0.3069	0.0366009	0.0498634	0.4631		0.3041	-0.108783	0.0248704	1.253e-05		0.3156	-0.117068	0.0319535	0.0002552
	rs7203525	16	53672355	T	C	RPGRIP1L/FTO	-0.0837	2.416e-08	AlL-Ls		0.2799	-0.0634929	0.0252096	0.01181		0.2793	-0.00176815	0.0507315	0.9722		0.2805	-0.108201	0.0254472	2.171e-05		0.2888	-0.111121	0.0326448	0.0006763
	rs9928935	16	53685739	T	C	RPGRIP1L/FTO	-0.0841	2.056e-08	AlL-Ls		0.2798	-0.064728	0.0252096	0.01028		0.2793	-0.00176815	0.0507315	0.9722		0.2806	-0.108137	0.025444	2.19e-05		0.2888	-0.111121	0.0326448	0.0006763
	rs9925121	16	53689678	C	A	RPGRIP1L/FTO	-0.0841	2.056e-08	AlL-Ls		0.2798	-0.064728	0.0252096	0.01028		0.2793	-0.00176815	0.0507315	0.9722		0.2806	-0.108137	0.025444	2.19e-05		0.2888	-0.111121	0.0326448	0.0006763
	rs4467070	16	53697024	T	C	RPGRIP1L/FTO	-0.0838	2.409e-08	AlL-Ls		0.2796	-0.0643163	0.0252096	0.01076		0.2792	-0.00176815	0.0507315	0.9722		0.2806	-0.108331	0.0254596	2.139e-05		0.288	-0.110053	0.0327363	0.0007869
	rs4310844	16	53715309	T	C	RPGRIP1L/FTO	-0.0811	3.344e-08	AlL-Ls		0.3073	-0.0623951	0.0245875	0.01122		0.3031	0.0444979	0.0505411	0.3788		0.304	-0.108783	0.0248989	1.282e-05		0.3154	-0.117322	0.0319688	0.0002489
	rs2892489	16	53724768	A	C	RPGRIP1L/FTO	-0.0819	2.517e-08	AlL-Ls		0.3077	-0.0615259	0.0246104	0.01245		0.3059	0.0319074	0.0507988	0.5301		0.3042	-0.108266	0.0248945	1.408e-05		0.3142	-0.118135	0.0320399	0.0002329
	rs7188089	16	53731010	G	T	RPGRIP1L/FTO	-0.0841	2.123e-08	AlL-Ls		0.2797	-0.0639504	0.0252096	0.01123		0.2771	-0.0075498	0.0509332	0.8822		0.2806	-0.107749	0.0254846	2.412e-05		0.2874	-0.110866	0.0327313	0.0007189
	rs7404301	16	53735383	G	A	RPGRIP1L/FTO	-0.0929	3.486e-09	AlL-Ls		0.2781	-0.067244	0.0252371	0.007735		NA	NA	NA	NA		0.2807	-0.108137	0.0254799	2.246e-05		0.2874	-0.110866	0.0327313	0.0007189
	rs141271147	17	69106980	C	T	CASC17	-0.0822	5.861e-09	EnR-Prn		0.3708	-0.0806705	0.0247169	0.001112		0.3594	-0.057202	0.0452389	0.2066		0.3706	-0.0702131	0.0227448	0.002038		0.3312	-0.121776	0.0323332	0.0001702
	rs141271147	17	69106980	C	T	CASC17	-0.0869	7.346e-10	Prn-EnL		0.3708	-0.0843139	0.0248275	0.0006927		0.3594	-0.0566711	0.0453516	0.2118		0.3706	-0.0751913	0.0226071	0.0008893		0.3312	-0.130466	0.0323028	5.552e-05
	rs11650165	17	69109618	T	C	CASC17	-0.0829	3.018e-09	EnR-Prn		0.3785	-0.0902629	0.024566	0.0002429		0.3725	-0.0510548	0.0447604	0.2541		0.3884	-0.0678501	0.0223928	0.002462		0.3473	-0.117888	0.0321809	0.0002547
	rs11650165	17	69109618	T	C	CASC17	-0.0882	2.637e-10	Prn-EnL		0.3785	-0.0905886	0.024673	0.0002455		0.3725	-0.0551275	0.0447635	0.2184		0.3884	-0.0765879	0.022251	0.0005835		0.3473	-0.125447	0.0321194	9.695e-05
	rs4793528	17	69110773	G	A	CASC17	-0.0821	4.279e-09	EnR-Prn		0.3787	-0.0891622	0.0245628	0.0002879		0.3747	-0.0543677	0.0447972	0.2252		0.3886	-0.0659373	0.0223896	0.003246		0.3477	-0.117693	0.0321744	0.0002602
	rs4793528	17	69110773	G	A	CASC17	-0.0876	3.436e-10	Prn-EnL		0.3787	-0.0907462	0.0246699	0.0002382		0.3747	-0.054172	0.0449841	0.2287		0.3886	-0.0753046	0.0222268	0.000711		0.3477	-0.125254	0.0321291	9.978e-05
	rs9674957	17	69111098	A	G	CASC17	-0.0847	1.216e-09	EnR-Prn		0.3858	-0.0948861	0.0244779	0.0001085		0.3803	-0.0520487	0.0447604	0.2452		0.3972	-0.0608738	0.0224213	0.006651		0.3646	-0.131692	0.0317337	3.448e-05
	rs9674957	17	69111098	A	G	CASC17	-0.0921	3.638e-11	Prn-EnL		0.3858	-0.100142	0.0245816	4.725e-05		0.3803	-0.0575164	0.0448003	0.1995		0.3972	-0.0714167	0.022262	0.001349		0.3646	-0.137834	0.0316947	1.433e-05
	rs8077906	17	69112233	A	G	CASC17	-0.0867	6.783e-10	EnR-Prn		0.378	-0.0908919	0.0246163	0.0002254		0.3666	-0.0563186	0.044834	0.2094		0.3791	-0.0654872	0.0226913	0.003927		0.3479	-0.137265	0.0319994	1.866e-05
	rs8077906	17	69112233	A	G	CASC17	-0.0932	2.997e-11	Prn-EnL		0.378	-0.0974308	0.0247235	8.306e-05		0.3666	-0.0602728	0.0449106	0.1799		0.3791	-0.0716431	0.0225293	0.001487		0.3479	-0.14636	0.0319489	4.889e-06
	rs8066875	17	69113577	T	A	CASC17	-0.0829	4.216e-09	EnR-Prn		0.3693	-0.0829979	0.0247736	0.0008173		0.359	-0.0566499	0.0447972	0.2062		0.3705	-0.0704006	0.0226733	0.001916		0.3296	-0.12223	0.0324693	0.0001703
	rs8066875	17	69113577	T	A	CASC17	-0.0883	3.728e-10	Prn-EnL		0.3693	-0.0862058	0.0248874	0.0005404		0.359	-0.0592805	0.0448371	0.1864		0.3705	-0.0760972	0.0225206	0.0007347		0.3296	-0.132332	0.0324315	4.675e-05
	rs4328484	17	69116230	A	G	CASC17	-0.0824	3.767e-09	EnR-Prn		0.3785	-0.0882501	0.0245943	0.0003379		0.3718	-0.0572756	0.0446868	0.2002		0.3883	-0.0664624	0.0224005	0.003024		0.3472	-0.118374	0.0321582	0.0002384
	rs4328484	17	69116230	A	G	CASC17	-0.0876	3.465e-10	Prn-EnL		0.3785	-0.089012	0.0247014	0.0003198		0.3718	-0.060677	0.0447635	0.1757		0.3883	-0.0751158	0.0222105	0.0007281		0.3472	-0.125157	0.0321227	0.0001005
	rs1014000	17	69121845	A	G	CASC17	0.1052	1.878e-08	Prn-EnL		0.4559	0.0996065	0.0238374	3.009e-05		NA	NA	NA	NA		NA	NA	NA	NA		0.4496	0.11425	0.0302115	0.0001601
	rs1013999	17	69121935	C	T	CASC17	0.1025	4.779e-08	Prn-EnL		0.4368	0.0951291	0.0239699	7.386e-05		NA	NA	NA	NA		NA	NA	NA	NA		0.4496	0.114218	0.0302051	0.0001598
	rs17824565	17	69122468	T	C	CASC17	0.103	4.18e-08	Prn-EnL		0.4368	0.0958858	0.0239793	6.535e-05		NA	NA	NA	NA		NA	NA	NA	NA		0.4496	0.11425	0.0302115	0.0001601
	rs17224666	17	69122480	A	C	CASC17	0.1034	3.728e-08	Prn-EnL		0.4368	0.0965164	0.0239825	5.852e-05		NA	NA	NA	NA		NA	NA	NA	NA		0.4496	0.11425	0.0302115	0.0001601
	rs9783828	17	69122693	T	C	CASC17	0.1039	3.22e-08	Prn-EnL		0.4367	0.0958858	0.0239793	6.535e-05		NA	NA	NA	NA		NA	NA	NA	NA		0.4483	0.116663	0.0302533	0.0001187
	rs9783825	17	69123014	G	A	CASC17	0.103	4.18e-08	Prn-EnL		0.4366	0.0958858	0.0239793	6.535e-05		NA	NA	NA	NA		NA	NA	NA	NA		0.4496	0.11425	0.0302115	0.0001601
	rs9302932	17	69123559	G	A	CASC17	0.1044	2.768e-08	Prn-EnL		0.4364	0.0968002	0.0239793	5.541e-05		NA	NA	NA	NA		NA	NA	NA	NA		0.4492	0.11647	0.0302469	0.0001213
	rs2367257	17	69123684	C	G	CASC17	0.1044	2.768e-08	Prn-EnL		0.4364	0.0968002	0.0239793	5.541e-05		NA	NA	NA	NA		NA	NA	NA	NA		0.4492	0.11647	0.0302469	0.0001213
	rs2886913	17	69123691	T	C	CASC17	0.1037	3.428e-08	Prn-EnL		0.4363	0.0956651	0.0239825	6.811e-05		NA	NA	NA	NA		NA	NA	NA	NA		0.4492	0.11647	0.0302469	0.0001213
	rs2367258	17	69123741	G	A	CASC17	0.1044	2.768e-08	Prn-EnL		0.4364	0.0968002	0.0239793	5.541e-05		NA	NA	NA	NA		NA	NA	NA	NA		0.4492	0.11647	0.0302469	0.0001213
	rs4793333	17	69124310	A	G	CASC17	0.1066	1.69e-08	Prn-EnL		0.4427	0.0991966	0.0241401	4.08e-05		NA	NA	NA	NA		NA	NA	NA	NA		0.448	0.118208	0.0303434	0.0001009
	rs8081862	17	69124420	T	C	CASC17	0.1044	2.768e-08	Prn-EnL		0.4366	0.0968002	0.0239793	5.541e-05		NA	NA	NA	NA		NA	NA	NA	NA		0.4492	0.11647	0.0302469	0.0001213
	rs111244787	17	69124474	CA	C	CASC17	0.1041	3.015e-08	Prn-EnL		0.4459	0.0967371	0.023973	5.593e-05		NA	NA	NA	NA		NA	NA	NA	NA		0.4494	0.115859	0.0302598	0.0001327
	rs6501439	17	69124884	G	A	CASC17	0.1044	2.768e-08	Prn-EnL		0.4363	0.0968002	0.0239793	5.541e-05		NA	NA	NA	NA		NA	NA	NA	NA		0.4492	0.11647	0.0302469	0.0001213
	rs6501440	17	69125032	T	C	CASC17	0.1045	2.703e-08	Prn-EnL		0.4363	0.0968002	0.0239793	5.541e-05		NA	NA	NA	NA		NA	NA	NA	NA		0.4487	0.116631	0.0302373	0.0001183
	rs6501441	17	69125086	A	G	CASC17	0.1044	2.768e-08	Prn-EnL		0.4362	0.0968002	0.0239793	5.541e-05		NA	NA	NA	NA		NA	NA	NA	NA		0.4492	0.11647	0.0302469	0.0001213
	rs6501442	17	69125142	T	G	CASC17	0.1044	2.768e-08	Prn-EnL		0.4362	0.0968002	0.0239793	5.541e-05		NA	NA	NA	NA		NA	NA	NA	NA		0.4492	0.11647	0.0302469	0.0001213
	rs6501443	17	69125157	C	G	CASC17	0.1044	2.768e-08	Prn-EnL		0.4362	0.0968002	0.0239793	5.541e-05		NA	NA	NA	NA		NA	NA	NA	NA		0.4492	0.11647	0.0302469	0.0001213
	rs4793530	17	69125263	C	T	CASC17	0.1044	2.768e-08	Prn-EnL		0.4362	0.0968002	0.0239793	5.541e-05		NA	NA	NA	NA		NA	NA	NA	NA		0.4492	0.11647	0.0302469	0.0001213
	rs7206958	17	69125507	C	T	CASC17	0.1042	2.929e-08	Prn-EnL		0.4362	0.0968002	0.0239793	5.541e-05		NA	NA	NA	NA		NA	NA	NA	NA		0.449	0.116084	0.0302694	0.0001293
	rs11654749	17	69125606	T	G	CASC17	-0.1006	1.73e-08	Prn-EnL		0.3966	-0.0977461	0.0246856	7.681e-05		0.4046	-0.0260753	0.0449106	0.5618		NA	NA	NA	NA		0.3729	-0.142242	0.0315982	7.096e-06
	rs8073978	17	69126953	C	T	CASC17	0.1042	2.948e-08	Prn-EnL		0.4361	0.0968002	0.0239793	5.541e-05		NA	NA	NA	NA		NA	NA	NA	NA		0.4489	0.116084	0.0302823	0.0001299
	rs8074021	17	69127020	C	A	CASC17	0.1052	2.246e-08	Prn-EnL		0.4361	0.0968002	0.0239793	5.541e-05		NA	NA	NA	NA		NA	NA	NA	NA		0.4478	0.11869	0.0303499	9.473e-05
	rs9908315	17	69127568	C	T	CASC17	0.1046	2.444e-08	Prn-EnL		0.4569	0.0975254	0.0238974	4.586e-05		NA	NA	NA	NA		NA	NA	NA	NA		0.4487	0.115988	0.0302727	0.0001307
	rs9906627	17	69127570	G	C	CASC17	0.1053	2.151e-08	Prn-EnL		0.4459	0.0985975	0.0240014	4.101e-05		NA	NA	NA	NA		NA	NA	NA	NA		0.4487	0.115988	0.0302727	0.0001307
	rs11871327	17	69127675	T	C	CASC17	-0.0846	1.126e-09	EnR-Prn		0.3965	-0.095012	0.0245565	0.0001112		0.4013	-0.0171864	0.0443923	0.6988		0.4097	-0.0681877	0.0222617	0.002205		0.3717	-0.134187	0.031549	2.195e-05
	rs11871327	17	69127675	T	C	CASC17	-0.0844	1.133e-09	Prn-EnL		0.3965	-0.0985975	0.024673	6.574e-05		0.4013	-0.0212572	0.0444328	0.6326		0.4097	-0.0616403	0.0220933	0.005304		0.3717	-0.139346	0.0315146	1.027e-05
	rs11868971	17	69127773	A	G	CASC17	0.1044	2.82e-08	Prn-EnL		0.4363	0.097084	0.0239919	5.328e-05		NA	NA	NA	NA		NA	NA	NA	NA		0.4489	0.116084	0.0302823	0.0001299
	rs34171878	17	69127821	A	T	CASC17	0.108	1.061e-08	Prn-EnL		0.4534	0.0994803	0.0238974	3.22e-05		NA	NA	NA	NA		NA	NA	NA	NA		0.459	0.122294	0.030826	7.525e-05
	rs56229089	17	69127852	G	C	CASC17	0.1091	7.842e-09	Prn-EnL		0.4529	0.100237	0.0239005	2.82e-05		NA	NA	NA	NA		NA	NA	NA	NA		0.4577	0.124063	0.0309226	6.242e-05
	rs55873433	17	69127974	T	C	CASC17	-0.1004	1.831e-08	Prn-EnL		0.3995	-0.0993542	0.0246604	5.737e-05		0.4069	-0.0216026	0.0449106	0.6307		NA	NA	NA	NA		0.3747	-0.140923	0.0315661	8.431e-06
	rs72866756	17	69128981	A	G	CASC17	-0.0836	1.773e-09	EnR-Prn		0.3976	-0.0929991	0.0245786	0.0001572		0.4032	-0.0263372	0.0443923	0.5532		0.4104	-0.0658622	0.0222508	0.003093		0.3739	-0.132858	0.0316236	2.762e-05
	rs72866756	17	69128981	A	G	CASC17	-0.0837	1.584e-09	Prn-EnL		0.3976	-0.0973047	0.0246951	8.332e-05		0.4032	-0.0298166	0.0444328	0.5025		0.4104	-0.0587338	0.0220804	0.007839		0.3739	-0.139925	0.0316111	1.006e-05
	rs28526842	17	69129072	A	T	CASC17	-0.0842	1.294e-09	EnR-Prn		0.3977	-0.0948547	0.0245503	0.0001139		0.4032	-0.0263372	0.0443923	0.5532		0.4103	-0.0661623	0.0222394	0.002944		0.3741	-0.131789	0.0314842	2.956e-05
	rs28526842	17	69129072	A	T	CASC17	-0.084	1.288e-09	Prn-EnL		0.3977	-0.0993542	0.0246667	5.759e-05		0.4032	-0.0298166	0.0444328	0.5025		0.4103	-0.0594132	0.0220703	0.007135		0.3741	-0.136354	0.0314502	1.52e-05
	rs11653132	17	69129832	T	G	CASC17	-0.0833	1.513e-09	EnR-Prn		0.4147	-0.101145	0.0243332	3.312e-05		0.4173	-0.0234771	0.0445395	0.5982		0.4286	-0.0629367	0.0220753	0.004376		0.392	-0.124693	0.0314064	7.417e-05
	rs11653132	17	69129832	T	G	CASC17	-0.0836	1.249e-09	Prn-EnL		0.4147	-0.104462	0.0244428	1.986e-05		0.4173	-0.0244472	0.0446165	0.5839		0.4286	-0.0591867	0.0218886	0.00689		0.392	-0.128632	0.0313794	4.29e-05
	rs11654295	17	69130538	A	G	CASC17	-0.0846	1.108e-09	EnR-Prn		0.3972	-0.0935967	0.0245565	0.0001408		0.4027	-0.0262894	0.0444291	0.5541		0.4098	-0.0667624	0.0222541	0.002717		0.372	-0.135062	0.0315717	1.962e-05
	rs11654295	17	69130538	A	G	CASC17	-0.0844	1.129e-09	Prn-EnL		0.3972	-0.0982822	0.024673	6.962e-05		0.4027	-0.029993	0.0444695	0.5001		0.4098	-0.0596774	0.0220864	0.006934		0.372	-0.139604	0.0315371	1.004e-05
	rs4398141	17	69130704	A	G	CASC17	-0.0842	1.291e-09	EnR-Prn		0.3977	-0.0948547	0.0245503	0.0001139		0.4033	-0.0262378	0.0444291	0.5549		0.4105	-0.0661623	0.0222245	0.002932		0.3741	-0.131789	0.0314842	2.956e-05
	rs4398141	17	69130704	A	G	CASC17	-0.0841	1.247e-09	Prn-EnL		0.3977	-0.0993542	0.0246667	5.759e-05		0.4033	-0.0298607	0.0444695	0.5021		0.4105	-0.0595642	0.0220608	0.006962		0.3741	-0.136354	0.0314502	1.52e-05
	rs4471727	17	69130716	A	T	CASC17	-0.0842	1.287e-09	EnR-Prn		0.3977	-0.0948547	0.0245503	0.0001139		0.4032	-0.0263372	0.0443923	0.5532		0.4105	-0.0661623	0.0222245	0.002932		0.3741	-0.131789	0.0314842	2.956e-05
	rs4471727	17	69130716	A	T	CASC17	-0.0841	1.251e-09	Prn-EnL		0.3977	-0.0993542	0.0246667	5.759e-05		0.4032	-0.0298166	0.0444328	0.5025		0.4105	-0.0595642	0.0220608	0.006962		0.3741	-0.136354	0.0314502	1.52e-05
	rs4300694	17	69130836	C	T	CASC17	-0.085	8.768e-10	EnR-Prn		0.3973	-0.0935967	0.0245565	0.0001408		0.4032	-0.029109	0.0443923	0.512		0.4105	-0.0672125	0.0222264	0.002513		0.3722	-0.135094	0.0315361	1.92e-05
	rs4300694	17	69130836	C	T	CASC17	-0.0851	7.882e-10	Prn-EnL		0.3973	-0.0982822	0.024673	6.962e-05		0.4032	-0.0330398	0.044396	0.4571		0.4105	-0.0607721	0.0220588	0.005902		0.3722	-0.139636	0.0314985	9.766e-06
	rs7501691	17	69131058	A	G	CASC17	-0.0849	9.284e-10	EnR-Prn		0.399	-0.0954208	0.0245471	0.0001034		0.405	-0.0319286	0.0442451	0.4707		0.4105	-0.0661623	0.0222245	0.002932		0.3741	-0.131789	0.0314842	2.956e-05
	rs7501691	17	69131058	A	G	CASC17	-0.0844	1.093e-09	Prn-EnL		0.399	-0.0993857	0.0246573	5.707e-05		0.405	-0.0326612	0.0444328	0.4626		0.4105	-0.0595642	0.0220608	0.006962		0.3741	-0.136354	0.0314502	1.52e-05
	rs2367260	17	69131305	C	T	CASC17	-0.1108	1.332e-08	Prn-EnL		0.3863	-0.0948137	0.0248464	0.0001382		NA	NA	NA	NA		NA	NA	NA	NA		0.3741	-0.136354	0.0314502	1.52e-05
	rs2367261	17	69131306	A	G	CASC17	-0.1115	1.09e-08	Prn-EnL		0.3857	-0.0944669	0.0248464	0.000146		NA	NA	NA	NA		NA	NA	NA	NA		0.3718	-0.138831	0.0314856	1.09e-05
	rs28523317	17	69131694	A	T	CASC17	-0.0841	1.293e-09	EnR-Prn		0.3977	-0.0948547	0.0245503	0.0001139		0.4032	-0.0262967	0.0442819	0.5528		0.4105	-0.0661623	0.0222245	0.002932		0.3741	-0.131789	0.0314842	2.956e-05
	rs28523317	17	69131694	A	T	CASC17	-0.0842	1.211e-09	Prn-EnL		0.3977	-0.0993542	0.0246667	5.759e-05		0.4032	-0.03057	0.044396	0.4911		0.4105	-0.0595642	0.0220608	0.006962		0.3741	-0.136354	0.0314502	1.52e-05
	rs8076830	17	69131909	T	C	CASC17	0.1053	2.337e-08	Prn-EnL		0.4339	0.0984713	0.024055	4.357e-05		NA	NA	NA	NA		NA	NA	NA	NA		0.4471	0.11631	0.0303917	0.0001336
	rs9906588	17	69132488	A	C	CASC17	0.1047	2.835e-08	Prn-EnL		0.4341	0.0973678	0.0240361	5.213e-05		NA	NA	NA	NA		NA	NA	NA	NA		0.4471	0.11631	0.0303917	0.0001336
	rs4793531	17	69133307	T	C	CASC17	-0.0916	3.669e-10	EnR-Prn		0.3931	-0.0985659	0.0246509	6.54e-05		NA	NA	NA	NA		0.4104	-0.0663123	0.0222226	0.002864		0.3739	-0.131044	0.0314745	3.248e-05
	rs4793531	17	69133307	T	C	CASC17	-0.0912	3.985e-10	Prn-EnL		0.3931	-0.103642	0.0247676	2.935e-05		NA	NA	NA	NA		0.4104	-0.0592622	0.022047	0.007215		0.3739	-0.136257	0.0314341	1.529e-05
	rs11656229	17	69134043	A	T	CASC17	-0.0847	1.116e-09	EnR-Prn		0.3976	-0.0948547	0.0245943	0.0001172		0.3955	-0.0411163	0.0453125	0.3641		0.4113	-0.0641369	0.0222158	0.00391		0.3744	-0.130136	0.031455	3.65e-05
	rs11656229	17	69134043	A	T	CASC17	-0.0852	8.393e-10	Prn-EnL		0.3976	-0.100584	0.0247109	4.792e-05		0.3955	-0.0421542	0.0454618	0.3538		0.4113	-0.0585828	0.0220485	0.007924		0.3744	-0.134842	0.0314213	1.856e-05
	rs28690329	17	69134554	T	C	CASC17	-0.085	8.735e-10	EnR-Prn		0.3976	-0.0960813	0.0245597	9.363e-05		0.4032	-0.0262967	0.0442819	0.5528		0.4104	-0.0663123	0.0222226	0.002864		0.3743	-0.133733	0.0314356	2.185e-05
	rs28690329	17	69134554	T	C	CASC17	-0.0849	8.714e-10	Prn-EnL		0.3976	-0.100363	0.0246762	4.869e-05		0.4032	-0.03057	0.044396	0.4911		0.4104	-0.0592622	0.022047	0.007215		0.3743	-0.138799	0.0313987	1.033e-05
	rs28579305	17	69134697	C	G	CASC17	-0.1101	1.52e-08	Prn-EnL		0.3894	-0.0929534	0.0247708	0.0001784		NA	NA	NA	NA		NA	NA	NA	NA		0.3749	-0.137544	0.0313987	1.239e-05
	rs11656479	17	69134717	C	T	CASC17	-0.1066	3.992e-08	EnR-Prn		0.3894	-0.0886904	0.0246635	0.0003279		NA	NA	NA	NA		NA	NA	NA	NA		0.3731	-0.135807	0.031481	1.671e-05
	rs11656479	17	69134717	C	T	CASC17	-0.1124	7.787e-09	Prn-EnL		0.3894	-0.09453	0.0247771	0.0001391		NA	NA	NA	NA		NA	NA	NA	NA		0.3731	-0.141084	0.0314502	7.646e-06
	rs11656520	17	69135026	G	A	CASC17	-0.0834	1.758e-09	EnR-Prn		0.3981	-0.0941942	0.0245628	0.0001282		0.4035	-0.0264771	0.0442819	0.5499		0.4113	-0.0641369	0.0222158	0.00391		0.3747	-0.132988	0.0314194	2.401e-05
	rs11656520	17	69135026	G	A	CASC17	-0.0841	1.192e-09	Prn-EnL		0.3981	-0.099638	0.0246762	5.52e-05		0.4035	-0.030695	0.0443593	0.4891		0.4113	-0.0585828	0.0220485	0.007924		0.3747	-0.137641	0.0313827	1.213e-05
	rs9902159	17	69135357	G	A	CASC17	-0.0837	1.528e-09	EnR-Prn		0.3981	-0.0941942	0.0245628	0.0001282		0.4035	-0.0264771	0.0442819	0.5499		0.4112	-0.0649621	0.0222245	0.003483		0.3747	-0.132988	0.0314194	2.401e-05
	rs9902159	17	69135357	G	A	CASC17	-0.0843	1.099e-09	Prn-EnL		0.3981	-0.099638	0.0246762	5.52e-05		0.4035	-0.030695	0.0443593	0.4891		0.4112	-0.0590358	0.0220447	0.007437		0.3747	-0.137641	0.0313827	1.213e-05
	rs9900242	17	69135631	A	G	CASC17	-0.0839	1.415e-09	EnR-Prn		0.3981	-0.0941942	0.0245628	0.0001282		0.4035	-0.0264771	0.0442819	0.5499		0.4111	-0.0652246	0.022223	0.003361		0.3749	-0.133183	0.0313935	2.303e-05
	rs9900242	17	69135631	A	G	CASC17	-0.0846	9.812e-10	Prn-EnL		0.3981	-0.099638	0.0246762	5.52e-05		0.4035	-0.030695	0.0443593	0.4891		0.4111	-0.0593377	0.0220586	0.007188		0.3749	-0.13822	0.0313601	1.094e-05
	rs11653076	17	69136189	A	C	CASC17	-0.0858	6.21e-10	EnR-Prn		0.3971	-0.0948232	0.0245691	0.000116		0.4029	-0.0264771	0.0442819	0.5499		0.4101	-0.067325	0.0222342	0.002475		0.3721	-0.137881	0.0314745	1.239e-05
	rs11653076	17	69136189	A	C	CASC17	-0.0854	6.833e-10	Prn-EnL		0.3971	-0.0992912	0.0246825	5.897e-05		0.4029	-0.030695	0.0443593	0.4891		0.4101	-0.0599794	0.0220594	0.006581		0.3721	-0.142145	0.0314438	6.48e-06
	rs59674517	17	69136395	T	TAA	CASC17	0.1028	4.333e-08	Prn-EnL		0.454	0.0912507	0.0240424	0.0001504		NA	NA	NA	NA		NA	NA	NA	NA		0.4669	0.120975	0.03007	5.937e-05
	rs11077549	17	69137308	C	T	CASC17	-0.0862	5.442e-10	EnR-Prn		0.3976	-0.0960813	0.0245597	9.363e-05		0.4034	-0.0263004	0.0443555	0.5534		0.4113	-0.0686753	0.0223189	0.002104		0.3744	-0.13477	0.0314388	1.889e-05
	rs11077549	17	69137308	C	T	CASC17	-0.0856	6.61e-10	Prn-EnL		0.3976	-0.100363	0.0246762	4.869e-05		0.4034	-0.0277549	0.044396	0.5321		0.4113	-0.0612628	0.0221565	0.005714		0.3744	-0.1397	0.0314084	9.091e-06
	rs9908442	17	69137948	A	G	CASC17	-0.0868	4.033e-10	EnR-Prn		0.3977	-0.0973393	0.0245534	7.504e-05		0.4035	-0.0256562	0.0443555	0.5631		0.4111	-0.0694629	0.0222995	0.001854		0.3743	-0.13477	0.031455	1.913e-05
	rs9908442	17	69137948	A	G	CASC17	-0.0862	4.989e-10	Prn-EnL		0.3977	-0.101561	0.0246699	3.937e-05		0.4035	-0.0271301	0.044396	0.5414		0.4111	-0.0620555	0.0221469	0.005098		0.3743	-0.139668	0.0314277	9.278e-06
	rs4793334	17	69137982	T	A	CASC17	-0.0865	4.733e-10	EnR-Prn		0.3975	-0.0960813	0.0245597	9.363e-05		0.4031	-0.0261164	0.0443555	0.5563		0.4111	-0.0694629	0.0222995	0.001854		0.3744	-0.13477	0.0314388	1.889e-05
	rs4793334	17	69137982	T	A	CASC17	-0.0859	5.743e-10	Prn-EnL		0.3975	-0.100363	0.0246762	4.869e-05		0.4031	-0.0276299	0.0444328	0.5342		0.4111	-0.0620555	0.0221469	0.005098		0.3744	-0.1397	0.0314084	9.091e-06
	rs17178034	17	69138243	T	C	CASC17	-0.0862	5.367e-10	EnR-Prn		0.3975	-0.0960813	0.0245597	9.363e-05		0.4028	-0.0228072	0.0443923	0.6075		0.4111	-0.0694629	0.0222995	0.001854		0.3745	-0.13503	0.0314421	1.829e-05
	rs17178034	17	69138243	T	C	CASC17	-0.0856	6.625e-10	Prn-EnL		0.3975	-0.100363	0.0246762	4.869e-05		0.4028	-0.0240356	0.0444328	0.5887		0.4111	-0.0620555	0.0221469	0.005098		0.3745	-0.139893	0.0314084	8.826e-06
	rs17178041	17	69138255	A	G	CASC17	-0.0866	4.532e-10	EnR-Prn		0.3971	-0.0948232	0.0245691	0.000116		0.4023	-0.0228072	0.0443923	0.6075		0.411	-0.0698755	0.0222959	0.001738		0.3724	-0.138659	0.0315166	1.14e-05
	rs17178041	17	69138255	A	G	CASC17	-0.0861	5.349e-10	Prn-EnL		0.3971	-0.0992912	0.0246825	5.897e-05		0.4023	-0.0240356	0.0444328	0.5887		0.411	-0.0626217	0.0221356	0.004691		0.3724	-0.143368	0.0314824	5.558e-06
	rs2058083	17	69138403	T	C	CASC17	-0.0864	4.983e-10	EnR-Prn		0.3975	-0.0960813	0.0245597	9.363e-05		0.4027	-0.0228072	0.0443923	0.6075		0.4111	-0.0694629	0.0222995	0.001854		0.3746	-0.135937	0.031455	1.621e-05
	rs2058083	17	69138403	T	C	CASC17	-0.0857	6.323e-10	Prn-EnL		0.3975	-0.100363	0.0246762	4.869e-05		0.4027	-0.0240356	0.0444328	0.5887		0.4111	-0.0620555	0.0221469	0.005098		0.3746	-0.140537	0.0314277	8.142e-06
	rs2058084	17	69139017	T	C	CASC17	-0.0851	9.113e-10	EnR-Prn		0.3979	-0.0941942	0.0245628	0.0001282		0.4032	-0.0239225	0.0444659	0.5907		0.412	-0.0672875	0.0223102	0.002578		0.3757	-0.135904	0.0314324	1.606e-05
	rs2058084	17	69139017	T	C	CASC17	-0.0853	7.522e-10	Prn-EnL		0.3979	-0.099638	0.0246762	5.52e-05		0.4032	-0.0247229	0.0445063	0.5788		0.412	-0.0613006	0.0221382	0.005655		0.3757	-0.140794	0.0314148	7.796e-06
	rs2058085	17	69139047	C	A	CASC17	-0.0855	7.645e-10	EnR-Prn		0.3975	-0.0929362	0.0245691	0.0001583		0.4028	-0.0239667	0.0445027	0.5902		0.4119	-0.0677001	0.0223065	0.002421		0.3739	-0.139437	0.0314842	9.964e-06
	rs2058085	17	69139047	C	A	CASC17	-0.0859	6.012e-10	Prn-EnL		0.3975	-0.0985659	0.0246825	6.677e-05		0.4028	-0.0244987	0.0445063	0.5822		0.4119	-0.0619045	0.0221404	0.005208		0.3739	-0.144333	0.0314663	4.761e-06
	rs58506674	17	69139272	G	T	CASC17	-0.0851	9.083e-10	EnR-Prn		0.3979	-0.0941942	0.0245628	0.0001282		0.4032	-0.0239667	0.0445027	0.5902		0.412	-0.0672875	0.0223102	0.002578		0.3757	-0.135904	0.0314324	1.606e-05
	rs58506674	17	69139272	G	T	CASC17	-0.0853	7.597e-10	Prn-EnL		0.3979	-0.099638	0.0246762	5.52e-05		0.4032	-0.0244987	0.0445063	0.5822		0.412	-0.0613006	0.0221382	0.005655		0.3757	-0.140794	0.0314148	7.796e-06
	rs11654896	17	69139331	G	A	CASC17	-0.0851	9.083e-10	EnR-Prn		0.3979	-0.0941942	0.0245628	0.0001282		0.4032	-0.0239667	0.0445027	0.5902		0.412	-0.0672875	0.0223102	0.002578		0.3757	-0.135904	0.0314324	1.606e-05
	rs11654896	17	69139331	G	A	CASC17	-0.0853	7.597e-10	Prn-EnL		0.3979	-0.099638	0.0246762	5.52e-05		0.4032	-0.0244987	0.0445063	0.5822		0.412	-0.0613006	0.0221382	0.005655		0.3757	-0.140794	0.0314148	7.796e-06
	rs11655964	17	69139352	C	T	CASC17	-0.0886	1.445e-09	EnR-Prn		0.3884	-0.0856397	0.0247138	0.000536		NA	NA	NA	NA		0.412	-0.0672875	0.0223102	0.002578		0.3757	-0.135904	0.0314324	1.606e-05
	rs11655964	17	69139352	C	T	CASC17	-0.0901	7.238e-10	Prn-EnL		0.3884	-0.094593	0.0248149	0.0001402		NA	NA	NA	NA		0.412	-0.0613006	0.0221382	0.005655		0.3757	-0.140794	0.0314148	7.796e-06
	rs11655006	17	69139583	G	A	CASC17	-0.09	7.79e-10	EnR-Prn		0.3918	-0.0882815	0.02461	0.0003397		NA	NA	NA	NA		0.4125	-0.0679626	0.0223121	0.002333		0.3757	-0.136293	0.0314194	1.507e-05
	rs11655006	17	69139583	G	A	CASC17	-0.0899	7.488e-10	Prn-EnL		0.3918	-0.0929534	0.0247266	0.0001735		NA	NA	NA	NA		0.4125	-0.0620177	0.0221571	0.005155		0.3757	-0.141084	0.0314084	7.437e-06
	rs59181466	17	69140220	G	A	CASC17	-0.0853	8.812e-10	EnR-Prn		0.3972	-0.0927475	0.0245786	0.0001639		0.4013	-0.0278354	0.0448708	0.5351		0.4125	-0.0679626	0.0223121	0.002333		0.3766	-0.135645	0.0314842	1.717e-05
	rs59181466	17	69140220	G	A	CASC17	-0.0853	8.087e-10	Prn-EnL		0.3972	-0.0993857	0.0246919	5.825e-05		0.4013	-0.0231278	0.0448371	0.606		0.4125	-0.0620177	0.0221571	0.005155		0.3766	-0.140215	0.0314856	8.899e-06
	rs11657344	17	69140466	C	T	CASC17	-0.0858	6.699e-10	EnR-Prn		0.3976	-0.0924016	0.0245471	0.0001702		0.4033	-0.0251004	0.0445395	0.5733		0.4122	-0.0689753	0.0223149	0.00201		0.3744	-0.138853	0.0315296	1.112e-05
	rs11657344	17	69140466	C	T	CASC17	-0.0856	7.091e-10	Prn-EnL		0.3976	-0.0983452	0.0246604	6.807e-05		0.4033	-0.0223965	0.0445798	0.6155		0.4122	-0.0626972	0.0221545	0.004686		0.3744	-0.142564	0.0315339	6.481e-06
	rs7216323	17	69140933	G	C	CASC17	-0.0898	8.505e-10	EnR-Prn		0.3957	-0.0881557	0.024632	0.0003504		NA	NA	NA	NA		0.4125	-0.0680376	0.0223147	0.00231		0.3758	-0.135807	0.0314648	1.66e-05
	rs7216323	17	69140933	G	C	CASC17	-0.0904	6.124e-10	Prn-EnL		0.3957	-0.0951921	0.0247455	0.0001222		NA	NA	NA	NA		0.4125	-0.0620555	0.0221469	0.005103		0.3758	-0.139925	0.0314567	9.087e-06
	rs7221230	17	69140950	C	T	CASC17	-0.0896	9.119e-10	EnR-Prn		0.3959	-0.0876525	0.0246194	0.0003763		NA	NA	NA	NA		0.4125	-0.0680376	0.0223147	0.00231		0.3758	-0.135807	0.0314648	1.66e-05
	rs7221230	17	69140950	C	T	CASC17	-0.0901	6.958e-10	Prn-EnL		0.3959	-0.0943093	0.0247361	0.0001403		NA	NA	NA	NA		0.4125	-0.0620555	0.0221469	0.005103		0.3758	-0.139925	0.0314567	9.087e-06
	rs9907587	17	69141711	T	C	CASC17	-0.085	9.785e-10	EnR-Prn		0.3982	-0.0925903	0.0245345	0.0001633		0.402	-0.0286341	0.0447236	0.522		0.412	-0.0669499	0.0223315	0.002739		0.3759	-0.136229	0.0314939	1.59e-05
	rs9907587	17	69141711	T	C	CASC17	-0.0845	1.162e-09	Prn-EnL		0.3982	-0.0986605	0.0246478	6.389e-05		0.402	-0.0209668	0.0447268	0.6394		0.412	-0.0609986	0.0221571	0.005929		0.3759	-0.140118	0.0314856	8.996e-06
	rs17178062	17	69142191	G	A	CASC17	-0.0852	8.814e-10	EnR-Prn		0.3983	-0.0925903	0.0245345	0.0001633		0.4038	-0.0251004	0.0445395	0.5733		0.4125	-0.0681127	0.0223101	0.002286		0.3761	-0.137006	0.0315231	1.448e-05
	rs17178062	17	69142191	G	A	CASC17	-0.0851	8.817e-10	Prn-EnL		0.3983	-0.0986605	0.0246478	6.389e-05		0.4038	-0.0223965	0.0445798	0.6155		0.4125	-0.062131	0.0221501	0.005054		0.3761	-0.140569	0.0315274	8.679e-06
	rs9915190	17	69142628	A	C	CASC17	-0.0864	4.975e-10	EnR-Prn		0.3979	-0.0944773	0.0245314	0.0001198		0.4035	-0.0251004	0.0445395	0.5733		0.4117	-0.0694629	0.0223138	0.001865		0.3756	-0.137752	0.0315393	1.314e-05
	rs9915190	17	69142628	A	C	CASC17	-0.0856	6.935e-10	Prn-EnL		0.3979	-0.0993857	0.0246478	5.642e-05		0.4035	-0.0223965	0.0445798	0.6155		0.4117	-0.0623575	0.0221519	0.004897		0.3756	-0.141759	0.0315435	7.367e-06
	rs2159036	17	69143664	C	A	CASC17	-0.0866	4.764e-10	EnR-Prn		0.3984	-0.0925274	0.0245565	0.0001672		0.4053	-0.0296538	0.0445395	0.5059		0.4131	-0.0680752	0.0223124	0.002295		0.3749	-0.142742	0.0316398	6.789e-06
	rs2159036	17	69143664	C	A	CASC17	-0.0868	4.188e-10	Prn-EnL		0.3984	-0.0980614	0.0246699	7.19e-05		0.4053	-0.0274976	0.04469	0.5386		0.4131	-0.0625839	0.0221615	0.004766		0.3749	-0.147325	0.0316304	3.396e-06
	rs2041113	17	69144192	T	C	CASC17	-0.0869	4.11e-10	EnR-Prn		0.3974	-0.0943829	0.0245565	0.0001238		0.4035	-0.0299666	0.0444659	0.5003		0.4119	-0.0682252	0.022325	0.002259		0.3737	-0.140862	0.0316268	8.885e-06
	rs2041113	17	69144192	T	C	CASC17	-0.0859	6.114e-10	Prn-EnL		0.3974	-0.0988812	0.024673	6.285e-05		0.4035	-0.0254689	0.0445798	0.5679		0.4119	-0.0614138	0.022155	0.005597		0.3737	-0.145105	0.031624	4.735e-06
	rs2041114	17	69144617	A	G	CASC17	0.076	2.826e-08	EnR-Prn		0.4352	0.0845389	0.0239307	0.0004178		0.4234	0.0598155	0.0443923	0.1782		0.4142	0.0507469	0.0224147	0.02361		0.4494	0.11617	0.0303112	0.0001303
	rs2041114	17	69144617	A	G	CASC17	0.0804	4.074e-09	Prn-EnL		0.4352	0.096548	0.0240455	6.075e-05		0.4234	0.0415662	0.0446165	0.3517		0.4142	0.0550724	0.0222335	0.0133		0.4494	0.119913	0.030292	7.788e-05
	rs723338	17	69145413	A	G	CASC17	0.0768	2.127e-08	EnR-Prn		0.4355	0.0853881	0.0239496	0.0003694		0.424	0.0638277	0.0445027	0.152		0.4148	0.0499218	0.0224065	0.02594		0.4501	0.118114	0.0303468	0.0001025
	rs723338	17	69145413	A	G	CASC17	0.0802	4.706e-09	Prn-EnL		0.4355	0.0950975	0.0240676	7.925e-05		0.424	0.043073	0.0447268	0.336		0.4148	0.0546571	0.0222184	0.01394		0.4501	0.121007	0.0303273	6.823e-05
	rs956219	17	69145707	G	A	CASC17	0.0767	2.205e-08	EnR-Prn		0.4355	0.0853881	0.0239496	0.0003694		0.4238	0.0633492	0.0445027	0.1548		0.4144	0.0495092	0.0224328	0.02737		0.4499	0.118633	0.0303306	9.472e-05
	rs956219	17	69145707	G	A	CASC17	0.0801	5.036e-09	Prn-EnL		0.4355	0.0950975	0.0240676	7.925e-05		0.4238	0.0429995	0.04469	0.3362		0.4144	0.0542797	0.022264	0.0148		0.4499	0.121007	0.0303113	6.763e-05
	rs28703253	17	69145804	G	T	CASC17	0.0767	2.205e-08	EnR-Prn		0.4355	0.0853881	0.0239496	0.0003694		0.4238	0.0633492	0.0445027	0.1548		0.4144	0.0495092	0.0224328	0.02737		0.4499	0.118633	0.0303306	9.472e-05
	rs28703253	17	69145804	G	T	CASC17	0.0801	5.036e-09	Prn-EnL		0.4355	0.0950975	0.0240676	7.925e-05		0.4238	0.0429995	0.04469	0.3362		0.4144	0.0542797	0.022264	0.0148		0.4499	0.121007	0.0303113	6.763e-05
	rs28514850	17	69146036	T	C	CASC17	0.0764	2.527e-08	EnR-Prn		0.4355	0.0853881	0.0239496	0.0003694		0.4239	0.0633492	0.0445027	0.1548		0.4144	0.0495092	0.0224328	0.02737		0.4496	0.117077	0.0303371	0.0001174
	rs28514850	17	69146036	T	C	CASC17	0.0798	5.741e-09	Prn-EnL		0.4355	0.0950975	0.0240676	7.925e-05		0.4239	0.0429995	0.04469	0.3362		0.4144	0.0542797	0.022264	0.0148		0.4496	0.119591	0.0303209	8.249e-05
	rs8081602	17	69146079	A	G	CASC17	0.0767	2.205e-08	EnR-Prn		0.4355	0.0853881	0.0239496	0.0003694		0.4239	0.0633492	0.0445027	0.1548		0.4144	0.0495092	0.0224328	0.02737		0.4499	0.118633	0.0303306	9.472e-05
	rs8081602	17	69146079	A	G	CASC17	0.0801	5.036e-09	Prn-EnL		0.4355	0.0950975	0.0240676	7.925e-05		0.4239	0.0429995	0.04469	0.3362		0.4144	0.0542797	0.022264	0.0148		0.4499	0.121007	0.0303113	6.763e-05
	rs8081751	17	69146168	A	C	CASC17	0.0763	2.581e-08	EnR-Prn		0.4351	0.0865203	0.023937	0.0003051		0.4234	0.0633492	0.0445027	0.1548		0.4143	0.0491341	0.0224562	0.02871		0.4478	0.115425	0.0302917	0.0001427
	rs8081751	17	69146168	A	C	CASC17	0.0796	6.186e-09	Prn-EnL		0.4351	0.0961065	0.024055	6.622e-05		0.4234	0.0429995	0.04469	0.3362		0.4143	0.0537135	0.0222693	0.01591		0.4478	0.117854	0.0302694	0.0001018
	rs8080184	17	69146243	G	A	CASC17	0.0767	2.205e-08	EnR-Prn		0.4355	0.0853881	0.0239496	0.0003694		0.4239	0.0633492	0.0445027	0.1548		0.4144	0.0495092	0.0224328	0.02737		0.4499	0.118633	0.0303306	9.472e-05
	rs8080184	17	69146243	G	A	CASC17	0.0801	5.036e-09	Prn-EnL		0.4355	0.0950975	0.0240676	7.925e-05		0.4239	0.0429995	0.04469	0.3362		0.4144	0.0542797	0.022264	0.0148		0.4499	0.121007	0.0303113	6.763e-05
	rs2041115	17	69146427	A	T	CASC17	0.0767	2.205e-08	EnR-Prn		0.4355	0.0853881	0.0239496	0.0003694		0.424	0.0633492	0.0445027	0.1548		0.4144	0.0495092	0.0224328	0.02737		0.4499	0.118633	0.0303306	9.472e-05
	rs2041115	17	69146427	A	T	CASC17	0.0801	5.036e-09	Prn-EnL		0.4355	0.0950975	0.0240676	7.925e-05		0.424	0.0429995	0.04469	0.3362		0.4144	0.0542797	0.022264	0.0148		0.4499	0.121007	0.0303113	6.763e-05
	rs8064263	17	69146830	A	T	CASC17	0.0774	1.604e-08	EnR-Prn		0.435	0.0865203	0.023937	0.0003051		0.4235	0.0699749	0.0443555	0.1152		0.4142	0.0505969	0.0224775	0.02442		0.4484	0.114615	0.0301848	0.0001508
	rs8064263	17	69146830	A	T	CASC17	0.0804	4.174e-09	Prn-EnL		0.435	0.0961065	0.024055	6.622e-05		0.4235	0.0506438	0.0445798	0.2563		0.4142	0.0545817	0.0222964	0.01439		0.4484	0.116631	0.0301633	0.0001133
	rs9897865	17	69147076	C	A	CASC17	0.0767	2.17e-08	EnR-Prn		0.435	0.0865203	0.023937	0.0003051		0.4235	0.0634596	0.0445027	0.1541		0.4141	0.0501843	0.0224639	0.02557		0.4475	0.114809	0.0301556	0.0001442
	rs9897865	17	69147076	C	A	CASC17	0.0798	5.419e-09	Prn-EnL		0.435	0.0961065	0.024055	6.622e-05		0.4235	0.043367	0.0447635	0.3327		0.4141	0.0545062	0.0222838	0.01449		0.4475	0.117017	0.0301279	0.0001058
	rs9897358	17	69147542	G	A	CASC17	0.0773	1.635e-08	EnR-Prn		0.4349	0.0865203	0.023937	0.0003051		0.4234	0.0702326	0.0443555	0.1136		0.4143	0.0500343	0.022447	0.02588		0.4482	0.114971	0.0301329	0.0001399
	rs9897358	17	69147542	G	A	CASC17	0.0806	3.687e-09	Prn-EnL		0.4349	0.0961065	0.024055	6.622e-05		0.4234	0.0507908	0.0445798	0.2546		0.4143	0.0545062	0.0222656	0.0144		0.4482	0.117693	0.0301053	9.551e-05
	rs9906121	17	69147746	T	G	CASC17	0.0776	1.366e-08	EnR-Prn		0.4349	0.0865203	0.023937	0.0003051		0.4231	0.0703798	0.0443555	0.1129		0.4143	0.0500343	0.022447	0.02588		0.447	0.116397	0.030026	0.0001093
	rs9906121	17	69147746	T	G	CASC17	0.0807	3.385e-09	Prn-EnL		0.4349	0.0961065	0.024055	6.622e-05		0.4231	0.0511216	0.044543	0.2514		0.4143	0.0545062	0.0222656	0.0144		0.447	0.117886	0.0299927	8.731e-05
	rs9900302	17	69147780	A	G	CASC17	0.0773	1.61e-08	EnR-Prn		0.4349	0.0865203	0.023937	0.0003051		0.4231	0.0714105	0.0443923	0.1081		0.4143	0.0500343	0.022447	0.02588		0.4473	0.11468	0.0301427	0.0001459
	rs9900302	17	69147780	A	G	CASC17	0.0807	3.642e-09	Prn-EnL		0.4349	0.0961065	0.024055	6.622e-05		0.4231	0.0521139	0.0445798	0.2427		0.4143	0.0545062	0.0222656	0.0144		0.4473	0.117275	0.030115	0.0001015
	rs11651469	17	69148519	T	G	CASC17	0.0765	1.973e-08	EnR-Prn		0.4539	0.0771795	0.0239558	0.00129		0.4389	0.0778522	0.0443555	0.07948		0.4327	0.0509345	0.0223006	0.02246		0.4655	0.120772	0.0298607	5.424e-05
	rs11651469	17	69148519	T	G	CASC17	0.08	4.288e-09	Prn-EnL		0.4539	0.0905571	0.0240739	0.0001718		0.4389	0.0566711	0.0445798	0.2038		0.4327	0.0522414	0.0221268	0.01828		0.4655	0.124514	0.0298383	3.121e-05
	rs11651501	17	69148558	T	A	CASC17	0.0759	2.498e-08	EnR-Prn		0.4545	0.0767392	0.023937	0.001359		0.4396	0.080981	0.0443923	0.06828		0.4331	0.0505219	0.022276	0.02339		0.4662	0.117952	0.0298543	8.022e-05
	rs11651501	17	69148558	T	A	CASC17	0.0792	5.967e-09	Prn-EnL		0.4545	0.0906832	0.024055	0.0001661		0.4396	0.0586924	0.0446165	0.1886		0.4331	0.0512222	0.0220976	0.0205		0.4662	0.12149	0.0298351	4.829e-05
	rs72866795	17	69148917	C	T	CASC17	-0.0743	4.549e-08	EnR-Prn		0.4742	-0.0821487	0.0238238	0.0005727		0.4697	-0.0539628	0.0441714	0.2222		0.4847	-0.0480089	0.0220629	0.02963		0.4462	-0.120707	0.0303014	7.026e-05
	rs9899201	17	69149543	G	C	CASC17	0.0759	2.678e-08	EnR-Prn		0.4539	0.0771795	0.0239558	0.00129		0.4392	0.0781467	0.0443923	0.07861		0.4331	0.0498093	0.0223761	0.02606		0.4653	0.119411	0.0298705	6.595e-05
	rs9899201	17	69149543	G	C	CASC17	0.0783	9.102e-09	Prn-EnL		0.4539	0.0905571	0.0240739	0.0001718		0.4392	0.0567813	0.0446165	0.2034		0.4331	0.0489574	0.0221928	0.02743		0.4653	0.122262	0.0298286	4.307e-05
	rs2058086	17	69151198	T	G	CASC17	0.0756	3.527e-08	EnR-Prn		0.4352	0.0865203	0.023937	0.0003051		0.4245	0.0647848	0.0445027	0.1457		0.4144	0.048534	0.022532	0.03134		0.4467	0.112055	0.0302366	0.0002163
	rs2058086	17	69151198	T	G	CASC17	0.0778	1.34e-08	Prn-EnL		0.4352	0.0961065	0.024055	6.622e-05		0.4245	0.0449106	0.0447635	0.3159		0.4144	0.051109	0.0223378	0.0222		0.4467	0.112803	0.0301922	0.0001917
	rs9909762	17	69159489	C	T	CASC17	0.0811	1.667e-08	Prn-EnL		0.4486	0.0958543	0.0240172	6.722e-05		NA	NA	NA	NA		0.4139	0.0523923	0.0223231	0.019		0.4455	0.110325	0.03016	0.00026
	rs9910829	17	69159577	A	G	CASC17	0.0753	4.02e-08	EnR-Prn		0.435	0.0864574	0.0239496	0.0003117		0.4251	0.0686866	0.0443923	0.122		0.4138	0.0486465	0.0225529	0.03104		0.4455	0.108555	0.030214	0.0003343
	rs9910829	17	69159577	A	G	CASC17	0.078	1.225e-08	Prn-EnL		0.435	0.0959489	0.0240676	6.861e-05		0.4251	0.0479977	0.0447268	0.2836		0.4138	0.0523546	0.0223356	0.01913		0.4455	0.110325	0.03016	0.00026
	rs7220274	17	69159767	A	G	CASC17	0.0752	4.292e-08	EnR-Prn		0.4352	0.0864574	0.0239496	0.0003117		0.425	0.067251	0.0443555	0.1298		0.4138	0.0486465	0.0225529	0.03104		0.4455	0.108425	0.030214	0.00034
	rs7220274	17	69159767	A	G	CASC17	0.0779	1.287e-08	Prn-EnL		0.4352	0.0959489	0.0240676	6.861e-05		0.425	0.0469319	0.04469	0.2941		0.4138	0.0523546	0.0223356	0.01913		0.4455	0.110261	0.0301633	0.0002631
	rs28519385	17	69160306	A	T	CASC17	0.0749	4.777e-08	EnR-Prn		0.4356	0.0852937	0.0239621	0.0003774		0.4256	0.0714105	0.0443923	0.108		0.4141	0.0492467	0.0225385	0.02893		0.4516	0.106514	0.0303079	0.0004488
	rs28519385	17	69160306	A	T	CASC17	0.0775	1.558e-08	Prn-EnL		0.4356	0.0949714	0.0240802	8.21e-05		0.4256	0.048843	0.0446533	0.2743		0.4141	0.053185	0.0223373	0.01734		0.4516	0.10788	0.0302855	0.0003767
	rs17224833	17	69160475	A	T	CASC17	0.0759	3.242e-08	EnR-Prn		0.4355	0.0852937	0.0239621	0.0003774		0.4255	0.0714105	0.0443923	0.108		0.4141	0.0492467	0.0225385	0.02893		0.4475	0.110856	0.0302593	0.000255
	rs17224833	17	69160475	A	T	CASC17	0.0786	9.809e-09	Prn-EnL		0.4355	0.0949714	0.0240802	8.21e-05		0.4255	0.048843	0.0446533	0.2743		0.4141	0.053185	0.0223373	0.01734		0.4475	0.11277	0.0302051	0.0001938
	rs2108534	17	69160900	A	T	CASC17	0.0758	3.247e-08	EnR-Prn		0.4353	0.0864574	0.0239496	0.0003117		0.4251	0.0714105	0.0443923	0.108		0.4141	0.0498468	0.0225347	0.02701		0.4457	0.10768	0.0302302	0.0003759
	rs2108534	17	69160900	A	T	CASC17	0.0781	1.195e-08	Prn-EnL		0.4353	0.0959489	0.0240676	6.861e-05		0.4251	0.048843	0.0446533	0.2743		0.4141	0.0526943	0.0223281	0.01834		0.4457	0.109649	0.0301761	0.0002856
	rs8182284	17	69161391	A	T	CASC17	-0.0749	3.689e-08	EnR-Prn		0.4753	-0.0822116	0.0238646	0.0005792		0.4698	-0.0600364	0.0441346	0.1737		0.4859	-0.0469587	0.0221086	0.03377		0.4474	-0.122262	0.0302528	5.506e-05
	rs8182286	17	69161554	T	C	CASC17	0.0757	3.445e-08	EnR-Prn		0.4353	0.0869606	0.0239401	0.0002858		0.4251	0.0714105	0.0443923	0.108		0.4145	0.0489466	0.0225353	0.02992		0.4457	0.107713	0.0302237	0.0003734
	rs8182286	17	69161554	T	C	CASC17	0.0779	1.275e-08	Prn-EnL		0.4353	0.0961381	0.0240582	6.584e-05		0.4251	0.048843	0.0446533	0.2743		0.4145	0.0520904	0.0223276	0.01969		0.4457	0.109617	0.0301697	0.0002861
	rs10712335	17	69164251	GA	G	CASC17	0.075	4.539e-08	EnR-Prn		0.4355	0.0858284	0.023937	0.0003414		0.4256	0.0724044	0.0443923	0.1033		0.4145	0.0484215	0.0225216	0.03162		0.4459	0.106805	0.0302431	0.0004214
	rs10712335	17	69164251	GA	G	CASC17	0.0774	1.592e-08	Prn-EnL		0.4355	0.095066	0.024055	7.922e-05		0.4256	0.0493943	0.04469	0.2696		0.4145	0.0519771	0.0223269	0.01998		0.4459	0.108813	0.0301922	0.0003199
	rs4793533	17	69164471	T	C	CASC17	0.0801	2.65e-08	Prn-EnL		0.4432	0.0944984	0.0240897	8.948e-05		NA	NA	NA	NA		0.4145	0.0519771	0.0223269	0.01998		0.4459	0.108813	0.0301922	0.0003199
	rs68181052	17	69165750	T	C	CASC17	0.0817	1.407e-08	Prn-EnL		0.4462	0.0992596	0.0241591	4.073e-05		NA	NA	NA	NA		0.4145	0.0519771	0.0223269	0.01998		0.446	0.108877	0.0302115	0.000321
	rs2367263	17	69166288	G	A	CASC17	0.0772	1.929e-08	Prn-EnL		0.4288	0.0981876	0.0241118	4.78e-05		0.42	0.0466011	0.0444695	0.2951		0.408	0.0498633	0.022461	0.02647		0.4407	0.108073	0.0303209	0.0003731
	rs1859964	17	69166571	T	G	CASC17	0.0754	4.188e-08	EnR-Prn		0.4284	0.0878098	0.0240187	0.0002599		0.4194	0.075754	0.0442083	0.08707		0.4076	0.0470337	0.022645	0.03785		0.4405	0.106546	0.0303371	0.000453
	rs1859964	17	69166571	T	G	CASC17	0.078	1.369e-08	Prn-EnL		0.4284	0.0987551	0.0241338	4.383e-05		0.4194	0.04899	0.0444328	0.2706		0.4076	0.0505805	0.0224603	0.02435		0.4405	0.108813	0.030308	0.0003377
	rs1859965	17	69167095	C	T	CASC17	0.0779	1.474e-08	Prn-EnL		0.4287	0.0992281	0.0241212	3.984e-05		0.4196	0.0514524	0.0444328	0.2474		0.408	0.0498633	0.022461	0.02647		0.4409	0.107397	0.0303338	0.0004081
	rs6501446	17	69168058	T	G	CASC17	0.0766	2.671e-08	EnR-Prn		0.4281	0.0868663	0.0240156	0.000303		0.4195	0.0763062	0.0441346	0.08402		0.4076	0.0469962	0.0226488	0.03805		0.4357	0.113869	0.0304991	0.0001935
	rs6501446	17	69168058	T	G	CASC17	0.0784	1.216e-08	Prn-EnL		0.4281	0.0977777	0.0241307	5.206e-05		0.4195	0.0496148	0.0443225	0.2634		0.4076	0.0505805	0.0224603	0.02437		0.4357	0.112256	0.0304947	0.0002377
	rs4239156	17	69168381	T	C	CASC17	0.076	3.555e-08	EnR-Prn		0.4281	0.0868663	0.0240156	0.000303		0.4194	0.0792878	0.0441346	0.07288		0.4076	0.0470337	0.022645	0.03785		0.4368	0.109398	0.0305866	0.0003556
	rs4239156	17	69168381	T	C	CASC17	0.0781	1.369e-08	Prn-EnL		0.4281	0.0977777	0.0241307	5.206e-05		0.4194	0.0531429	0.044396	0.2318		0.4076	0.0505805	0.0224603	0.02435		0.4368	0.109521	0.0305558	0.0003462
	rs4438347	17	69168406	T	C	CASC17	0.0757	3.924e-08	EnR-Prn		0.4281	0.0868663	0.0240156	0.000303		0.4195	0.0770424	0.0441714	0.08156		0.4076	0.0469962	0.0226488	0.03805		0.4368	0.109398	0.0305866	0.0003556
	rs4438347	17	69168406	T	C	CASC17	0.0779	1.534e-08	Prn-EnL		0.4281	0.0977777	0.0241307	5.206e-05		0.4195	0.0503498	0.044396	0.2572		0.4076	0.0505805	0.0224603	0.02437		0.4368	0.109521	0.0305558	0.0003462
	rs4793335	17	69168691	A	G	CASC17	-0.0743	4.978e-08	EnR-Prn		0.4804	-0.0850107	0.0238992	0.000381		0.4746	-0.0622817	0.044061	0.1578		0.4908	-0.0448208	0.0221556	0.04313		0.4518	-0.117888	0.0303468	0.0001054
	rs9891611	17	69169250	A	G	CASC17	0.0771	2.046e-08	Prn-EnL		0.4281	0.0977777	0.0241307	5.206e-05		0.4208	0.0462336	0.0444695	0.2985		0.4076	0.0505805	0.0224603	0.02437		0.4398	0.106979	0.0303048	0.0004241
	rs9913988	17	69180058	T	C	CASC17	0.0752	4.659e-08	EnR-Prn		0.4282	0.0858599	0.0240156	0.0003545		0.4203	0.0760117	0.0439874	0.08429		0.4078	0.0464711	0.0226357	0.04012		0.4425	0.109527	0.0304343	0.0003272
	rs9913988	17	69180058	T	C	CASC17	0.0785	1.131e-08	Prn-EnL		0.4282	0.0962957	0.0241338	6.761e-05		0.4203	0.0517096	0.0442123	0.2425		0.4078	0.0505805	0.0224403	0.02425		0.4425	0.113961	0.0304013	0.0001827
	rs758106	17	69181003	T	C	CASC17	0.0782	1.23e-08	Prn-EnL		0.4282	0.0962957	0.0241338	6.761e-05		0.4201	0.0516361	0.0441755	0.2426		0.4074	0.0500898	0.0224216	0.02554		0.4425	0.113929	0.0304078	0.0001836
	rs740408	17	69181096	C	A	CASC17	-0.0745	4.305e-08	EnR-Prn		0.4807	-0.0826834	0.023915	0.0005528		0.4738	-0.0606989	0.0436929	0.165		0.4921	-0.0437331	0.0221322	0.0482		0.4492	-0.125697	0.0302852	3.443e-05
	rs2886915	17	69182161	A	T	CASC17	0.0783	1.185e-08	Prn-EnL		0.4282	0.0962957	0.0241338	6.761e-05		0.4202	0.0524079	0.0441755	0.2358		0.4074	0.0500898	0.0224216	0.02554		0.4425	0.113961	0.0304013	0.0001827
	rs2003060	17	69182293	A	G	CASC17	0.0783	1.185e-08	Prn-EnL		0.4282	0.0962957	0.0241338	6.761e-05		0.4201	0.0524079	0.0441755	0.2358		0.4074	0.0500898	0.0224216	0.02554		0.4425	0.113961	0.0304013	0.0001827
	rs9891648	17	69184952	A	G	CASC17	0.0751	4.751e-08	EnR-Prn		0.4283	0.0858599	0.0240156	0.0003545		0.4201	0.07557	0.0438402	0.08522		0.4073	0.0459085	0.022615	0.04241		0.4427	0.110402	0.0304408	0.0002938
	rs9891648	17	69184952	A	G	CASC17	0.0784	1.133e-08	Prn-EnL		0.4283	0.0962957	0.0241338	6.761e-05		0.4201	0.0513421	0.0441388	0.2452		0.4073	0.0503918	0.0224163	0.02465		0.4427	0.114476	0.0304174	0.0001722
	rs9898150	17	69185195	G	T	CASC17	-0.0745	4.353e-08	EnR-Prn		0.4819	-0.0843188	0.0239275	0.0004315		0.4755	-0.0584904	0.0436193	0.1803		0.4927	-0.0439207	0.0221486	0.04748		0.4521	-0.123882	0.0303144	4.539e-05
	rs6501451	17	69193131	T	C	CASC17	0.0761	2.905e-08	Prn-EnL		0.4301	0.0928588	0.0240676	0.0001164		0.4213	0.0513421	0.0440653	0.2442		0.4082	0.0480137	0.0223632	0.03186		0.4443	0.112963	0.0304528	0.0002124
	rs17178377	17	69198133	A	G	CASC17	-0.0747	3.733e-08	EnR-Prn		0.4804	-0.0859857	0.0239055	0.0003264		0.4737	-0.0544781	0.0436193	0.2123		0.4916	-0.0447458	0.0220749	0.04272		0.447	-0.122845	0.0302528	5.068e-05
	rs11655744	17	69199056	T	C	CASC17	0.0783	1.218e-08	Prn-EnL		0.4312	0.0953813	0.0241023	7.763e-05		0.423	0.0507173	0.0443225	0.2525		0.4082	0.0506183	0.0223777	0.02376		0.4466	0.115441	0.0305622	0.000163
	rs2367266	17	69199987	G	C	CASC17	0.078	1.296e-08	Prn-EnL		0.4305	0.0942147	0.0241023	9.447e-05		0.4218	0.0534737	0.0442123	0.2269		0.4085	0.0490706	0.0223455	0.02813		0.4479	0.117822	0.0305107	0.000116
	rs11658666	17	69202014	T	A	CASC17	-0.0749	3.75e-08	EnR-Prn		0.4806	-0.0869292	0.0239212	0.0002834		0.4719	-0.0519015	0.0439874	0.238		0.491	-0.0436581	0.0221278	0.0486		0.4479	-0.125308	0.0303339	3.744e-05
	rs9916542	17	69239121	A	T	CASC17	0.0948	4.716e-08	Prn-EnL		0.4371	0.0923228	0.0239478	0.0001181		0.4318	0.0516729	0.0447268	0.2485		NA	NA	NA	NA		0.4533	0.119044	0.03053	9.955e-05
	rs35473710	17	69761369	G	A	SOX9	0.1927	3.952e-08	AlR-ChL		0.0872	0.168768	0.0439586	0.0001252		NA	NA	NA	NA		NA	NA	NA	NA		0.07418	0.234548	0.0581899	5.766e-05
	rs6047838	20	22033920	G	A	PAX1	0.2001	1.277e-08	AlL-AlR		0.06737	0.20336	0.0491988	3.665e-05		0.06214	0.198347	0.092048	0.03146		NA	NA	NA	NA		0.06899	0.196063	0.0600865	0.001116
	rs16983329	20	22035197	A	G	PAX1	0.2573	1.598e-09	AlL-AlR		0.02805	0.252453	0.0764453	0.000971		0.02641	0.233148	0.131491	0.07656		0.02617	0.272968	0.0714201	0.0001345		0.0297	0.250445	0.0894114	0.00514
	rs16983337	20	22036535	C	T	PAX1	0.2588	5.602e-09	AlL-AlR		0.02858	0.239677	0.0744688	0.001303		NA	NA	NA	NA		0.02675	0.281557	0.070548	6.716e-05		0.0299	0.24998	0.0891579	0.005087
	rs6036025	20	22039868	A	G	PAX1	0.1401	8.07e-09	AlL-AlR		0.08934	0.169408	0.0429166	8.078e-05		0.08269	0.06621	0.0817128	0.418		0.08866	0.12211	0.0394796	0.001997		0.09041	0.15854	0.0526496	0.002634
	rs927833	20	22041577	T	C	PAX1	0.1383	1.158e-08	AlL-AlR		0.08934	0.169408	0.0429166	8.078e-05		0.08236	0.06621	0.0817128	0.418		0.08857	0.12211	0.0395307	0.002021		0.09162	0.150089	0.0521003	0.004015
	rs17739870	20	22067014	A	G	PAX1	0.2771	1.828e-08	AlL-AlR		0.02531	0.266217	0.0809628	0.001019		0.02408	0.10202	0.142796	0.4751		0.019	0.321397	0.0838064	0.0001278		0.01623	0.334363	0.120765	0.005669
	rs1028444	20	22267058	C	T	PAX1	-0.093	7.811e-11	AlL-AlR		0.3873	-0.0916214	0.0254994	0.0003313		0.3944	-0.0786849	0.0460644	0.08792		0.3827	-0.0770473	0.0234686	0.001036		0.4079	-0.128159	0.030563	2.865e-05
	rs1028445	20	22267094	A	G	PAX1	-0.0933	6.682e-11	AlL-AlR		0.3866	-0.093739	0.0255135	0.0002422		0.3924	-0.0756166	0.0462259	0.1021		0.3827	-0.0770473	0.0234686	0.001036		0.4077	-0.128117	0.0305545	2.855e-05
	rs6047999	20	22268484	C	T	PAX1	-0.0931	7.466e-11	AlL-AlR		0.3871	-0.0914449	0.0255029	0.0003421		0.3944	-0.0786849	0.0460644	0.08792		0.383	-0.0765294	0.0234681	0.001122		0.4081	-0.12968	0.0305503	2.284e-05
	rs1832371	20	22271089	A	G	PAX1	-0.0928	8.234e-11	AlL-AlR		0.387	-0.0914449	0.0255029	0.0003421		0.3944	-0.0786849	0.0460644	0.08792		0.3829	-0.0755798	0.0234429	0.001275		0.4076	-0.130314	0.0305672	2.098e-05
	rs139354005	20	22271180	C	CT	PAX1	-0.0929	7.944e-11	AlL-AlR		0.387	-0.0927155	0.0254923	0.0002798		0.3959	-0.0744862	0.0461855	0.1072		0.3829	-0.0755798	0.0234429	0.001275		0.4062	-0.130864	0.0305968	1.973e-05
	rs140924439	20	22272805	C	CT	PAX1	-0.0927	9.439e-11	AlL-AlR		0.3825	-0.0848098	0.0255312	0.0009037		0.3898	-0.0872034	0.046347	0.06015		0.3805	-0.0783854	0.023525	0.0008711		0.4062	-0.130864	0.0305968	1.973e-05
	rs62202817	20	22273720	T	G	PAX1	-0.0935	5.586e-11	AlL-AlR		0.3869	-0.0928213	0.0255029	0.0002775		0.3964	-0.0775949	0.0453781	0.08768		0.3831	-0.0768747	0.0234303	0.001042		0.4066	-0.130272	0.0306264	2.195e-05
	rs980970	20	22274930	T	C	PAX1	-0.0937	5.172e-11	AlL-AlR		0.3868	-0.0928213	0.0255029	0.0002775		0.3966	-0.0775949	0.0453781	0.08768		0.3831	-0.0768747	0.0234303	0.001042		0.4062	-0.130864	0.0305968	1.973e-05
	rs4813451	20	22276299	T	C	PAX1	-0.0937	5.067e-11	AlL-AlR		0.3869	-0.0928213	0.0255029	0.0002775		0.3966	-0.0775949	0.0453781	0.08768		0.3831	-0.0768747	0.0234303	0.001042		0.4063	-0.131159	0.0306137	1.917e-05
	rs4813452	20	22276813	G	T	PAX1	-0.0931	6.717e-11	AlL-AlR		0.3869	-0.0928213	0.0255029	0.0002775		0.3966	-0.0775949	0.0453781	0.08768		0.3831	-0.0768747	0.0234303	0.001042		0.4075	-0.12837	0.0306095	2.858e-05
	rs1035986	20	22277099	C	T	PAX1	-0.0931	6.717e-11	AlL-AlR		0.3869	-0.0928213	0.0255029	0.0002775		0.3967	-0.0775949	0.0453781	0.08768		0.3831	-0.0768747	0.0234303	0.001042		0.4075	-0.12837	0.0306095	2.858e-05
	rs1035987	20	22277868	G	A	PAX1	-0.0941	4.281e-11	AlL-AlR		0.3869	-0.0928213	0.0255029	0.0002775		0.3967	-0.0775949	0.0453781	0.08768		0.3831	-0.0768747	0.0234303	0.001042		0.4072	-0.13323	0.0306898	1.478e-05
	rs6113620	20	22280350	G	C	PAX1	-0.0938	4.938e-11	AlL-AlR		0.3869	-0.0928213	0.0255029	0.0002775		0.3969	-0.0773526	0.0453781	0.08837		0.383	-0.0770905	0.0234318	0.00101		0.4063	-0.131159	0.0306137	1.917e-05
	rs6113622	20	22280603	C	T	PAX1	-0.0932	6.613e-11	AlL-AlR		0.387	-0.0928213	0.0255029	0.0002775		0.3969	-0.0773526	0.0453781	0.08837		0.383	-0.0770905	0.0234318	0.00101		0.407	-0.128497	0.0306517	2.874e-05
	rs17192817	20	22281873	C	T	PAX1	-0.0932	6.598e-11	AlL-AlR		0.3869	-0.0928213	0.0255029	0.0002775		0.3969	-0.0773526	0.0453781	0.08837		0.383	-0.0770905	0.0234318	0.00101		0.4078	-0.128497	0.0306475	2.868e-05
	rs17192831	20	22281954	T	C	PAX1	-0.0938	4.938e-11	AlL-AlR		0.3869	-0.0928213	0.0255029	0.0002775		0.3969	-0.0773526	0.0453781	0.08837		0.383	-0.0770905	0.0234318	0.00101		0.4063	-0.131159	0.0306137	1.917e-05
	rs62202820	20	22283238	T	C	PAX1	-0.0946	3.41e-11	AlL-AlR		0.3865	-0.0931743	0.0254818	0.0002602		0.3969	-0.0759396	0.0455395	0.09564		0.3823	-0.0794213	0.0234489	0.0007152		0.4065	-0.131075	0.0306306	1.963e-05
	rs2180687	20	22283850	A	C	PAX1	-0.0943	3.968e-11	AlL-AlR		0.3866	-0.0935272	0.0254747	0.0002455		0.3969	-0.0759396	0.0455395	0.09564		0.3824	-0.078817	0.0234505	0.0007843		0.4078	-0.129934	0.030601	2.267e-05
	rs4813453	20	22284559	A	T	PAX1	-0.0947	3.362e-11	AlL-AlR		0.3867	-0.0944801	0.0254782	0.0002118		0.397	-0.0759396	0.0455395	0.09564		0.3823	-0.0798098	0.0234735	0.0006812		0.4076	-0.128624	0.0306052	2.745e-05
	rs4813454	20	22284723	T	C	PAX1	-0.0954	2.316e-11	AlL-AlR		0.3867	-0.0944801	0.0254782	0.0002118		0.397	-0.0759396	0.0455395	0.09564		0.3824	-0.0802846	0.0234682	0.00063		0.4065	-0.131413	0.0306095	1.837e-05
	rs6113624	20	22286430	A	G	PAX1	-0.0952	2.652e-11	AlL-AlR		0.3867	-0.0948331	0.0254641	0.0001993		0.3965	-0.0759396	0.0456203	0.09627		0.3826	-0.0798098	0.0234873	0.0006848		0.4064	-0.130694	0.0306517	2.097e-05
	rs62202846	20	22288388	T	A	PAX1	-0.0936	5.52e-11	AlL-AlR		0.3864	-0.0952213	0.0254959	0.0001916		0.3958	-0.07707	0.0456203	0.09154		0.3825	-0.0776516	0.0234668	0.0009463		0.4067	-0.126089	0.0306221	3.984e-05
	rs8124887	20	22290780	A	G	PAX1	-0.0921	1.181e-10	AlL-AlR		0.3864	-0.0952213	0.0254959	0.0001916		0.3955	-0.0743651	0.0457818	0.1048		0.3816	-0.0761409	0.0234858	0.001197		0.406	-0.122962	0.0307067	6.418e-05
	rs4815103	20	22291219	A	C	PAX1	-0.0921	1.196e-10	AlL-AlR		0.3864	-0.0952213	0.0254959	0.0001916		0.3955	-0.0741633	0.0459029	0.1063		0.3815	-0.0761409	0.0234785	0.001193		0.406	-0.122962	0.0307067	6.418e-05

## Sheet: TS8
	Table S8. Replication of reported variants of facial variation
	Authors	Reference	Cohort	Trait	Mapping Trait	Image	Cytoband	Loci/genes	SNP	CHR	BP (hg37)	MinP	Com. P	% (78)
	Liu et al.	23028347	Europeans	AlrL-Prn	Prn-AlL	3D	1p36.23-p33	PRDM16	rs4648379	1	3261516	6.39e-06	0.00502653	0.1538
				EyeR-Nsn	EnR-N	3D	2q35	PAX3	rs974448	2	223005314	1.97e-11	1.798e-13	0.3718
				EyeR-EyeL	AlR-ChR	3D	3q28	TP63	rs17447439	3	189549423	0.00656	0.824165	0.0256
				ZygR-Nsn	EnR-N	3D	5q35.1	C5orf50	rs6555969	5	171128464	0.005006	0.207296	0.1154
				EyeL-Nsn	EnL-ChL	3D	10q24.3	COL17A1	rs805722	10	105810400	0.04361	0.88616	0.0128
								_
	Paternoster et al.	22341974	ALSPAC (UK)	n-men	EnR-N	3D	2q36.1	PAX3	rs7559271	2	223068286	7.8e-14	3.67601e-15	0.3974
				prn-alL	Prn-AlL	3D	3p14.3	CACNA2D3	rs1982862	3	55064740	0.0002904	0.037406	0.1282
				prn-alL	Prn-AlR	3D	5q12.1	C5orf64	rs11738462	5	61013776	0.01244	0.133831	0.1282
				enR.yz	AlL-ChL	3D	12q21.31	TMTC2	rs10862567	12	83422352	0.001966	0.0956716	0.0897
								_
	Cole et al.	27560698	Africans	PC1	-	3D	1p36.12	HNRNPR	rs139879053	1	23639799	-	-	-
				Centroid Size	EnR-Prn	3D	3q25.33	SCHIP1	rs79909949	3	159492478	0.01009	0.693277	0.0513
				STO_SL	EnR-AlL	3D	8q24.23	intergenic	rs7836044	8	137893150	0.01223	0.379921	0.0897
				Allometry	ExR-Prn	3D	15q25.3	PDE8A	rs12908400	15	85573176	0.00871	0.201379	0.0513
				Allometry	ExR-Prn	3D	15q25.3	PDE8A	rs12909111	15	85604326	0.006476	0.222392	0.0513
								_
	Shaffer et al.	27560520	US Cohorts	Intercanthal width	AlL-Ls	3D	1p13.3	GSTM2	rs619686	1	110218761	0.0531	0.942515	0
				Upper facial depth	ExL-AlR	3D	11q22.1	TRPC6	rs12786942	11	101394765	0.04473	0.656275	0.0128
				Nasal ala length	EnR-Sn	3D	14q11.2	RNASE	rs8007643	14	21365801	0.002531	0.0407986	0.1154
				Cranial base width	AlL-ChL	3D	14q21.1	FOXA1	rs17106852	14	38038468	0.02956	0.490331	0.0385
				Nasal width	AlL-AlR	3D	20p11.22	PAX1	rs2424399	20	21632545	6.35e-07	0.00134539	0.1923
				Cranial base width	N-AlR	3D	20q12	MAFB	rs6129564	20	38904203	2.52e-05	0.00112423	0.1795
				Intercanthal width	-	3D	Xq13.2	HDAC8	rs11093404	X	72289467	-	-	-
								_
	Kaustubh et al.	27193062	Latin Americans	Chin protrusion	-	3D+2D	2q12	EDAR	rs3827760	2	109513601	-	-	-
				Nasion position	EnR-N	3D+2D	2q35	PAX3	rs7559271	2	223068286	7.8e-14	3.67601e-15	0.3974
				Columella inclination	EnR-AlL	3D+2D	4q31	SFRP2	rs2045323	4	154831899	0.0009363	0.00295225	0.2051
				Columella inclination	-	3D+2D	4q31	DCHS2	rs12644248	4	155235392	-	-	-
				Nose bridge breadth	Ls-ChR	3D+2D	6p21	SUPT3H/RUNX2	rs1852985	6	45329656	6.23e-06	0.00107218	0.1923
				Nose wing breadth	AlL-AlR	3D+2D	7p13	GLI3	rs17640804	7	42131390	7.85e-06	1.22769e-05	0.2564
				Nose wing breadth	AlL-AlR	3D+2D	20p11	PAX1	rs927833	20	22041577	1.16e-08	7.0966e-07	0.2308
								_
	Seongwon Cha et al.	29921221	Koreans	Face shape (Angle)	Prn-ChL	2D	2p24.1	OSR1-WDR35	rs7567283	2	19732291	0.009058	0.476945	0.0513
				upper eyelid	N-EnL	2D	2q31.1	HOXD1-MTX2	rs970797	2	177111819	1.36e-07	1.70652e-05	0.2564
				eye distance	AlR-ChL	2D	6q27	WDR27	rs3736712	6	169957964	0.1213	0.969517	0
				nose profile size	EnL-AlR	2D	17q24.3	SOX9	rs2193054	17	70025809	0.01684	0.883579	0.0128
				nose width	Prn-Sn	2D	20q12	DHX35	rs2206437	20	37992741	0.007779	0.191434	0.1026
								_
	Pickrell et al.	27182965	23andMe	nose_size	-	Self-reported	1p32.3	GLIS1	rs702489	1	54197688	-	-	-
				nose_size	N-Prn	Self-reported	1q41	LYPLAL1	rs5781117	1	219642187	0.000656	0.0294403	0.1282
				nose_size	EnR-N	Self-reported	2q36.1	PAX3	rs34460569	2	223026935	4.26e-17	4.40584e-21	0.4615
				nose_size	ExL-Li	Self-reported	3p14.3	CACNA2D3	rs56063440	3	54731374	0.002795	0.0596454	0.1538
				nose_size	N-Sn	Self-reported	3p13	FOXP1	3:71227306:T_TGA	3	71227306	0.004712	0.272167	0.0513
				nose_size	ExL-ChL	Self-reported	3p12.3	ROBO1	rs424737	3	78815906	0.008531	0.378278	0.0513
				nose_size	ExR-EnL	Self-reported	3q25.31	LEKR1	rs11717138	3	156534628	0.004763	0.0595251	0.1282
				nose_size	Prn-Ls	Self-reported	3q27.1	EPHB3	rs13097965	3	184339757	1.74e-05	0.060848	0.0897
				nose_size	EnL-Sn	Self-reported	4q24	EMCN	rs6851148	4	101218062	0.0003451	0.0193478	0.141
				nose_size	ExR-AlL	Self-reported	6p21.1	SUPT3H	6:44820741:AG_A	6	44820741	3.95e-05	2.34176e-06	0.3077
				nose_size	-	Self-reported	6p12.2	GSTA4	rs142900698	6	52834739	-	-	-
				nose_size	Prn-EnL	Self-reported	8p23.1	PPP1R3B	rs2929451	8	9085295	0.0002228	1.12942e-06	0.2949
				nose_size	Prn-AlR	Self-reported	8p23.1	MSRA	rs11782517	8	10113507	0.01127	0.049053	0.1282
				nose_size	ExL-AlL	Self-reported	8p22	DLC1	rs767764	8	13199810	0.0009257	0.0274684	0.1538
				nose_size	EnL-ChR	Self-reported	9p24.3	DMRT2	rs10809266	9	1106093	0.03074	0.636732	0.0385
				nose_size	EnL-Sn	Self-reported	9q22.31	ROR2	rs10761129	9	94486321	0.00026	0.00235154	0.2051
				nose_size	Prn-ChL	Self-reported	12q21.31	RASSF9	rs10779169	12	85967804	0.01395	0.164999	0.0641
				nose_size	EnR-Prn	Self-reported	13q34	IRS2	rs146188897	13	110372691	1.45e-06	2.20716e-08	0.3846
				nose_size	N-Prn	Self-reported	14q24.1	RAD51B	rs34702092	14	68991747	0.003249	0.0354788	0.141
				nose_size	ExL-Ls	Self-reported	14q32.13	GSC	rs2224309	14	95333678	0.001079	0.264622	0.0769
				nose_size	-	Self-reported	16q24.1	FOXL1	rs61646804	16	86608898	-	-	-
				nose_size	EnL-ChL	Self-reported	17q24.3	SOX9	rs34091987	17	70025587	0.04654	0.686711	0.0128
				nose_size	N-Sn	Self-reported	20q12	DHX35	rs6101567	20	38105055	0.008015	0.227314	0.0513
				nose_size	ExL-ChR	Self-reported	20q13.31	BMP7	rs35130793	20	55792165	0.002103	0.0251812	0.141
				nose_size	-	Self-reported	Xq21.1	ITM2A	rs5959351	X	78675583	-	-	-
				chin_dimple	N-EnL	Self-reported	1p12	TBX15	rs1766786	1	119452500	0.02304	0.875189	0.0385
				chin_dimple	N-ChL	Self-reported	1q22	ADAM15	rs11589479	1	155033308	0.01254	0.0948879	0.0769
				chin_dimple	ExR-EnR	Self-reported	1q23.1	ARHGEF11	rs1336149	1	156939175	0.001525	0.0141958	0.1282
				chin_dimple	EnR-EnL	Self-reported	1q31.3	CRB1	rs2476023	1	197351039	0.00289	0.615934	0.0256
				chin_dimple	-	Self-reported	2p21	PKDCC	rs6740960	2	42181679	-	-	-
				chin_dimple	EnR-N	Self-reported	2q12.1	LOC107985928	rs10175706	2	104631814	0.002163	0.0728916	0.1154
				chin_dimple	EnL-ChL	Self-reported	2q22.3	GTDC1	rs11688237	2	144560021	0.0005752	0.0427138	0.1282
				chin_dimple	EnR-EnL	Self-reported	2q22.3	TEX41	rs17479393	2	145653287	4.419e-06	5.5023e-14	0.5128
				chin_dimple	EnR-EnL	Self-reported	2q31.1	HOXD cluster	rs59156997	2	177371846	0.01302	0.619438	0.0128
				chin_dimple	AlR-Li	Self-reported	2q33.1	SATB2	rs13035389	2	199666111	0.05802	0.865287	0
				chin_dimple	AlL-Sn	Self-reported	2q36.1	FARSB	rs4674676	2	223529112	0.000666	0.0812807	0.1154
				chin_dimple	EnL-Sn	Self-reported	3q24	-	rs12495832	3	147829477	0.027	0.932682	0.0128
				chin_dimple	ChR-ChL	Self-reported	3q25.32	RSRC1	rs11713363	3	157828322	0.005632	0.254111	0.1154
				chin_dimple	ExL-Li	Self-reported	3q26.32	LINC00578	rs2133593	3	177301992	0.09267	0.801646	0
				chin_dimple	N-Li	Self-reported	4q28.1	FAT4	rs145365164	4	126954652	0.07763	0.866532	0
				chin_dimple	Prn-EnL	Self-reported	4q34.1	SCRG1	rs12505328	4	174378004	0.03391	0.833599	0.0256
				chin_dimple	Prn-Ls	Self-reported	4q34.1	FBXO8	rs17275866	4	175071486	0.06943	0.849351	0
				chin_dimple	ExR-Prn	Self-reported	4q34.3	VEGFC	rs12509218	4	177587237	0.01639	0.0697049	0.1026
				chin_dimple	-	Self-reported	5q13.3	ARHGEF28	rs199880074	5	73483120	-	-	-
				chin_dimple	-	Self-reported	5q14.2	MIR3977	rs10078545	5	82124190	-	-	-
				chin_dimple	N-AlR	Self-reported	5q33.2	HAND1	rs4958741	5	153868262	0.007178	0.271625	0.0641
				chin_dimple	Sn-Li	Self-reported	5q35.2	MSX2	rs4868444	5	174160113	0.1151	0.960268	0
				chin_dimple	Prn-ChR	Self-reported	6p21.1	SUPT3H	rs17336368	6	44751668	0.0008335	0.00383026	0.2179
				chin_dimple	N-Li	Self-reported	6q16.1	intergenic	rs112215522	6	94913574	0.004719	0.0232441	0.1282
				chin_dimple	EnR-ChL	Self-reported	7q21.3	C7orf76	rs11768577	7	96143804	0.003133	0.104831	0.0897
				chin_dimple	AlL-Sn	Self-reported	8p12	NRG1	rs2347498	8	32353180	0.009523	0.630327	0.0513
				chin_dimple	EnR-AlR	Self-reported	8q13.3	EYA1	rs10504499	8	72036904	0.001254	0.221122	0.0385
				chin_dimple	EnR-AlR	Self-reported	8q24.13	-	rs12541121	8	123101743	0.01112	0.580713	0.0256
				chin_dimple	AlL-ChL	Self-reported	9p24.2	GLIS3	rs4237150	9	4290085	0.0504	0.87274	0
				chin_dimple	Sn-AlR	Self-reported	9p22.2	BNC2	rs10962767	9	16958463	0.01043	0.191625	0.0513
				chin_dimple	ExL-AlL	Self-reported	9q33.3	MVB12B	rs62578082	9	129277041	0.07594	0.982078	0
				chin_dimple	ChR-Li	Self-reported	10q21.1	DKK1	rs1194708	10	54199812	0.0802	0.929966	0
				chin_dimple	AlL-AlR	Self-reported	10q22.3	C10orf11	rs11001765	10	78150285	0.008235	0.196588	0.0769
				chin_dimple	Prn-AlR	Self-reported	12q14.3	HMGA2	rs141753469	12	66397166	0.01517	0.619805	0.0256
				chin_dimple	ExL-Li	Self-reported	13q12.11	LOC105370108	rs73168105	13	22713708	0.01284	0.490679	0.0385
				chin_dimple	N-Li	Self-reported	14q22.2	BMP4	rs72678242	14	54255510	0.04344	0.739175	0.0128
				chin_dimple	ExR-Prn	Self-reported	14q32.13	DICER1	rs7161418	14	95479889	0.01769	0.487628	0.0641
				chin_dimple	Prn-Sn	Self-reported	15q13.3	GREM1	rs6494598	15	32995468	0.04348	0.578775	0.0385
				chin_dimple	EnR-Prn	Self-reported	15q26.3	ASB7	rs7167736	15	101206638	0.007017	0.392123	0.0513
				chin_dimple	Prn-Sn	Self-reported	17p13.1	TNFSF12	rs80067372	17	7452752	0.0006122	0.286916	0.0513
				chin_dimple	Prn-Sn	Self-reported	17q24.1	CEP112	rs11650175	17	63743650	0.01794	0.526272	0.0385
				chin_dimple	Prn-EnL	Self-reported	17q24.3	CASC17	rs56347314	17	69123106	8.143e-08	7.24824e-10	0.359
				chin_dimple	ExL-AlL	Self-reported	18q21.2	CCDC68	rs7243821	18	52655532	0.004173	0.445711	0.0897
				chin_dimple	AlR-Ls	Self-reported	19q12	ZNF536	rs55700449	19	30982165	0.005719	0.379079	0.0385
				chin_dimple	EnL-AlL	Self-reported	20p12.1	TASP1	rs2073323	20	13514434	0.03102	0.490815	0.0256
				chin_dimple	N-EnL	Self-reported	20q12	DHX35	rs6028446	20	38101545	1.034e-06	2.71747e-06	0.2436
								_
	Lee et al.	28441456	US Cohorts	Factor 9	N-AlR	3D	6q26	PARK2	rs9456748	6	162590018	0.00104	0.155152	0.0897
				Factor 21	-	3D	8q12	intergenic	rs113036800	8	58449027	-	-	-
				Factor 17	ExR-Ls	3D	9p22	FREM1	rs72713618	9	14883254	0.03957	0.878057	0.0128
				Factor 3	-	3D	12q24.2	intergenic	rs117438382	12	119414564	-	-	-
				Factor 7	-	3D	16p12.1	intergenic	rs62031988	16	27017495	-	-	-
				Factor 22	-	3D	Xp11.3	intergenic	rs138440928	X	44350343	-	-	-
				Factor 14	-	3D	Xq13	HDAC8	rs11093404	X	72289467	-	-	-
								_
	Claes et al.	29459680	US Cohorts	Q2-M41	ExR-Li	3D	1p32.1	intergenic	rs4916068	1	60997570	0.02632	0.639544	0.0256
				Q4-M7	EnR-AlR	3D	1p12	TBX15	rs72691108	1	119762175	0.003766	0.289438	0.0385
				Q3-M13	AlR-Li	3D	1q31.3	ASPM	rs2821116	1	197329041	0.0001127	0.0148534	0.1795
				Q3-M26	-	3D	2p21	PKDCC	rs6740960	2	42181679	-	-	-
				Q2,3-M38	N-EnL	3D	2q31.1	HOXD cluster	rs970797	2	177111819	1.356e-07	1.70652e-05	0.2564
				Q2-M10	EnR-N	3D	2q36.1	PAX3	rs10176525	2	223039052	3.384e-17	2.00903e-20	0.4744
				Q2,3-M16	EnR-AlL	3D	3q21.3	RAB7A,ACAD9	rs2977562	3	128106267	0.001318	0.0278368	0.1538
				Q2-M20	EnL-Sn	3D	3q27.1	EPHB3,DVL3	rs58022575	3	184333169	0.05231	0.402195	0
				Q2-M45	EnL-AlL	3D	4q31.3	DCHS2	rs9995821	4	154828366	8.055e-12	5.09127e-17	0.3718
				Q2-M10	ChR-Li	3D	6p21.1	SUPT3H	rs227833	6	44681840	0.002988	0.0497999	0.1667
				Q4-M30	ExR-ChR	3D	6q23.2	RPS12,EYA4	rs5880172	6	133615646	0.006423	0.429136	0.0256
				Q3-M55	EnR-ChL	3D	7q21.3	DLX6,DYNC1L1	rs10238953	7	96124975	0.002655	0.0843408	0.0769
				Q2-M2	Prn-EnL	3D	17q24.3	BC039327	rs11655006	17	69139583	7.488e-10	1.45266e-13	0.4359
				Q2-M10	ExR-Prn	3D	17q24.3	SOX9	rs5821892	17	70036479	0.00385	0.0169514	0.1026
				Q2-M41	EnR-Sn	3D	19q13.11	KCTD15	rs287104	19	34290995	0.0003555	0.000348128	0.2308

## Sheet: TS9
	Table S9. GWAS Catalog entries (release on 2018-01-01), for polymorphisms that were significantly associated with facial traits in meta-analyses
	REGION	CHR	POS	SNPS	PUBMEDID	DISEASE/TRAIT	MAPPED_GENE	CONTEXT	P-VALUE	_	MinP	% (78)	Mapping Trait
	1p36.22	1	10736809	rs880315	28739976	Systolic blood pressure	CASZ1	intron_variant	9e-16		0.007093	0.0128	N-ExL
	1p36.22	1	10736809	rs880315	28739976	Pulse pressure	CASZ1	intron_variant	2e-10		0.007093	0.0128	N-ExL
	1p36.22	1	10736809	rs880315	21572416	Blood pressure	CASZ1	intron_variant	3e-10		0.007093	0.0128	N-ExL
	1p36.22	1	10736809	rs880315	28739976	Diastolic blood pressure	CASZ1	intron_variant	4e-10		0.007093	0.0128	N-ExL
	1p36.22	1	10736809	rs880315	25249183	Hypertension	CASZ1	intron_variant	2e-09		0.007093	0.0128	N-ExL
	1p36.13	1	16178825	rs1497406	22001757	Liver enzyme levels	LOC101927479 - ARHGEF19	regulatory_region_variant	3e-19		0.008298	0.0641	N-Sn
	1p31.3	1	68382998	rs1925953	28073927	Vertical cup-disc ratio	TCEB1P18 - RPE65	upstream_gene_variant	3e-08		1.251e-05	0.1923	EnL-Sn
	1p12	1	118227648	rs2359714	27182965	Breast size	LOC105378930 - RNA5SP56	intergenic_variant	4e-09		0.01961	0.0256	EnR-EnL
	1p12	1	118319448	rs200154334	28166213	Lung function (FVC)	RNA5SP56 - PSMC1P12	intergenic_variant	8e-14		-	-	-
	1p12	1	118339066	rs12083887	27182965	Male-pattern baldness	RNA5SP56 - PSMC1P12	regulatory_region_variant	9e-14		0.002172	0.0641	Sn-ChR
	1p12	1	118360355	rs2474937	23708190	Congenital heart malformation	RNA5SP56 - PSMC1P12	intergenic_variant	8e-10		0.0004312	0.1282	EnR-Li
	1p12	1	118909877	rs1766786	27182965	Chin dimples	TBX15	intron_variant	2e-13		0.02304	0.0385	N-EnL
	1p12	1	118954531	rs12143789	25673412	Waist-to-hip ratio	TBX15	intron_variant	4e-09		0.0009683	0.1282	N-AlR
	1p12	1	118961220	rs984222	20935629	Waist-hip ratio	TBX15	intron_variant	9e-25		0.007856	0.0128	EnR-AlL
	1p12	1	118961220	rs984222	28448500	Waist circumference	TBX15	intron_variant	2e-24
	1p12	1	118962811	rs10923712	28443625	Waist circumference	TBX15	intron_variant	2e-25		0.008987	0.0128	EnR-AlL
	1p12	1	118988874	rs1106529	25673412	Waist-to-hip ratio	TBX15	intron_variant	2e-19		0.029	0.0513	EnR-EnL
	1p12	1	119004219	rs10923724	28448500	Waist circumference	LOC107985191 - WARS2	upstream_gene_variant	9e-25		0.002519	0.0641	EnR-AlL
	1p12	1	119004219	rs10923724	28448500	Waist-to-hip ratio	LOC107985191 - WARS2	upstream_gene_variant	6e-22		0.002519	0.0641	EnR-AlL
	1p12	1	119004219	rs10923724	28892062	Body mass index	LOC107985191 - WARS2	upstream_gene_variant	2e-08		0.002519	0.0641	EnR-AlL
	1p12	1	119006795	rs2765539	25673412	Waist-to-hip ratio	LOC107985191 - WARS2	intergenic_variant	1e-12		0.01883	0.0641	N-AlR
	1p12	1	119031964	rs2645294	28443625	Waist-to-hip ratio	WARS2	3_prime_UTR_variant	1e-21		0.003457	0.0641	EnR-AlL
	1p12	1	119088551	rs17023223	28448500	Waist-to-hip ratio	WARS2	intron_variant	4e-08		0.0001817	0.2179	EnR-AlR
	1p12	1	119333107	rs17023457	26105758	Ear morphology	LOC105378934	intron_variant	5e-12		0.009743	0.0641	ChR-Li
	1p12	1	119333107	rs17023457	26105758	Folding of antihelix	LOC105378934	intron_variant	1e-11		0.009743	0.0641	ChR-Li
	1p12	1	119333107	rs17023457	26105758	Antitragus size	LOC105378934	intron_variant	2e-08		0.009743	0.0641	ChR-Li
	2p12	2	77715718	rs11126630	26087016	Childhood and early adolescence aggressive behavior	TRP-AGG5-1 - LOC101927967	intergenic_variant	5e-08		0.006335	0.0513	Prn-AlL
	2q36.1	2	221895559	rs13398147	26394188	Adolescent idiopathic scoliosis	LOC105373899 - LOC105373900	regulatory_region_variant	8e-13		0.0141	0.0641	N-ChR
	2q36.1	2	222169363	* rs2218065	26926045	Monobrow thickness	RPL23AP28 - PAX3	regulatory_region_variant	5e-08		2.493e-11	0.4231	EnR-N
	2q36.1	2	222203567	* rs7559271	22341974	Facial morphology	PAX3	intron_variant	4e-16		7.795e-14	0.3974	EnR-N
	2q36.1	2	222203567	* rs7559271	27193062	middle facial morphology traits (quantitative measurement)	PAX3	intron_variant	4e-11		7.795e-14	0.3974	EnR-N
	2q36.1	2	222229770	rs2053316	27182965	Monobrow	LOC105373901, PAX3	intron_variant	8e-104		9.249e-06	0.141	EnR-N
	4q28.1	4	127647811	rs181743661	27863252	Mean corpuscular hemoglobin	INTU	intron_variant	3e-09		-	-	-
	4q28.1	4	127647811	rs181743661	27863252	Mean corpuscular volume	INTU	intron_variant	5e-09		-	-	-
	6p21.2	6	39760057	rs417096	25108383	Hypospadias	KIF6 - DAAM2	intergenic_variant	7e-25		0.002863	0.1154	EnR-AlR
	8p23.2	8	3848285	rs13260600	27723756	Gut microbiota (beta diversity)	CSMD1	intron_variant	5e-08		0.0006989	0.1026	AlR-Li
	8p23.2	8	3909688	rs2688325	25231870	Menarche (age at onset)	CSMD1	intron_variant	2e-09		0.0339	0.0256	EnR-Prn
	8p23.2	8	4014005	rs56367447	27989323	Macrophage colony stimulating factor levels	CSMD1	intron_variant	2e-08		-	-	-
	8p23.2	8	4244902	rs145669495	28270201	Resting heart rate	CSMD1	intron_variant	2e-08		-	-	-
	8p23.2	8	4323322	rs10503253	25056061	Schizophrenia	CSMD1	intron_variant	1e-08		0.01651	0.0385	ChR-ChL
	8p23.2	8	4323322	rs10503253	23453885	Autism spectrum disorder, attention deficit-hyperactivity disorder, bipolar disorder, major depressive disorder, and schizophrenia (combined)	CSMD1	intron_variant	4e-08		0.01651	0.0385	ChR-ChL
	8p23.2	8	4325535	rs13261217	28991256	Schizophrenia	CSMD1	intron_variant	2e-09		0.009526	0.0513	EnL-AlR
	8p23.2	8	4380617	rs6558872	24166486	Schizophrenia, schizoaffective disorder or bipolar disorder	CSMD1	intron_variant	5e-08		0.02533	0.0128	ExR-EnL
	8p23.2	8	4702559	rs7828501	25231870	Menarche (age at onset)	CSMD1	intron_variant	1e-13		0.03695	0.0256	N-AlR
	8p23.2	8	4976268	rs7463166	25231870	Menarche (age at onset)	CSMD1	intron_variant	1e-08		0.07061	0	N-Ls
	8p23.2	8	6092608	rs752045	27325353	Hand grip strength	LOC105377797 - LOC100287015	intron_variant	5e-10		0.02677	0.0513	ExL-Ls
	9q22.31	9	91724039	rs10761129	27182965	Nose size	ROR2	missense_variant	7e-09		0.00026	0.2051	EnL-Sn
	10q22.1	10	69180045	rs10998624	22610502	Immune reponse to smallpox	VPS26A - SUPV3L1	upstream_gene_variant	1e-09		-	-	-
	10q22.1	10	69215316	rs59073566	27863252	Lymphocyte counts	SUPV3L1 - LOC101928994	upstream_gene_variant	3e-10		-	-	-
	10q22.1	10	69223185	rs4746822	23903356	Glycemic traits (pregnancy)	HKDC1, LOC101928994	non_coding_transcript_exon_variant	1e-22		0.001153	0.1795	AlL-ChL
	12q24.21	12	114430333	rs1265507	22532574	Percent mammographic density	LOC105369998	regulatory_region_variant	1e-08		0.02396	0.0128	AlL-ChL
	12q24.21	12	114656455	rs11067228	28139693	Prostate-specific antigen levels	OSTF1P1 - TBX3	downstream_gene_variant	1e-14		0.01713	0.0513	EnR-EnL
	12q24.21	12	114908619	rs1896312	20062060	PR interval	LOC107984437 - LOC102723639	intergenic_variant	3e-17		0.002263	0.0641	Prn-AlR
	12q24.21	12	114914926	rs2384550	19430479	Diastolic blood pressure	LOC107984437 - LOC102723639	regulatory_region_variant	4e-08		0.0001824	0.2308	ExR-Sn
	12q24.21	12	114925946	rs3914956	27577874	QRS duration	LOC107984437 - LOC102723639	downstream_gene_variant	3e-10		0.003839	0.0897	AlL-Sn
	12q24.21	12	114925946	rs3914956	27577874	QRS duration	LOC107984437 - LOC102723639	downstream_gene_variant	1e-09		0.003839	0.0897	AlL-Sn
	12q24.21	12	114943266	rs7132327	27659466	QRS complex (12-leadsum)	LOC107984437 - LOC102723639	intergenic_variant	1e-17		0.002323	0.0769	AlL-Sn
	12q24.21	12	114943935	rs10850409	24850809	PR segment	LOC107984437 - LOC102723639	intergenic_variant	8e-13		0.002863	0.0897	AlL-Sn
	12q24.21	12	115062886	rs35506	28166213	Lung function (FVC)	LOC102723639	intergenic_variant	1e-09		0.07421	0	AlL-Li
	12q24.21	12	115114632	rs35444	21572416	Blood pressure	LOC102723639 - LOC105370003	intergenic_variant	1e-10		0.001115	0.1538	ExR-EnR
	12q24.21	12	115398717	rs1292011	29059683	Breast cancer	LOC105370003	regulatory_region_variant	4e-39		0.03307	0.0385	ExL-ChL
	12q24.21	12	115490635	rs10850519	28135244	Diastolic blood pressure	LOC105370003	intergenic_variant	5e-13		0.004249	0.1154	ExL-ChL
	16q12.2	16	53605526	rs3213758	23678272	Vitiligo (non-segmental)	RPGRIP1L	missense_variant	6e-11		0.0005923	0.1667	Ls-ChR
	17q24.3	17	71110733	rs17765344	25939597	Prostate cancer	CASC17	intron_variant	4e-21		2.269e-07	0.2564	Prn-EnL
	17q24.3	17	71111532	rs8071558	26034056	Prostate cancer	CASC17	intron_variant	7e-11		1.668e-07	0.2692	Prn-EnL
	17q24.3	17	71112612	rs1859962	19767753	Prostate cancer	CASC17	intron_variant	2e-16		1.542e-07	0.2821	Prn-EnL
	17q24.3	17	71122495	rs4793529	24753544	Prostate cancer	CASC17	intron_variant	2e-13		2.393e-05	0.1795	Prn-EnL
	17q24.3	17	71126965	rs56347314	27182965	Chin dimples	CASC17	intron_variant	5e-12		8.143e-08	0.359	Prn-EnL
	17q24.3	17	71129465	* rs11654749	23284291	Pulmonary function (smoking interaction)	CASC17	intron_variant	1e-08		1.73e-08	0.4231	Prn-EnL
	17q24.3	17	71240857	rs12946942	24023777	Adolescent idiopathic scoliosis (severe)	CASC17 - RNU7-155P	intergenic_variant	6e-12		0.02818	0.0641	N-EnL
	20p11.22	20	21754716	rs202233001	28762467	Sulfasalazine-induced agranulocytosis	SLC25A6P1 - RPL41P1	upstream_gene_variant	4e-08		-	-	-
	20p11.22	20	21841272	rs6047663	28334814	Adolescent idiopathic scoliosis	RPL41P1 - LINC01432	regulatory_region_variant	2e-15		0.003162	0.1154	N-Sn
	20p11.22	20	21872462	rs2180439	18849994	Male-pattern baldness	RPL41P1 - LINC01432	intergenic_variant	3e-15		0.003284	0.0897	N-Sn
	20p11.22	20	21888075	rs6082544	27182965	Monobrow	RPL41P1 - LINC01432	regulatory_region_variant	4e-09		0.0005397	0.1026	N-Sn
	20p11.22	20	21904055	rs6137473	25784220	Adolescent idiopathic scoliosis	RPL41P1 - LINC01432	intergenic_variant	3e-08		0.008391	0.0385	N-Sn
	20p11.22	20	22019643	rs201563	27182965	Male-pattern baldness	RPL41P1 - LINC01432	intergenic_variant	3e-81		0.01026	0.0513	EnR-EnL
	20p11.22	20	22056937	rs6047844	22693459	Male-pattern baldness	LINC01432	intron_variant	2e-39		0.01221	0.1538	N-Sn
	20p11.22	20	22060939	* rs927833	27193062	facial morphology traits (multivariate analysis)	LINC01432	intron_variant	2e-08		1.158e-08	0.2308	AlL-AlR
	20p11.22	20	22069865	rs1160312	18849991	Male-pattern baldness	LINC01432	intron_variant	1e-14		0.001835	0.0897	EnR-EnL

## Sheet: TS10
	Table S10. Significant pleiotropic effect of study-wide suggestive SNPs on GeneATLAS traits
	Candidate Gene	Region	CHR	SNPS	P-VALUE	Trait in GeneATLAS
	CMSS1	3q12.1	3	rs113663609	4.8373e-17	Standing height
					9.5359e-11	Comparative height size at age 10
	RNF144B	6p22.3	6	rs2225718	6.8079e-09	Impedance of arm (left)
					9.5532e-09	Impedance of whole body
					1.708e-08	Mean corpuscular volume
					3.6611e-08	Impedance of arm (right)
	ROR2	9q22.31	9	rs2230578	1.4649e-27	Standing height
					4.3838e-27	Sitting height
					6.0337e-26	Impedance of arm (right)
					1.7834e-24	Impedance of arm (left)
					4.765e-21	Impedance of whole body
					1.6865e-09	Impedance of leg (left)
					6.6315e-09	Impedance of leg (right)
	TBX3	12q24.21	12	rs1863716	1.5349e-08	hypertension
	CASC17	17q24.3	17	rs8077906	2.0693e-09	Malignant neoplasm of prostate
					1.9559e-08	Malignant neoplasms of male genital organs

[truncated: 9 more sheets: TS11, TS12, TS13, TS14, TS15, TS16, TS17, TS18, TS19]
